# Supplementary material
Source: Research Square preprint supplement (doi:10.21203/rs.3.rs-9149727/v1)
Supplement: Supplementary file 1 [file 063ac3b74676a15a2fb28d90.xlsx]

## Sheet: Export Summary
	This document was exported from Numbers. Each table was converted to an Excel worksheet. All other objects on each Numbers sheet were placed on separate worksheets. Please be aware that formula calculations may differ in Excel.
	Numbers Sheet Name	Numbers Table Name	Excel Worksheet Name
	Mapped
		SraRunTable_WGS	Mapped - SraRunTable_WGS
	Mapped - SraRunTable_WGS
		Table 1	Mapped - SraRunTable_WGS
	Not mapped yet
		Tabelle 1	Not mapped yet - Tabelle 1
	Lost samples
		Tabelle 1	Lost samples - Tabelle 1

## Sheet: Mapped - SraRunTable_WGS
SraRunTable_WGS
Sample name	Run name when available	Morphospecies	Collecting country	Collecting continent	Collecting location	Exact location	Collection date	COI_haplotype	Bases	Gbases	Read length	No reads	Subsample proportion	Number of subsampled reads	Number of subsampled bases	BioProject	Sequencing platform	Publication	Mt genome mean coverage	Nuclear genome average coverage
H24F01		Eriocheir sinensis	Germany	Europe	Germany:Havel		2023		78491252	0.784913	150	78491252	1	78491252	78491252		Illumina Novaseq 6000	This study	357.984	3.16283
H24F02		Eriocheir sinensis	Germany	Europe	Germany:Havel		2023		81417824	0.814178	150	81417824	1	81417824	81417824		Illumina Novaseq 6000	This study	343.5	3.24679
H24F03		Eriocheir sinensis	Germany	Europe	Germany:Havel		2023		77424536	0.774245	150	77424536	1	77424536	77424536		Illumina Novaseq 6000	This study	293.082	3.13242
H24F06		Eriocheir sinensis	Germany	Europe	Germany:Havel		2023		81857442	0.818574	150	81857442	1	81857442	81857442		Illumina Novaseq 6000	This study	812.339	3.33537
H24F09		Eriocheir sinensis	Germany	Europe	Germany:Havel		2023		79559250	0.795593	150	79559250	1	79559250	79559250		Illumina Novaseq 6000	This study	447.984	3.25813
H24F10		Eriocheir sinensis	Germany	Europe	Germany:Havel		2023		75916460	0.759165	150	75916460	1	75916460	75916460		Illumina Novaseq 6000	This study	398.87	3.07713
H24F13		Eriocheir sinensis	Germany	Europe	Germany:Havel		2023		76517420	0.765174	150	76517420	1	76517420	76517420		Illumina Novaseq 6000	This study	347.885	3.1988
H24F14		Eriocheir sinensis	Germany	Europe	Germany:Havel		2023		100092664	1.00093	150	100092664	1	100092664	100092664		Illumina Novaseq 6000	This study	504.016	4.01996
H24F16		Eriocheir sinensis	Germany	Europe	Germany:Havel		2023		71704306	0.717043	150	71704306	1	71704306	71704306		Illumina Novaseq 6000	This study	404.287	3.0527
H24F18		Eriocheir sinensis	Germany	Europe	Germany:Havel		2023		81152732	0.811527	150	81152732	1	81152732	81152732		Illumina Novaseq 6000	This study	354.683	3.2826
BE001	230500002941-A01	Eriocheir sinensis	Belgium	Europe	Belgium:Scheldt	Grobbendonk	2018-04-12	H18	17579738700	175.797	150	117198258	1	117198258	17579738700		Illumina Novaseq 6000	This study	484.893	4.14219
BE043	230500002941-B01	Eriocheir sinensis	Belgium	Europe	Belgium:Scheldt	Grobbendonk	2020-04-21	H3	18414542400	184.145	150	122763616	1	122763616	18414542400		Illumina Novaseq 6000	This study	147.933	4.35987
BE139	230500002941-E01	Eriocheir sinensis	Belgium	Europe	Belgium:Scheldt	Doel	2020-09-02	H1	16673494200	166.735	150	111156628	1	111156628	16673494200		Illumina Novaseq 6000	This study	46.9642	3.80622
BE145	230500002941-F01	Eriocheir sinensis	Belgium	Europe	Belgium:Scheldt	Doel	2020-09-02	EJ_H1	6816275400	68.1628	150	45441836	1	45441836	6816275400		Illumina Novaseq 6000	This study	30.8529	1.76238
BE148	230500002941-H01	Eriocheir sinensis	Belgium	Europe	Belgium:Scheldt	Grobbendonk	2020-10-22	EJ_H1	6620718000	66.2072	150	44138120	1	44138120	6620718000		Illumina Novaseq 6000	This study	289.165	1.03524
BE156	230500002941-H02	Eriocheir sinensis	Belgium	Europe	Belgium:Scheldt	Grobbendonk	2020-10-22	EJ_H1	14859125400	148.591	150	99060836	1	99060836	14859125400		Illumina Novaseq 6000	This study	21.2423	2.74563
BE153	230800000543-A02	Eriocheir sinensis	Belgium	Europe	Belgium:Scheldt	Grobbendonk	2020-10-22	EJ_H1	7328760600	73.2876	150	48858404	1	48858404	7328760600		Illumina Novaseq 6000	This study	120.655	1.07392
BE126	230800000543-C01	Eriocheir sinensis	Belgium	Europe	Belgium:Scheldt	Steendorp	2020-09-15	H3	13718107800	137.181	150	91454052	1	91454052	13718107800		Illumina Novaseq 6000	This study	129.936	2.66866
EJ22	230800000543-H02	Eriocheir japonica	Japan	Asia	Japan:Sinjiko	Sinjiko Lake, Shimane prefecture, Matue city	2022-01-01	EJ_H1	9624600600	96.246	150	64164004	1	64164004	9624600600		Illumina Novaseq 6000	This study	44.5526	1.56449
Crab3	SRR24682900	Eriocheir sinensis	China	Asia	China:Yangcheng	Yangcheng Lake, Suzhou City, Jiangsu Provence			264058371900	2640.58	150	1760389146	0.025	44008128	6547676090	PRJNA934422	Illumina HiSeq X	Cui et al. 2021	328.013	1.95
Crab1	SRR24682906	Eriocheir sinensis	China	Asia	China:Yangcheng	Yangcheng Lake, Suzhou City, Jiangsu Provence			289440677400	2894.41	150	1929604516	0.025	48243374	7219528902	PRJNA934422	Illumina HiSeq X	Cui et al. 2021	127.809	1.293
H01		Eriocheir hepuensis	China	Asia	China:Hepu				39697794000	396.978	150	264651960	0.2	52927570	7939135500		Illumina Novaseq 6000	Wang et al 2025	266.777	2.04278
H02		Eriocheir hepuensis	China	Asia	China:Hepu				35200218000	352.002	150	234668120	0.2	46924254	7038638100		Illumina Novaseq 6000	Wang et al 2025	255.185	1.71849
H03		Eriocheir hepuensis	China	Asia	China:Hepu				42189857400	421.899	150	281265716	0.2	56238118	8435717700		Illumina Novaseq 6000	Wang et al 2025	134.326	1.96953
H05		Eriocheir hepuensis	China	Asia	China:Hepu				17999933700	179.999	150	119999558	0.2	23993466	3599019900		Illumina Novaseq 6000	Wang et al 2025	68.9774	1.70352
H06		Eriocheir hepuensis	China	Asia	China:Hepu				40043498400	400.435	150	266956656	0.2	53377388	8006608200		Illumina Novaseq 6000	Wang et al 2025	124.356	2.02194
H07		Eriocheir hepuensis	China	Asia	China:Hepu				34436220000	344.362	150	229574800	0.2	45914960	6887244000		Illumina Novaseq 6000	Wang et al 2025	161.701	1.58477
HX02		Eriocheir hepuensis	China	Asia	China:Hepu				42113088000	421.131	150	280753920	0.2	56151248	8422687200		Illumina Novaseq 6000	Wang et al 2025	569.399	2.26665
E1600		Eriocheir sinensis	China	Asia	China:LiaoRiver				41620806000	416.208	150	277472040	0.2	55494408	8324161200		Illumina Novaseq 6000	Wang et al 2025	888.259	2.50883
E1602		Eriocheir sinensis	China	Asia	China:LiaoRiver				36652081500	366.521	150	244347210	0.2	48869442	7330416300		Illumina Novaseq 6000	Wang et al 2025	292.159	2.21723
E1606		Eriocheir sinensis	China	Asia	China:LiaoRiver				40054285500	400.543	150	267028570	0.2	53405714	8010857100		Illumina Novaseq 6000	Wang et al 2025	322.294	2.32022
E1607		Eriocheir sinensis	China	Asia	China:LiaoRiver				39656877000	396.569	150	264379180	0.2	52875836	7931375400		Illumina Novaseq 6000	Wang et al 2025	382.838	2.4297
E1613		Eriocheir sinensis	China	Asia	China:LiaoRiver				38388682500	383.887	150	255924550	0.2	51184910	7677736500		Illumina Novaseq 6000	Wang et al 2025	388.513	2.33303
E1617		Eriocheir sinensis	China	Asia	China:LiaoRiver				34633564500	346.336	150	230890430	0.2	46178086	6926712900		Illumina Novaseq 6000	Wang et al 2025	298.206	2.13753
E1619		Eriocheir sinensis	China	Asia	China:LiaoRiver				43244769000	432.448	150	288298460	0.2	57659692	8648953800		Illumina Novaseq 6000	Wang et al 2025	423.704	2.55148
E1621		Eriocheir sinensis	China	Asia	China:LiaoRiver				39329943000	393.299	150	262199620	0.2	52439924	7865988600		Illumina Novaseq 6000	Wang et al 2025	505.175	2.35154
E1626		Eriocheir sinensis	China	Asia	China:LiaoRiver				38500344000	385.003	150	256668960	0.2	51333792	7700068800		Illumina Novaseq 6000	Wang et al 2025	326.637	2.31578
E1627		Eriocheir sinensis	China	Asia	China:LiaoRiver				42028939500	420.289	150	280192930	0.2	56038586	8405787900		Illumina Novaseq 6000	Wang et al 2025	391.809	2.58352
M14-03		Eriocheir hepuensis x sinensis	China	Asia	China:Min				41053077300	410.531	150	273687182	0.2	54747110	8212066500		Illumina Novaseq 6000	Wang et al 2025	239.95	2.21284
M14-04		Eriocheir hepuensis x sinensis	China	Asia	China:Min				43923771000	439.238	150	292825140	0.2	58579724	8784900000		Illumina Novaseq 6000	Wang et al 2025	206.582	2.37187
M14-05		Eriocheir hepuensis x sinensis	China	Asia	China:Min				46254694800	462.547	150	308364632	0.2	61670222	9250428000		Illumina Novaseq 6000	Wang et al 2025	451.32	2.34488
M14-06		Eriocheir hepuensis x sinensis	China	Asia	China:Min				41189316300	411.893	150	274595442	0.2	54922324	8237892600		Illumina Novaseq 6000	Wang et al 2025	404.148	2.20716
M15-01		Eriocheir hepuensis x sinensis	China	Asia	China:Min				38745686400	387.457	150	258304576	0.2	51660456	7749068400		Illumina Novaseq 6000	Wang et al 2025	195.38	1.9551
M15-02		Eriocheir hepuensis x sinensis	China	Asia	China:Min				36011019300	360.11	150	240073462	0.2	48029878	7204481700		Illumina Novaseq 6000	Wang et al 2025	12.818	1.78578
M15-04		Eriocheir hepuensis x sinensis	China	Asia	China:Min				40284196500	402.842	150	268561310	0.2	53712262	8056839300		Illumina Novaseq 6000	Wang et al 2025	57.5973	1.33133
M15-05		Eriocheir hepuensis x sinensis	China	Asia	China:Min				27049732500	270.497	150	180331550	0.2	36066310	5409946500		Illumina Novaseq 6000	Wang et al 2025	222.91	1.38013
M15-07		Eriocheir hepuensis x sinensis	China	Asia	China:Min				33949033500	339.49	150	226326890	0.2	45265378	6789806700		Illumina Novaseq 6000	Wang et al 2025	135.107	1.72914
M15-08		Eriocheir hepuensis x sinensis	China	Asia	China:Min				42544497000	425.445	150	283629980	0.2	56725996	8508899400		Illumina Novaseq 6000	Wang et al 2025	56.5984	1.55845
E1513		Eriocheir sinensis	China	Asia	China:Yangtze				39560677500	395.607	150	263737850	0.2	52747570	7912135500		Illumina Novaseq 6000	Wang et al 2025	321.361	2.44641
E1514		Eriocheir sinensis	China	Asia	China:Yangtze				39243067500	392.431	150	261620450	0.2	52324090	7848613500		Illumina Novaseq 6000	Wang et al 2025	411.52	2.38322
E1519		Eriocheir sinensis	China	Asia	China:Yangtze				38926293000	389.263	150	259508620	0.2	51901724	7785258600		Illumina Novaseq 6000	Wang et al 2025	417.962	2.32652
E1520		Eriocheir sinensis	China	Asia	China:Yangtze				36617652000	366.177	150	244117680	0.2	48823536	7323530400		Illumina Novaseq 6000	Wang et al 2025	301.171	2.21899
E1523		Eriocheir sinensis	China	Asia	China:Yangtze				37078722000	370.787	150	247191480	0.2	49438296	7415744400		Illumina Novaseq 6000	Wang et al 2025	153.533	2.17227
E1527		Eriocheir sinensis	China	Asia	China:Yangtze				37818015000	378.18	150	252120100	0.2	50424020	7563603000		Illumina Novaseq 6000	Wang et al 2025	296.784	2.37257
E1529		Eriocheir sinensis	China	Asia	China:Yangtze				35686759500	356.868	150	237911730	0.2	47582346	7137351900		Illumina Novaseq 6000	Wang et al 2025	572.058	2.24283
E1532		Eriocheir sinensis	China	Asia	China:Yangtze				37416865500	374.169	150	249445770	0.2	49889154	7483373100		Illumina Novaseq 6000	Wang et al 2025	378.381	2.35031
E1505		Eriocheir sinensis	China	Asia	China:Yangtze				40538418000	405.384	150	270256120	0.2	54051224	8107683600		Illumina Novaseq 6000	Wang et al 2025	311.954	2.46809
E1401		Eriocheir sinensis	China	Asia	China:YellowRiver				41695216500	416.952	150	277968110	0.2	55593622	8339043300		Illumina Novaseq 6000	Wang et al 2025	316.467	2.46704
E1403		Eriocheir sinensis	China	Asia	China:YellowRiver				39184972500	391.85	150	261233150	0.2	52246630	7836994500		Illumina Novaseq 6000	Wang et al 2025	223.816	2.37832
E1406		Eriocheir sinensis	China	Asia	China:YellowRiver				45228712500	452.287	150	301524750	0.2	60304950	9045742500		Illumina Novaseq 6000	Wang et al 2025	689.398	2.8009
E1411		Eriocheir sinensis	China	Asia	China:YellowRiver				34933794000	349.338	150	232891960	0.2	46578392	6986758800		Illumina Novaseq 6000	Wang et al 2025	328.1	2.10899
E1412		Eriocheir sinensis	China	Asia	China:YellowRiver				34558114500	345.581	150	230387430	0.2	46077486	6911622900		Illumina Novaseq 6000	Wang et al 2025	266.124	2.10171
E1414		Eriocheir sinensis	China	Asia	China:YellowRiver				36421305000	364.213	150	242808700	0.2	48561740	7284261000		Illumina Novaseq 6000	Wang et al 2025	322.468	2.18822
E1415		Eriocheir sinensis	China	Asia	China:YellowRiver				35816430000	358.164	150	238776200	0.2	47755240	7163286000		Illumina Novaseq 6000	Wang et al 2025	354.748	2.18149
E1416		Eriocheir sinensis	China	Asia	China:YellowRiver				32281965000	322.82	150	215213100	0.2	43042620	6456393000		Illumina Novaseq 6000	Wang et al 2025	211.408	1.99583
E1418		Eriocheir sinensis	China	Asia	China:YellowRiver				37636432500	376.364	150	250909550	0.2	50181910	7527286500		Illumina Novaseq 6000	Wang et al 2025	270.461	2.33533
E1419		Eriocheir sinensis	China	Asia	China:YellowRiver				18811686000	188.117	150	125411240	0.2	25082248	3762337200		Illumina Novaseq 6000	Wang et al 2025	187.697	1.12589
JA254		Eriocheir japonica	Japan	Asia	Japan:Hokkaido				38626850400	386.269	150	257512336	0.2	51496324	7725370080		Illumina Novaseq 6000	Wang et al 2025	92.3617	1.5
JA470		Eriocheir japonica	Japan	Asia	Japan:Hokkaido				34112316600	341.123	150	227415444	0.2	45486970	6822463320		Illumina Novaseq 6000	Wang et al 2025	27.857	0.927
JB449		Eriocheir japonica	Japan	Asia	Japan:Hokkaido				42268560000	422.686	150	281790400	0.4	112716160	16907424000		Illumina Novaseq 6000	Wang et al 2025	50.0026	3.26806
JB450		Eriocheir japonica	Japan	Asia	Japan:Hokkaido				38953124250	389.531	150	259687495	0.4	103874998	15581249700		Illumina Novaseq 6000	Wang et al 2025	179.691	3.43846
JB451		Eriocheir japonica	Japan	Asia	Japan:Hokkaido				38882017500	388.82	150	259213450	0.2	51842690	7776403500		Illumina Novaseq 6000	Wang et al 2025	92.3814	1.92622
JB452		Eriocheir japonica	Japan	Asia	Japan:Hokkaido				43093966500	430.94	150	287293110	0.2	57458622	8618793300		Illumina Novaseq 6000	Wang et al 2025	96.1368	2.09391
JB454		Eriocheir japonica	Japan	Asia	Japan:Hokkaido				42578500500	425.785	150	283856670	0.2	56771334	8515700100		Illumina Novaseq 6000	Wang et al 2025	124.936	2.15073
JB482		Eriocheir japonica	Japan	Asia	Japan:Hokkaido				43803433800	438.034	150	292022892	0.2	58398974	8759846100		Illumina Novaseq 6000	Wang et al 2025	188.989	2.429
JJ582		Eriocheir japonica	Japan	Asia	Japan:Hokkaido				25325962500	253.26	150	168839750	0.2	33768354	5065253100		Illumina Novaseq 6000	Wang et al 2025	196.28	1.446
JJ584		Eriocheir japonica	Japan	Asia	Japan:Hokkaido				33105692100	331.057	150	220704614	0.2	44134786	6620217900		Illumina Novaseq 6000	Wang et al 2025	188.828	1.884
R01		Eriocheir japonica x sinensis	Russia	Asia	Russia:Vladivostok				42158208900	421.582	150	281054726	0.2	56213368	8432005200		Illumina Novaseq 6000	Wang et al 2025	216.72	2.25
R02		Eriocheir japonica x sinensis	Russia	Asia	Russia:Vladivostok				42089296200	420.893	150	280595308	0.2	56121838	8418275700		Illumina Novaseq 6000	Wang et al 2025	346.999	2.223
R03		Eriocheir japonica x sinensis	Russia	Asia	Russia:Vladivostok				43661188500	436.612	150	291074590	0.2	58219544	8732931600		Illumina Novaseq 6000	Wang et al 2025	234.097	2.125
R05		Eriocheir japonica x sinensis	Russia	Asia	Russia:Vladivostok				40518011100	405.18	150	270120074	0.2	54018442	8102766300		Illumina Novaseq 6000	Wang et al 2025	221.281	2.157
R08		Eriocheir japonica x sinensis	Russia	Asia	Russia:Vladivostok				42445991700	424.46	150	282973278	0.2	84894150	12734122500		Illumina Novaseq 6000	Wang et al 2025	78.0511	2.232
R09		Eriocheir japonica x sinensis	Russia	Asia	Russia:Vladivostok				42445991700	424.46	150	282973278	0.3	84894150	12734122500		Illumina Novaseq 6000	Wang et al 2025	112.759	2.27601
R11		Eriocheir japonica x sinensis	Russia	Asia	Russia:Vladivostok				40763465700	407.635	150	271756438	0.3	81525730	12228859500		Illumina Novaseq 6000	Wang et al 2025	236.391	2.2862
R12		Eriocheir japonica x sinensis	Russia	Asia	Russia:Vladivostok				43394076600	433.941	150	289293844	0.3	86775604	13016340600		Illumina Novaseq 6000	Wang et al 2025	121.896	2.3529
R18		Eriocheir japonica x sinensis	Russia	Asia	Russia:Vladivostok				41432837400	414.328	150	2.76198e+08	0.3	82859348	12428902200		Illumina Novaseq 6000	Wang et al 2025	355.373	2.80257
R25		Eriocheir japonica x sinensis	Russia	Asia	Russia:Vladivostok				40830494100	408.305	150	418750210	0.2	83750042	12562506300		Illumina Novaseq 6000	Wang et al 2025	501.597	2.28351
