# Supplementary material
Source: Research Square preprint supplement (doi:10.21203/rs.3.rs-9149727/v1)
Supplement: Supplementary file 2 [file 2156781bb5dce0fd985e9e53.xlsx]

## Sheet: Tabelle1
Name	Accession	Reference	Comment
Eriocheir sinensis_BE145_Belgium:Ostflandern,Doel,Scheldt	-	This study
Eriocheir sinensis_BE139_Belgium:Ostflandern,Doel,Scheldt	-	This study
Eriocheir sinensis_BE148_Belgium:Antwerpen,Grobbendonk,Nete	-	This study
Eriocheir sinensis_RE12423_Belgium:Antwerpen,Antwerpen,Scheldt	-	This study
Eriocheir sinensis_BE153_Belgium:Antwerpen,Grobbendonk,Nete	-	This study
Eriocheir sinensis_BE156_Belgium:Antwerpen,Grobbendonk,Nete	-	This study
Eriocheir sinensis_BE001_Belgium:Antwerpen,Grobbendonk,Nete	-	This study
Eriocheir sinensis_BE043_Belgium:Antwerpen,Grobbendonk,Nete	-	This study
Eriocheir sinensis_BE150_Belgium:Antwerpen,Grobbendonk,Nete	-	This study
Eriocheir sinensis_BE126_Belgium:Ostflandern,Steendorp,Scheldt	-	This study
Eriocheir sinensis_RE12423_Belgium:Antwerpen,Antwerpen,Scheldt	-	This study
Eriocheir sinensis_H24F01_Germany:Brandenburg,Havel	-	This study
Eriocheir sinensis_H24F02_Germany:Brandenburg,Havel	-	This study
Eriocheir sinensis_H24F03_Germany:Brandenburg,Havel	-	This study
Eriocheir sinensis_H24F06_Germany:Brandenburg,Havel	-	This study
Eriocheir sinensis_H24F09_Germany:Brandenburg,Havel	-	This study
Eriocheir sinensis_H24F10_Germany:Brandenburg,Havel	-	This study
Eriocheir sinensis_H24F13_Germany:Brandenburg,Havel	-	This study
Eriocheir sinensis_H24F14_Germany:Brandenburg,Havel	-	This study
Eriocheir sinensis_H24F16_Germany:Brandenburg,Havel	-	This study
Eriocheir sinensis_H24F18_Germany:Brandenburg:Havel	-	This study
Eriocheir japonica_JA254_Japan:Hokkaido	-	Wang et al. 2025
Eriocheir japonica_JA470_Japan:Hokkaido	-	Wang et al. 2025
Eriocheir japonica_JB449_Japan:Hokkaido	-	Wang et al. 2025
Eriocheir japonica_JB450_Japan:Hokkaido	-	Wang et al. 2025
Eriocheir japonica_JB451_Japan:Hokkaido	-	Wang et al. 2025
Eriocheir japonica_JB452_Japan:Hokkaido	-	Wang et al. 2025
Eriocheir japonica_JB454_Japan:Hokkaido	-	Wang et al. 2025
Eriocheir japonica_JB482_Japan:Hokkaido	-	Wang et al. 2025
Eriocheir japonica_JJ582_Japan:Hokkaido	-	Wang et al. 2025
Eriocheir japonica_JJ584_Japan:Hokkaido	-	Wang et al. 2025
Eriocheir japonicaXsinensis_R01_Russia:Primorje,Vladivostock	-	Wang et al. 2025
Eriocheir japonicaXsinensis_R02_Russia:Primorje,Vladivostock	-	Wang et al. 2025
Eriocheir japonicaXsinensis_R03_Russia:Primorje,Vladivostock	-	Wang et al. 2025
Eriocheir japonicaXsinensis_R05_Russia:Primorje,Vladivostock	-	Wang et al. 2025
Eriocheir japonicaXsinensis_R08_Russia:Primorje,Vladivostock	-	Wang et al. 2025
Eriocheir japonicaXsinensis_R09_Russia:Primorje,Vladivostock	-	Wang et al. 2025
Eriocheir japonicaXsinensis_R11_Russia:Primorje,Vladivostock	-	Wang et al. 2025
Eriocheir japonicaXsinensis_R12_Russia:Primorje,Vladivostock	-	Wang et al. 2025
Eriocheir japonicaXsinensis_R13_Russia:Primorje,Vladivostock	-	Wang et al. 2025
Eriocheir japonicaXsinensis_R14_Russia:Primorje,Vladivostock	-	Wang et al. 2025
Eriocheir sinensis_E1401_China:Shandong,YellowRiver	-	Wang et al. 2025
Eriocheir sinensis_E1403_China:Shandong,YellowRiver	-	Wang et al. 2025
Eriocheir sinensis_E1406_China:Shandong,YellowRiver	-	Wang et al. 2025
Eriocheir sinensis_E1411_China:Shandong,YellowRiver	-	Wang et al. 2025
Eriocheir sinensis_E1412_China:Shandong,YellowRiver	-	Wang et al. 2025
Eriocheir sinensis_E1505_China:Shanghai,Shanghai,YangtzeRiver	-	Wang et al. 2025
Eriocheir sinensis_E1513_China:Shanghai,Shanghai,YangtzeRiver	-	Wang et al. 2025
Eriocheir sinensis_E1514_China:Shanghai,Shanghai,YangtzeRiver	-	Wang et al. 2025
Eriocheir sinensis_E1519_China:Shanghai,Shanghai,YangtzeRiver	-	Wang et al. 2025
Eriocheir sinensis_E1520_China:Shanghai,Shanghai,YangtzeRiver	-	Wang et al. 2025
Eriocheir sinensis_E1600_China:Liaoning.LiaoRiver	-	Wang et al. 2025
Eriocheir sinensis_E1602_China:Liaoning,LiaoRiver	-	Wang et al. 2025
Eriocheir sinensis_E1606_China:Liaoning,LiaoRiver	-	Wang et al. 2025
Eriocheir sinensis_E1607_China:Liaoning,LiaoRiver	-	Wang et al. 2025
Eriocheir sinensis_E1613_China:Liaoning,LiaoRiver	-	Wang et al. 2025
Erocheir japonica_EJ22_Japan:Matsue	-	This study
Eriocheir sinensis_MZ400417.1_Poland:WarmianMasurian,VistulaLagoon	MZ400417	unpublished
Eriocheir sinensis_AF105248_Taiwan:Tainan,Yongkang	AF105248	Czerniejewski et al., 2012
Eriocheir sinensis_AF279269_China:Shandong	AF279269	Czerniejewski et al., 2012
Eriocheir japonica_AF317330_Japan:Tokushima,Tokushima	AF317330	Tang et al., 2003
Eriocheir japonica_AF317331_Japan:Tokushima,Tokushima	AF317331	Tang et al., 2003
Eriocheir_sinensis_AF317333_China:Jiangsu,Gaochun	AF317333	Tang et al., 2003
Eriocheir sinensis_AF317335_China:Liaoning,Panjin	AF317335	Tang et al., 2003
Eriocheir_sinensis_AF317337_China:Zhejiang,Yueqing	AF317337	Tang et al., 2003	only haplotypes are stored on NCBI, but the number of individuals and the corresponding sampling location are given in the publication
Eriocheir_sinensis_AF435113_China:Liaoning,LiaoRiver	AF435113	Hänfling et al., 2002	only haplotypes are stored on NCBI, but the number of individuals and the corresponding sampling location are given in the publication
Eriocheir_sinensis_AF435113_4_China:Jiangsu,Nantong,YangtzeRiver	AF435113	Hänfling et al., 2002	only haplotypes are stored on NCBI, but the number of individuals and the corresponding sampling location are given in the publication
Eriocheir_sinensis_AF435113_3_China:Jiangsu,Nantong,YangtzeRiver	AF435113	Hänfling et al., 2002	only haplotypes are stored on NCBI, but the number of individuals and the corresponding sampling location are given in the publication
Eriocheir_sinensis_AF435113_2_China:Jiangsu,Nantong,YangtzeRiver	AF435113	Hänfling et al., 2002	only haplotypes are stored on NCBI, but the number of individuals and the corresponding sampling location are given in the publication
Eriocheir_sinensis_AF435113_2_China:Zhejiang,Hangzhou	AF435113	Hänfling et al., 2002	only haplotypes are stored on NCBI, but the number of individuals and the corresponding sampling location are given in the publication
Eriocheir_sinensis_AF435113_1_China:Zhejiang,Hangzhou	AF435113	Hänfling et al., 2002	only haplotypes are stored on NCBI, but the number of individuals and the corresponding sampling location are given in the publication
Eriocheir_sinensis_AF435113_3_China:Zhejiang,Hangzhou	AF435113	Hänfling et al., 2002	only haplotypes are stored on NCBI, but the number of individuals and the corresponding sampling location are given in the publication
Eriocheir_sinensis_AF435113_1_China:Jiangsu,Nantong,YangtzeRiver	AF435113	Hänfling et al., 2002	only haplotypes are stored on NCBI, but the number of individuals and the corresponding sampling location are given in the publication
Eriocheir_sinensis_AF435114_1_China:Liaoning,LiaoRiver	AF435114	Hänfling et al., 2002	only haplotypes are stored on NCBI, but the number of individuals and the corresponding sampling location are given in the publication
Eriocheir_sinensis_AF435114_2_China:Liaoning,LiaoRiver	AF435114	Hänfling et al., 2002	only haplotypes are stored on NCBI, but the number of individuals and the corresponding sampling location are given in the publication
Eriocheir_sinensis_AF435114_2_China:Zhejiang,Hangzhou	AF435114	Hänfling et al., 2002	only haplotypes are stored on NCBI, but the number of individuals and the corresponding sampling location are given in the publication
Eriocheir_sinensis_AF435114_5_China:Liaoning,LiaoRiver	AF435114	Hänfling et al., 2002	only haplotypes are stored on NCBI, but the number of individuals and the corresponding sampling location are given in the publication
Eriocheir_sinensis_AF435114_3_China:Liaoning,LiaoRiver	AF435114	Hänfling et al., 2002	only haplotypes are stored on NCBI, but the number of individuals and the corresponding sampling location are given in the publication
Eriocheir_sinensis_AF435114_1_China:Jiangsu,Nantong,YangtzeRiver	AF435114	Hänfling et al., 2002	only haplotypes are stored on NCBI, but the number of individuals and the corresponding sampling location are given in the publication
Eriocheir_sinensis_AF435114_1_China:Zhejiang,Hangzhou	AF435114	Hänfling et al., 2002	only haplotypes are stored on NCBI, but the number of individuals and the corresponding sampling location are given in the publication
Eriocheir_sinensis_AF435114_2_China:Jiangsu,Nantong,YangtzeRiver	AF435114	Hänfling et al., 2002	only haplotypes are stored on NCBI, but the number of individuals and the corresponding sampling location are given in the publication
Eriocheir_sinensis_AF435114_3_China:Jiangsu,Nantong,YangtzeRiver	AF435114	Hänfling et al., 2002	only haplotypes are stored on NCBI, but the number of individuals and the corresponding sampling location are given in the publication
Eriocheir_sinensis_AF435114_4_China:Liaoning,LiaoRiver	AF435114	Hänfling et al., 2002	only haplotypes are stored on NCBI, but the number of individuals and the corresponding sampling location are given in the publication
Eriocheir_sinensis_AF435115_2_China:Liaoning,LiaoRiver	AF435115	Hänfling et al., 2002	only haplotypes are stored on NCBI, but the number of individuals and the corresponding sampling location are given in the publication
Eriocheir_sinensis_AF435115_1_China:Liaoning,LiaoRiver	AF435115	Hänfling et al., 2002	only haplotypes are stored on NCBI, but the number of individuals and the corresponding sampling location are given in the publication
Eriocheir_sinensis_AF435117_China:Zhejiang,Hangzhou	AF435117	Hänfling et al., 2002	only haplotypes are stored on NCBI, but the number of individuals and the corresponding sampling location are given in the publication
Eriocheir_sinensis_AF435117_China:Jiangsu,Nantong,YangtzeRiver	AF435117	Hänfling et al., 2002	only haplotypes are stored on NCBI, but the number of individuals and the corresponding sampling location are given in the publication
Eriocheir_sinensis_AF435119_2_China:Jiangsu,Nantong,YangtzeRiver	AF435119	Hänfling et al., 2002	only haplotypes are stored on NCBI, but the number of individuals and the corresponding sampling location are given in the publication
Eriocheir_sinensis_AF435119_1_China:Jiangsu,Nantong,YangtzeRiver	AF435119	Hänfling et al., 2002	only haplotypes are stored on NCBI, but the number of individuals and the corresponding sampling location are given in the publication
Eriocheir_sinensis_AF516702_1_China:YangtzeRiver	AF516702	Chu et al., 2001
Eriocheir_sinensis_AF516702_2_China:YangtzeRiver	AF516702	Chu et al., 2001
Eriocheir_sinensis_AF516702_3_China:YangtzeRiver	AF516702	Chu et al., 2001
Eriocheir_sinensis_AF516702_4_China:YangtzeRiver	AF516702	Chu et al., 2001
Eriocheir hepuensis_FJ476104.1_China	FJ476104.1	Zhang et al., 2009
Eriocheir hepuensis_FJ476105.1_China	FJ476105.1	Zhang et al., 2009
Eriocheir hepuensis_FJ476106.1_China	FJ476106.1	Zhang et al., 2009
Eriocheir hepuensis_FJ476107.1_China	FJ476107.1	Zhang et al., 2009
Eriocheir hepuensis_FJ476108.1_China	FJ476108.1	Zhang et al., 2009
Eriocheir hepuensis_FJ476109.1_China	FJ476109.1	Zhang et al., 2009
Eriocheir hepuensis_FJ476110.1_China	FJ476110.1	Zhang et al., 2009
Eriocheir hepuensis_FJ476111.1_China	FJ476111.1	Zhang et al., 2009
Eriocheir sinensis_FJ455507.1_China:YangtzeRiver	FJ455507	Wang et al. 2016
Eriocheir sinensis_FJ476080.1_China	FJ476080.1	Chu et al., 2001
Eriocheir sinensis_FJ476081.1_China	FJ476081.1	Chu et al., 2001
Eriocheir sinensis_FJ476082.1_China	FJ476082.1	Chu et al., 2001
Eriocheir sinensis_FJ476083.1_China	FJ476083.1	Chu et al., 2001
Eriocheir sinensis_FJ476084.1_China	FJ476084.1	Chu et al., 2001
Eriocheir sinensis_FJ476085.1_China	FJ476085.1	Chu et al., 2001
Eriocheir sinensis_FJ476086.1_China	FJ476086.1	Chu et al., 2001
Eriocheir sinensis_FJ476087.1_China	FJ476087.1	Chu et al., 2001
Eriocheir sinensis_FJ476088.1_China	FJ476088.1	Chu et al., 2001
Eriocheir sinensis_FJ476089.1_China	FJ476089.1	Chu et al., 2001
Eriocheir sinensis_FJ476090.1_China	FJ476090.1	Chu et al., 2001
Eriocheir sinensis_FJ476091.1_China	FJ476091.1	Chu et al., 2001
Eriocheir sinensis_FJ476092.1_China	FJ476092.1	Chu et al., 2001
Eriocheir sinensis_FJ476093.1_China	FJ476093.1	Chu et al., 2001
Eriocheir sinensis_FJ476094.1_China	FJ476094.1	Chu et al., 2001
Eriocheir sinensis_FJ476095.1_China	FJ476095.1	Chu et al., 2001
Eriocheir sinensis_FJ476096.1_China	FJ476096.1	Chu et al., 2001
Eriocheir sinensis_FJ476097.1_China	FJ476097.1	Chu et al., 2001
Eriocheir sinensis_FJ476098.1_China	FJ476098.1	Chu et al., 2001
Eriocheir sinensis_FJ476099.1_China	FJ476099.1	Chu et al., 2001
Eriocheir sinensis_FJ476100.1_China	FJ476100.1	Chu et al., 2001
Eriocheir sinensis_FJ476101.1_China	FJ476101.1	Chu et al., 2001
Eriocheir sinensis_FJ476102.1_China	FJ476102.1	Chu et al., 2001
Eriocheir sinensis_FJ476103.1_China	FJ476103.1	Chu et al., 2001
Eriocheir sinensis_PP728434.1_China	PP728434	unpublished
Eriocheir sinensis_AY640055.1_8_SouthKorea:Jeollabuk,Geumgang	AY640055.1	Xu et al. 2009	only haplotypes are stored on NCBI, but the number of individuals and the corresponding sampling location are given in the publication
Eriocheir sinensis_AY640055.1_5_China:Zhejiang,OujiangRiver	AY640055.1	Xu et al. 2009	only haplotypes are stored on NCBI, but the number of individuals and the corresponding sampling location are given in the publication
Eriocheir sinensis_AY640055.1_4_China:Zhejiang,OujiangRiver	AY640055.1	Xu et al. 2009	only haplotypes are stored on NCBI, but the number of individuals and the corresponding sampling location are given in the publication
Eriocheir sinensis_AY640055.1_5_China:Fujian,Tongan	AY640055.1	Xu et al. 2009	only haplotypes are stored on NCBI, but the number of individuals and the corresponding sampling location are given in the publication
Eriocheir sinensis_AY640055.1_3_China:Zhejiang,OujiangRiver	AY640055.1	Xu et al. 2009	only haplotypes are stored on NCBI, but the number of individuals and the corresponding sampling location are given in the publication
Eriocheir sinensis_AY640055.1_6_China:Zhejiang,OujiangRiver	AY640055.1	Xu et al. 2009	only haplotypes are stored on NCBI, but the number of individuals and the corresponding sampling location are given in the publication
Eriocheir sinensis_AY640055.1_3_China:Jiangsu,YangtzeRiver	AY640055.1	Xu et al. 2009	only haplotypes are stored on NCBI, but the number of individuals and the corresponding sampling location are given in the publication
Eriocheir sinensis_AY640055.1_1_China:Zhejiang,OujiangRiver	AY640055.1	Xu et al. 2009	only haplotypes are stored on NCBI, but the number of individuals and the corresponding sampling location are given in the publication
Eriocheir sinensis_AY640055.1_7_SouthKorea:Jeollabuk,Geumgang	AY640055.1	Xu et al. 2009	only haplotypes are stored on NCBI, but the number of individuals and the corresponding sampling location are given in the publication
Eriocheir sinensis_AY640055.1_3_China:Fujian,Tongan	AY640055.1	Xu et al. 2009	only haplotypes are stored on NCBI, but the number of individuals and the corresponding sampling location are given in the publication
Eriocheir sinensis_AY640055.1_1_China:Jiangsu,YangtzeRiver	AY640055.1	Xu et al. 2009	only haplotypes are stored on NCBI, but the number of individuals and the corresponding sampling location are given in the publication
Eriocheir sinensis_AY640055.1_2_China:Zhejiang,Feiyunjiang	AY640055.1	Xu et al. 2009	only haplotypes are stored on NCBI, but the number of individuals and the corresponding sampling location are given in the publication
Eriocheir sinensis_AY640055.1_1_China:Zhejiang,Feiyunjiang	AY640055.1	Xu et al. 2009	only haplotypes are stored on NCBI, but the number of individuals and the corresponding sampling location are given in the publication
Eriocheir sinensis_AY640055.1_4_China:Jiangsu,YangtzeRiver	AY640055.1	Xu et al. 2009	only haplotypes are stored on NCBI, but the number of individuals and the corresponding sampling location are given in the publication
Eriocheir sinensis_AY640055.1_2_China:Zhejiang,OujiangRiver	AY640055.1	Xu et al. 2009	only haplotypes are stored on NCBI, but the number of individuals and the corresponding sampling location are given in the publication
Eriocheir sinensis_AY640055.1_2_SouthKorea:Jeollabuk,Geumgang	AY640055.1	Xu et al. 2009	only haplotypes are stored on NCBI, but the number of individuals and the corresponding sampling location are given in the publication
Eriocheir sinensis_AY640055.1_2_China:Jiangsu,YangtzeRiver	AY640055.1	Xu et al. 2009	only haplotypes are stored on NCBI, but the number of individuals and the corresponding sampling location are given in the publication
Eriocheir sinensis_AY640055.1_6_China:Fujian,Tongan	AY640055.1	Xu et al. 2009	only haplotypes are stored on NCBI, but the number of individuals and the corresponding sampling location are given in the publication
Eriocheir sinensis_AY640055.1_4_China:Fujian,Tongan	AY640055.1	Xu et al. 2009	only haplotypes are stored on NCBI, but the number of individuals and the corresponding sampling location are given in the publication
Eriocheir sinensis_AY640055.1_6_SouthKorea:Jeollabuk,Geumgang	AY640055.1	Xu et al. 2009	only haplotypes are stored on NCBI, but the number of individuals and the corresponding sampling location are given in the publication
Eriocheir sinensis_AY640055.1_1_SouthKorea:Jeollabuk,Geumgang	AY640055.1	Xu et al. 2009	only haplotypes are stored on NCBI, but the number of individuals and the corresponding sampling location are given in the publication
Eriocheir sinensis_AY640055.1_4_SouthKorea:Jeollabuk,Geumgang	AY640055.1	Xu et al. 2009	only haplotypes are stored on NCBI, but the number of individuals and the corresponding sampling location are given in the publication
Eriocheir sinensis_AY640055.1_5_SouthKorea:Jeollabuk,Geumgang	AY640055.1	Xu et al. 2009	only haplotypes are stored on NCBI, but the number of individuals and the corresponding sampling location are given in the publication
Eriocheir sinensis_AY640055.1_2_China:Liaoning,LiaoRiver	AY640055.1	Xu et al. 2009	only haplotypes are stored on NCBI, but the number of individuals and the corresponding sampling location are given in the publication
Eriocheir sinensis_AY640055.1_1_China:Liaoning,LiaoRiver	AY640055.1	Xu et al. 2009	only haplotypes are stored on NCBI, but the number of individuals and the corresponding sampling location are given in the publication
Eriocheir sinensis_AY640055.1_1_China:Fujian,Tongan	AY640055.1	Xu et al. 2009	only haplotypes are stored on NCBI, but the number of individuals and the corresponding sampling location are given in the publication
Eriocheir sinensis_AY640055.1_9_SouthKorea:Jeollabuk,Geumgang Copy	AY640055.1	Xu et al. 2009	only haplotypes are stored on NCBI, but the number of individuals and the corresponding sampling location are given in the publication
Eriocheir sinensis_AY640056.1_2_China:Liaoning,LiaoRiver	AY640056.1	Xu et al. 2009	only haplotypes are stored on NCBI, but the number of individuals and the corresponding sampling location are given in the publication
Eriocheir sinensis_AY640056.1_1_China:Liaoning,LiaoRiver	AY640056.1	Xu et al. 2009	only haplotypes are stored on NCBI, but the number of individuals and the corresponding sampling location are given in the publication
Eriocheir sinensis_AY640056.1_1_China:Jiangsu,YangtzeRiver	AY640056.1	Xu et al. 2009	only haplotypes are stored on NCBI, but the number of individuals and the corresponding sampling location are given in the publication
Eriocheir sinensis_AY640056.1_4_China:Liaoning,LiaoRiver	AY640056.1	Xu et al. 2009	only haplotypes are stored on NCBI, but the number of individuals and the corresponding sampling location are given in the publication
Eriocheir sinensis_AY640056.1_2_China:Zhejiang,Feiyunjiang	AY640056.1	Xu et al. 2009	only haplotypes are stored on NCBI, but the number of individuals and the corresponding sampling location are given in the publication
Eriocheir sinensis_AY640056.1_3_China:Liaoning,LiaoRiver	AY640056.1	Xu et al. 2009	only haplotypes are stored on NCBI, but the number of individuals and the corresponding sampling location are given in the publication
Eriocheir sinensis_AY640056.1_1_China:Zhejiang,Feiyunjiang	AY640056.1	Xu et al. 2009	only haplotypes are stored on NCBI, but the number of individuals and the corresponding sampling location are given in the publication
Eriocheir sinensis_AY640056.1_2_China:Jiangsu,YangtzeRiver	AY640056.1	Xu et al. 2009	only haplotypes are stored on NCBI, but the number of individuals and the corresponding sampling location are given in the publication
Eriocheir sinensis_AY640057.1_1_China:Jiangsu,YangtzeRiver	AY640057.1	Xu et al. 2009	only haplotypes are stored on NCBI, but the number of individuals and the corresponding sampling location are given in the publication
Eriocheir sinensis_AY640058.1_2_China:Liaoning,LiaoRiver	AY640058.1	Xu et al. 2009	only haplotypes are stored on NCBI, but the number of individuals and the corresponding sampling location are given in the publication
Eriocheir sinensis_AY640058.1_1_China:Zhejiang,Feiyunjiang	AY640058.1	Xu et al. 2009	only haplotypes are stored on NCBI, but the number of individuals and the corresponding sampling location are given in the publication
Eriocheir sinensis_AY640058.1_1_China:Liaoning,LiaoRiver	AY640058.1	Xu et al. 2009	only haplotypes are stored on NCBI, but the number of individuals and the corresponding sampling location are given in the publication
Eriocheir sinensis_AY640059.1_1_China:Zhejiang,Feiyunjiang	AY640059.1	Xu et al. 2009	only haplotypes are stored on NCBI, but the number of individuals and the corresponding sampling location are given in the publication
Eriocheir sinensis_AY640060.1_3_China:Zhejiang,OujiangRiver	AY640060.1	Xu et al. 2009	only haplotypes are stored on NCBI, but the number of individuals and the corresponding sampling location are given in the publication
Eriocheir sinensis_AY640060.1_2_China:Zhejiang,Feiyunjiang	AY640060.1	Xu et al. 2009	only haplotypes are stored on NCBI, but the number of individuals and the corresponding sampling location are given in the publication
Eriocheir sinensis_AY640060.1_5_China:Zhejiang,OujiangRiver	AY640060.1	Xu et al. 2009	only haplotypes are stored on NCBI, but the number of individuals and the corresponding sampling location are given in the publication
Eriocheir sinensis_AY640060.1_2_China:Zhejiang,OujiangRiver	AY640060.1	Xu et al. 2009	only haplotypes are stored on NCBI, but the number of individuals and the corresponding sampling location are given in the publication
Eriocheir sinensis_AY640060.1_2_China:Fujian,Tongan	AY640060.1	Xu et al. 2009	only haplotypes are stored on NCBI, but the number of individuals and the corresponding sampling location are given in the publication
Eriocheir sinensis_AY640060.1_1_China:Fujian,Tongan	AY640060.1	Xu et al. 2009	only haplotypes are stored on NCBI, but the number of individuals and the corresponding sampling location are given in the publication
Eriocheir sinensis_AY640060.1_4_China:Zhejiang,OujiangRiver	AY640060.1	Xu et al. 2009	only haplotypes are stored on NCBI, but the number of individuals and the corresponding sampling location are given in the publication
Eriocheir sinensis_AY640060.1_1_China:Zhejiang,OujiangRiver	AY640060.1	Xu et al. 2009	only haplotypes are stored on NCBI, but the number of individuals and the corresponding sampling location are given in the publication
Eriocheir sinensis_AY640061.1_1_Russia:Primorje,Vladivostock	AY640061.1	Xu et al. 2009	only haplotypes are stored on NCBI, but the number of individuals and the corresponding sampling location are given in the publication
Eriocheir sinensis_AY640061.1_2_Russia:Primorje,Vladivostock	AY640061.1	Xu et al. 2009	only haplotypes are stored on NCBI, but the number of individuals and the corresponding sampling location are given in the publication
Eriocheir sinensis_AY640061.1_3_Russia:Primorje,Vladivostock	AY640061.1	Xu et al. 2009	only haplotypes are stored on NCBI, but the number of individuals and the corresponding sampling location are given in the publication
Eriocheir sinensis_AY640062.1_3_Russia:Primorje,Vladivostock	AY640062.1	Xu et al. 2009	only haplotypes are stored on NCBI, but the number of individuals and the corresponding sampling location are given in the publication
Eriocheir sinensis_AY640062.1_7_Russia:Primorje,Vladivostock	AY640062.1	Xu et al. 2009	only haplotypes are stored on NCBI, but the number of individuals and the corresponding sampling location are given in the publication
Eriocheir sinensis_AY640062.1_6_Russia:Primorje,Vladivostock	AY640062.1	Xu et al. 2009	only haplotypes are stored on NCBI, but the number of individuals and the corresponding sampling location are given in the publication
Eriocheir sinensis_AY640062.1_5_Russia:Primorje,Vladivostock	AY640062.1	Xu et al. 2009	only haplotypes are stored on NCBI, but the number of individuals and the corresponding sampling location are given in the publication
Eriocheir sinensis_AY640062.1_4_Russia:Primorje,Vladivostock	AY640062.1	Xu et al. 2009	only haplotypes are stored on NCBI, but the number of individuals and the corresponding sampling location are given in the publication
Eriocheir sinensis_AY640062.1_1_Russia:Primorje,Vladivostock	AY640062.1	Xu et al. 2009	only haplotypes are stored on NCBI, but the number of individuals and the corresponding sampling location are given in the publication
Eriocheir sinensis_AY640062.1_2_Russia:Primorje,Vladivostock	AY640062.1	Xu et al. 2009	only haplotypes are stored on NCBI, but the number of individuals and the corresponding sampling location are given in the publication
Eriocheir japonica_AY640063.1_2_China:Zhejiang,OujiangRiver	AY640063.1	Xu et al. 2009	only haplotypes are stored on NCBI, but the number of individuals and the corresponding sampling location are given in the publication
Eriocheir japonica_AY640063.1_1_China:Zhejiang,Feiyunjiang	AY640063.1	Xu et al. 2009	only haplotypes are stored on NCBI, but the number of individuals and the corresponding sampling location are given in the publication
Eriocheir japonica_AY640063.1_3_China:Zhejiang,OujiangRiver	AY640063.1	Xu et al. 2009	only haplotypes are stored on NCBI, but the number of individuals and the corresponding sampling location are given in the publication
Eriocheir japonica_AY640063.1_1_China:Zhejiang,OujiangRiver	AY640063.1	Xu et al. 2009	only haplotypes are stored on NCBI, but the number of individuals and the corresponding sampling location are given in the publication
Eriocheir japonica_AY640063.1_2_China:Zhejiang,Feiyunjiang	AY640063.1	Xu et al. 2009	only haplotypes are stored on NCBI, but the number of individuals and the corresponding sampling location are given in the publication
Eriocheir japonica_AY640064.1_China:Zhejiang,OujiangRiver	AY640064.1	Xu et al. 2009	only haplotypes are stored on NCBI, but the number of individuals and the corresponding sampling location are given in the publication
Eriocheir japonica_AY640065.1_1_Taiwan:Taipeh,Tamshui	AY640065.1	Xu et al. 2009	only haplotypes are stored on NCBI, but the number of individuals and the corresponding sampling location are given in the publication
Eriocheir japonica_AY640065.1_1_China:Guangdong,Aotou	AY640065.1	Xu et al. 2009	only haplotypes are stored on NCBI, but the number of individuals and the corresponding sampling location are given in the publication
Eriocheir japonica_AY640065.1_2_China:Guangxi,Hepu	AY640065.1	Xu et al. 2009	only haplotypes are stored on NCBI, but the number of individuals and the corresponding sampling location are given in the publication
Eriocheir japonica_AY640065.1_4_China:Guangxi,Hepu	AY640065.1	Xu et al. 2009	only haplotypes are stored on NCBI, but the number of individuals and the corresponding sampling location are given in the publication
Eriocheir japonica_AY640065.1_4_Taiwan:Taipeh,Tamshui	AY640065.1	Xu et al. 2009	only haplotypes are stored on NCBI, but the number of individuals and the corresponding sampling location are given in the publication
Eriocheir japonica_AY640065.1_3_China:Zhejiang,OujiangRiver	AY640065.1	Xu et al. 2009	only haplotypes are stored on NCBI, but the number of individuals and the corresponding sampling location are given in the publication
Eriocheir japonica_AY640065.1_5_Taiwan:Taipeh,Tamshui	AY640065.1	Xu et al. 2009	only haplotypes are stored on NCBI, but the number of individuals and the corresponding sampling location are given in the publication
Eriocheir japonica_AY640065.1_1_China:Zhejiang,OujiangRiver	AY640065.1	Xu et al. 2009	only haplotypes are stored on NCBI, but the number of individuals and the corresponding sampling location are given in the publication
Eriocheir japonica_AY640065.1_2_China:Guangdong,Aotou	AY640065.1	Xu et al. 2009	only haplotypes are stored on NCBI, but the number of individuals and the corresponding sampling location are given in the publication
Eriocheir japonica_AY640065.1_China:Guangxi,Hepu	AY640065.1	Xu et al. 2009	only haplotypes are stored on NCBI, but the number of individuals and the corresponding sampling location are given in the publication
Eriocheir japonica_AY640065.1_2_China:Zhejiang,OujiangRiver	AY640065.1	Xu et al. 2009	only haplotypes are stored on NCBI, but the number of individuals and the corresponding sampling location are given in the publication
Eriocheir japonica_AY640065.1_China:Guangdong,Aotou	AY640065.1	Xu et al. 2009	only haplotypes are stored on NCBI, but the number of individuals and the corresponding sampling location are given in the publication
Eriocheir japonica_AY640065.1_3_China:Guangxi,Hepu	AY640065.1	Xu et al. 2009	only haplotypes are stored on NCBI, but the number of individuals and the corresponding sampling location are given in the publication
Eriocheir japonica_AY640065.1_3_Taiwan:Taipeh,Tamshui	AY640065.1	Xu et al. 2009	only haplotypes are stored on NCBI, but the number of individuals and the corresponding sampling location are given in the publication
Eriocheir japonica_AY640065.1_1_China:Guangdong,ZhujiangRiver	AY640065.1	Xu et al. 2009	only haplotypes are stored on NCBI, but the number of individuals and the corresponding sampling location are given in the publication
Eriocheir japonica_AY640065.1_2_China:Guangdong,ZhujiangRiver	AY640065.1	Xu et al. 2009	only haplotypes are stored on NCBI, but the number of individuals and the corresponding sampling location are given in the publication
Eriocheir japonica_AY640065.1_2_Taiwan:Taipeh,Tamshui	AY640065.1	Xu et al. 2009	only haplotypes are stored on NCBI, but the number of individuals and the corresponding sampling location are given in the publication
Eriocheir japonica_AY640065.1_3_China:Guangdong,Aotou	AY640065.1	Xu et al. 2009	only haplotypes are stored on NCBI, but the number of individuals and the corresponding sampling location are given in the publication
Eriocheir japonica_AY640065.1_1_China:Guangxi,Hepu	AY640065.1	Xu et al. 2009	only haplotypes are stored on NCBI, but the number of individuals and the corresponding sampling location are given in the publication
Eriocheir japonica_AY640065.1_China:Fujian,Tongan	AY640065.1	Xu et al. 2009	only haplotypes are stored on NCBI, but the number of individuals and the corresponding sampling location are given in the publication
Eriocheir japonica_AY640065.1_China:Zhejiang,Feiyunjiang	AY640065.1	Xu et al. 2009	only haplotypes are stored on NCBI, but the number of individuals and the corresponding sampling location are given in the publication
Eriocheir japonica_AY640066.1_2_China:Guangxi,Hepu	AY640066.1	Xu et al. 2009	only haplotypes are stored on NCBI, but the number of individuals and the corresponding sampling location are given in the publication
Eriocheir japonica_AY640066.1_1_China:Guangxi,Hepu	AY640066.1	Xu et al. 2009	only haplotypes are stored on NCBI, but the number of individuals and the corresponding sampling location are given in the publication
Eriocheir japonica_AY640067.1_China:Fujian,Tongan	AY640067.1	Xu et al. 2009	only haplotypes are stored on NCBI, but the number of individuals and the corresponding sampling location are given in the publication
Eriocheir japonica_AY640067.1_China:Zhejiang,OujiangRiver	AY640067.1	Xu et al. 2009	only haplotypes are stored on NCBI, but the number of individuals and the corresponding sampling location are given in the publication
Eriocheir japonica_AY640068.1_China:Guangdong,Aotou	AY640068.1	Xu et al. 2009	only haplotypes are stored on NCBI, but the number of individuals and the corresponding sampling location are given in the publication
Eriocheir japonica_AY640068.1_2_China:Guangdong,ZhujiangRiver	AY640068.1	Xu et al. 2009	only haplotypes are stored on NCBI, but the number of individuals and the corresponding sampling location are given in the publication
Eriocheir japonica_AY640068.1_1_China:Guangdong,ZhujiangRiver	AY640068.1	Xu et al. 2009	only haplotypes are stored on NCBI, but the number of individuals and the corresponding sampling location are given in the publication
Eriocheir japonica_AY640069.1_China:Guangdong,ZhujiangRiver	AY640069.1	Xu et al. 2009	only haplotypes are stored on NCBI, but the number of individuals and the corresponding sampling location are given in the publication
Eriocheir japonica_AY640070.1_2_Japan:Okinawa	AY640070.1	Xu et al. 2009	only haplotypes are stored on NCBI, but the number of individuals and the corresponding sampling location are given in the publication
Eriocheir japonica_AY640070.1_3_Japan:Okinawa	AY640070.1	Xu et al. 2009	only haplotypes are stored on NCBI, but the number of individuals and the corresponding sampling location are given in the publication
Eriocheir japonica_AY640070.1_1_Japan:Okinawa	AY640070.1	Xu et al. 2009	only haplotypes are stored on NCBI, but the number of individuals and the corresponding sampling location are given in the publication
Eriocheir japonica_AY640071.1_4_Japan:Okinawa	AY640071.1	Xu et al. 2009	only haplotypes are stored on NCBI, but the number of individuals and the corresponding sampling location are given in the publication
Eriocheir japonica_AY640071.1_3_Japan:Okinawa	AY640071.1	Xu et al. 2009	only haplotypes are stored on NCBI, but the number of individuals and the corresponding sampling location are given in the publication
Eriocheir japonica_AY640071.1_1_Japan:Okinawa	AY640071.1	Xu et al. 2009	only haplotypes are stored on NCBI, but the number of individuals and the corresponding sampling location are given in the publication
Eriocheir japonica_AY640071.1_2_Japan:Okinawa	AY640071.1	Xu et al. 2009	only haplotypes are stored on NCBI, but the number of individuals and the corresponding sampling location are given in the publication
Eriocheir japonica_AY640072.1_Japan:Okinawa	AY640072.1	Xu et al. 2009	only haplotypes are stored on NCBI, but the number of individuals and the corresponding sampling location are given in the publication
Eriocheir japonica_AY640073.1_Japan:Okinawa	AY640073.1	Xu et al. 2009	only haplotypes are stored on NCBI, but the number of individuals and the corresponding sampling location are given in the publication
Eriocheir japonica_AY640074.1_1_Japan:Yamaguchi,Shimonoseki	AY640074.1	Xu et al. 2009	only haplotypes are stored on NCBI, but the number of individuals and the corresponding sampling location are given in the publication
Eriocheir japonica_AY640074.1_2_SoutKorea:Gyeongsangnam-do,Hamyang-gun,Seomjin	AY640074.1	Xu et al. 2009	only haplotypes are stored on NCBI, but the number of individuals and the corresponding sampling location are given in the publication
Eriocheir japonica_AY640074.1_1_SoutKorea:Gyeongsangnam-do,Hamyang-gun,Seomjin	AY640074.1	Xu et al. 2009	only haplotypes are stored on NCBI, but the number of individuals and the corresponding sampling location are given in the publication
Eriocheir japonica_AY640074.1_2_Japan:Yamaguchi,Shimonoseki	AY640074.1	Xu et al. 2009	only haplotypes are stored on NCBI, but the number of individuals and the corresponding sampling location are given in the publication
Eriocheir japonica_AY640074.1_3_SoutKorea:Gyeongsangnam-do,Hamyang-gun,Seomjin	AY640074.1	Xu et al. 2009	only haplotypes are stored on NCBI, but the number of individuals and the corresponding sampling location are given in the publication
Eriocheir japonica_AY640074.1_4_SoutKorea:Gyeongsangnam-do,Hamyang-gun,Seomjin	AY640074.1	Xu et al. 2009	only haplotypes are stored on NCBI, but the number of individuals and the corresponding sampling location are given in the publication
Eriocheir japonica_AY640075.1_3_Japan:Chiba,Chiba	AY640075.1	Xu et al. 2009	only haplotypes are stored on NCBI, but the number of individuals and the corresponding sampling location are given in the publication
Eriocheir japonica_AY640075.1_1_Japan:Chiba,Chiba	AY640075.1	Xu et al. 2009	only haplotypes are stored on NCBI, but the number of individuals and the corresponding sampling location are given in the publication
Eriocheir japonica_AY640075.1_1_Japan:Yamaguchi,Shimonoseki	AY640075.1	Xu et al. 2009	only haplotypes are stored on NCBI, but the number of individuals and the corresponding sampling location are given in the publication
Eriocheir japonica_AY640075.1_4_Japan:Chiba,Chiba	AY640075.1	Xu et al. 2009	only haplotypes are stored on NCBI, but the number of individuals and the corresponding sampling location are given in the publication
Eriocheir japonica_AY640075.1_2_Japan:Yamaguchi,Shimonoseki	AY640075.1	Xu et al. 2009	only haplotypes are stored on NCBI, but the number of individuals and the corresponding sampling location are given in the publication
Eriocheir japonica_AY640075.1_2_Japan:Chiba,Chiba	AY640075.1	Xu et al. 2009	only haplotypes are stored on NCBI, but the number of individuals and the corresponding sampling location are given in the publication
Eriocheir japonica_AY640076.1_2_Japan:Yamaguchi,Shimonoseki	AY640076.1	Xu et al. 2009	only haplotypes are stored on NCBI, but the number of individuals and the corresponding sampling location are given in the publication
Eriocheir japonica_AY640076.1_3_Japan:Yamaguchi,Shimonoseki	AY640076.1	Xu et al. 2009	only haplotypes are stored on NCBI, but the number of individuals and the corresponding sampling location are given in the publication
Eriocheir japonica_AY640076.1_Japan:Chiba,Chiba	AY640076.1	Xu et al. 2009	only haplotypes are stored on NCBI, but the number of individuals and the corresponding sampling location are given in the publication
Eriocheir japonica_AY640076.1_1_Japan:Yamaguchi,Shimonoseki	AY640076.1	Xu et al. 2009	only haplotypes are stored on NCBI, but the number of individuals and the corresponding sampling location are given in the publication
Eriocheir japonica_AY640076.1_4_Japan:Yamaguchi,Shimonoseki	AY640076.1	Xu et al. 2009	only haplotypes are stored on NCBI, but the number of individuals and the corresponding sampling location are given in the publication
Eriocheir japonica_AY640077.1_Japan:Yamaguchi,Shimonoseki	AY640077.1	Xu et al. 2009	only haplotypes are stored on NCBI, but the number of individuals and the corresponding sampling location are given in the publication
Eriocheir japonica_AY640078.1_SoutKorea:Gyeongsangnam-do,Hamyang-gun,Seomjin	AY640078.1	Xu et al. 2009	only haplotypes are stored on NCBI, but the number of individuals and the corresponding sampling location are given in the publication
Eriocheir japonica_AY640080.1_Russia:Primorje,Vladivostock	AY640080.1	Xu et al. 2009	only haplotypes are stored on NCBI, but the number of individuals and the corresponding sampling location are given in the publication
Eriocheir japonica_AY640081.1_1_Russia:Primorje,Vladivostock	AY640081.1	Xu et al. 2009	only haplotypes are stored on NCBI, but the number of individuals and the corresponding sampling location are given in the publication
Eriocheir japonica_AY640081.1_2_Russia:Primorje,Vladivostock	AY640081.1	Xu et al. 2009	only haplotypes are stored on NCBI, but the number of individuals and the corresponding sampling location are given in the publication
Eriocheir japonica_AY640081.1_3_Russia:Primorje,Vladivostock	AY640081.1	Xu et al. 2009	only haplotypes are stored on NCBI, but the number of individuals and the corresponding sampling location are given in the publication
Eriocheir_sinensis_AY640082_7_China:Fujian,Tongan	AY640082	Xu et al. 2009	only haplotypes are stored on NCBI, but the number of individuals and the corresponding sampling location are given in the publication
Eriocheir_sinensis_AY640082_3_China:Zhejiang,Feiyunjiang	AY640082	Xu et al. 2009	only haplotypes are stored on NCBI, but the number of individuals and the corresponding sampling location are given in the publication
Eriocheir_sinensis_AY640082_2_China:Zhejiang,Feiyunjiang	AY640082	Xu et al. 2009	only haplotypes are stored on NCBI, but the number of individuals and the corresponding sampling location are given in the publication
Eriocheir_sinensis_AY640082_1_China:Zhejiang,Feiyunjiang	AY640082	Xu et al. 2009	only haplotypes are stored on NCBI, but the number of individuals and the corresponding sampling location are given in the publication
Eriocheir_sinensis_AY640082_1_China:Fujian,Tongan	AY640082	Xu et al. 2009	only haplotypes are stored on NCBI, but the number of individuals and the corresponding sampling location are given in the publication
Eriocheir_sinensis_AY640082_3_China:Fujian,Tongan	AY640082	Xu et al. 2009	only haplotypes are stored on NCBI, but the number of individuals and the corresponding sampling location are given in the publication
Eriocheir_sinensis_AY640082_5_China:Fujian,Tongan	AY640082	Xu et al. 2009	only haplotypes are stored on NCBI, but the number of individuals and the corresponding sampling location are given in the publication
Eriocheir_sinensis_AY640082_1_China:Zhejiang,OujiangRiver	AY640082	Xu et al. 2009	only haplotypes are stored on NCBI, but the number of individuals and the corresponding sampling location are given in the publication
Eriocheir_sinensis_AY640082_10_China:Zhejiang,OujiangRiver	AY640082	Xu et al. 2009	only haplotypes are stored on NCBI, but the number of individuals and the corresponding sampling location are given in the publication
Eriocheir_sinensis_AY640082_2_China:Zhejiang,OujiangRiver	AY640082	Xu et al. 2009	only haplotypes are stored on NCBI, but the number of individuals and the corresponding sampling location are given in the publication
Eriocheir_sinensis_AY640082_11_China:Zhejiang,OujiangRiver	AY640082	Xu et al. 2009	only haplotypes are stored on NCBI, but the number of individuals and the corresponding sampling location are given in the publication
Eriocheir_sinensis_AY640082_6_China:Zhejiang,OujiangRiver	AY640082	Xu et al. 2009	only haplotypes are stored on NCBI, but the number of individuals and the corresponding sampling location are given in the publication
Eriocheir_sinensis_AY640082_China:Liaoning,LiaoRiver	AY640082	Xu et al. 2009	only haplotypes are stored on NCBI, but the number of individuals and the corresponding sampling location are given in the publication
Eriocheir_sinensis_AY640082_2_China:Fujian,Tongan	AY640082	Xu et al. 2009	only haplotypes are stored on NCBI, but the number of individuals and the corresponding sampling location are given in the publication
Eriocheir_sinensis_AY640082_6_China:Fujian,Tongan	AY640082	Xu et al. 2009	only haplotypes are stored on NCBI, but the number of individuals and the corresponding sampling location are given in the publication
Eriocheir_sinensis_AY640082_4_China:Zhejiang,Feiyunjiang	AY640082	Xu et al. 2009	only haplotypes are stored on NCBI, but the number of individuals and the corresponding sampling location are given in the publication
Eriocheir_sinensis_AY640082_1_China:Jiangsu,Zhenjiang,YangtzeRiver	AY640082	Xu et al. 2009	only haplotypes are stored on NCBI, but the number of individuals and the corresponding sampling location are given in the publication
Eriocheir_sinensis_AY640082_3_China:Jiangsu,Zhenjiang,YangtzeRiver	AY640082	Xu et al. 2009	only haplotypes are stored on NCBI, but the number of individuals and the corresponding sampling location are given in the publication
Eriocheir_sinensis_AY640082_2_China:Jiangsu,Zhenjiang,YangtzeRiver	AY640082	Xu et al. 2009	only haplotypes are stored on NCBI, but the number of individuals and the corresponding sampling location are given in the publication
Eriocheir_sinensis_AY640082_4_China:Jiangsu,Zhenjiang,YangtzeRiver	AY640082	Xu et al. 2009	only haplotypes are stored on NCBI, but the number of individuals and the corresponding sampling location are given in the publication
Eriocheir_sinensis_AY640082_5_China:Jiangsu,Zhenjiang,YangtzeRiver	AY640082	Xu et al. 2009	only haplotypes are stored on NCBI, but the number of individuals and the corresponding sampling location are given in the publication
Eriocheir_sinensis_AY640082_5_China:Zhejiang,OujiangRiver	AY640082	Xu et al. 2009	only haplotypes are stored on NCBI, but the number of individuals and the corresponding sampling location are given in the publication
Eriocheir_sinensis_AY640082_7_China:Zhejiang,OujiangRiver	AY640082	Xu et al. 2009	only haplotypes are stored on NCBI, but the number of individuals and the corresponding sampling location are given in the publication
Eriocheir_sinensis_AY640082_5_China:Zhejiang,Feiyunjiang	AY640082	Xu et al. 2009	only haplotypes are stored on NCBI, but the number of individuals and the corresponding sampling location are given in the publication
Eriocheir_sinensis_AY640082_9_China:Zhejiang,OujiangRiver	AY640082	Xu et al. 2009	only haplotypes are stored on NCBI, but the number of individuals and the corresponding sampling location are given in the publication
Eriocheir_sinensis_AY640082_3_China:Zhejiang,OujiangRiver	AY640082	Xu et al. 2009	only haplotypes are stored on NCBI, but the number of individuals and the corresponding sampling location are given in the publication
Eriocheir_sinensis_AY640082_8_China:Fujian,Tongan	AY640082	Xu et al. 2009	only haplotypes are stored on NCBI, but the number of individuals and the corresponding sampling location are given in the publication
Eriocheir_sinensis_AY640082_4_China:Zhejiang,OujiangRiver	AY640082	Xu et al. 2009	only haplotypes are stored on NCBI, but the number of individuals and the corresponding sampling location are given in the publication
Eriocheir_sinensis_AY640082_6_China:Zhejiang,Feiyunjiang	AY640082	Xu et al. 2009	only haplotypes are stored on NCBI, but the number of individuals and the corresponding sampling location are given in the publication
Eriocheir_sinensis_AY640082_8_China:Zhejiang,OujiangRiver	AY640082	Xu et al. 2009	only haplotypes are stored on NCBI, but the number of individuals and the corresponding sampling location are given in the publication
Eriocheir_sinensis_AY640082_4_China:Fujian,Tongan	AY640082	Xu et al. 2009	only haplotypes are stored on NCBI, but the number of individuals and the corresponding sampling location are given in the publication
Eriocheir sinensis_AY640083_2_China:Jiangsu,Zhenjiang,YangtzeRiver	AY640083	Xu et al., 2009	only haplotypes are stored on NCBI, but the number of individuals and the corresponding sampling location are given in the publication
Eriocheir_sinensis_AY640083_3_China:Jiangsu,Zhenjiang,YangtzeRiver	AY640083	Xu et al., 2009	only haplotypes are stored on NCBI, but the number of individuals and the corresponding sampling location are given in the publication
Eriocheir_sinensis_AY640083_1_China:Jiangsu,Zhenjiang,YangtzeRiver	AY640083	Xu et al., 2009	only haplotypes are stored on NCBI, but the number of individuals and the corresponding sampling location are given in the publication
Eriocheir_sinensis_AY640083_China:Zhejiang,Feiyunjiang	AY640083	Xu et al., 2009	only haplotypes are stored on NCBI, but the number of individuals and the corresponding sampling location are given in the publication
Eriocheir_sinensis_AY640084_5_SouthKorea:Jeollabuk,Geumgang	AY640084	Xu et al., 2009	only haplotypes are stored on NCBI, but the number of individuals and the corresponding sampling location are given in the publication
Eriocheir_sinensis_AY640084_3_SouthKorea:Jeollabuk,Geumgang	AY640084	Xu et al., 2009	only haplotypes are stored on NCBI, but the number of individuals and the corresponding sampling location are given in the publication
Eriocheir_sinensis_AY640084_8_SouthKorea:Jeollabuk,Geumgang	AY640084	Xu et al., 2009	only haplotypes are stored on NCBI, but the number of individuals and the corresponding sampling location are given in the publication
Eriocheir_sinensis_AY640084_9_SouthKorea:Jeollabuk,Geumgang	AY640084	Xu et al., 2009	only haplotypes are stored on NCBI, but the number of individuals and the corresponding sampling location are given in the publication
Eriocheir_sinensis_AY640084_4_SouthKorea:Jeollabuk,Geumgang	AY640084	Xu et al., 2009	only haplotypes are stored on NCBI, but the number of individuals and the corresponding sampling location are given in the publication
Eriocheir_sinensis_AY640084_11_SouthKorea:Jeollabuk,Geumgang	AY640084	Xu et al., 2009	only haplotypes are stored on NCBI, but the number of individuals and the corresponding sampling location are given in the publication
Eriocheir_sinensis_AY640084_2_SouthKorea:Jeollabuk,Geumgang	AY640084	Xu et al., 2009	only haplotypes are stored on NCBI, but the number of individuals and the corresponding sampling location are given in the publication
Eriocheir_sinensis_AY640084_6_SouthKorea:Jeollabuk,Geumgang	AY640084	Xu et al., 2009	only haplotypes are stored on NCBI, but the number of individuals and the corresponding sampling location are given in the publication
Eriocheir_sinensis_AY640084_10_SouthKorea:Jeollabuk,Geumgang	AY640084	Xu et al., 2009	only haplotypes are stored on NCBI, but the number of individuals and the corresponding sampling location are given in the publication
Eriocheir_sinensis_AY640084_1_SouthKorea:Jeollabuk,Geumgang	AY640084	Xu et al., 2009	only haplotypes are stored on NCBI, but the number of individuals and the corresponding sampling location are given in the publication
Eriocheir_sinensis_AY640084_7_SouthKorea:Jeollabuk,Geumgang	AY640084	Xu et al., 2009	only haplotypes are stored on NCBI, but the number of individuals and the corresponding sampling location are given in the publication
Eriocheir_sinensis_AY640085_1_China:Zhejiang,Feiyunjiang	AY640085	Xu et al., 2009	only haplotypes are stored on NCBI, but the number of individuals and the corresponding sampling location are given in the publication
Eriocheir_sinensis_AY640085_3_China:Zhejiang,Feiyunjiang	AY640085	Xu et al., 2009	only haplotypes are stored on NCBI, but the number of individuals and the corresponding sampling location are given in the publication
Eriocheir_sinensis_AY640085_2_China:Zhejiang,Feiyunjiang	AY640085	Xu et al., 2009	only haplotypes are stored on NCBI, but the number of individuals and the corresponding sampling location are given in the publication
Eriocheir_sinensis_AY640086_1_Russia:Primorje,Vladivostok	AY640086	Xu et al., 2009	only haplotypes are stored on NCBI, but the number of individuals and the corresponding sampling location are given in the publication
Eriocheir_sinensis_AY640086_2_Russia:Primorje,Vladivostok	AY640086	Xu et al., 2009	only haplotypes are stored on NCBI, but the number of individuals and the corresponding sampling location are given in the publication
Eriocheir_sinensis_AY640086_3_Russia:Primorje,Vladivostok	AY640086	Xu et al., 2009	only haplotypes are stored on NCBI, but the number of individuals and the corresponding sampling location are given in the publication
Eriocheir_sinensis_AY640087_2_Russia:Primorje,Vladivostok	AY640087	Xu et al., 2009	only haplotypes are stored on NCBI, but the number of individuals and the corresponding sampling location are given in the publication
Eriocheir_sinensis_AY640087_3_Russia:Primorje,Vladivostok	AY640087	Xu et al., 2009	only haplotypes are stored on NCBI, but the number of individuals and the corresponding sampling location are given in the publication
Eriocheir_sinensis_AY640087_5_Russia:Primorje,Vladivostok	AY640087	Xu et al., 2009	only haplotypes are stored on NCBI, but the number of individuals and the corresponding sampling location are given in the publication
Eriocheir_sinensis_AY640087_4_Russia:Primorje,Vladivostok	AY640087	Xu et al., 2009	only haplotypes are stored on NCBI, but the number of individuals and the corresponding sampling location are given in the publication
Eriocheir_sinensis_AY640087_6_Russia:Primorje,Vladivostok	AY640087	Xu et al., 2009	only haplotypes are stored on NCBI, but the number of individuals and the corresponding sampling location are given in the publication
Eriocheir_sinensis_AY640087_7_Russia:Primorje,Vladivostok	AY640087	Xu et al., 2009	only haplotypes are stored on NCBI, but the number of individuals and the corresponding sampling location are given in the publication
Eriocheir_sinensis_AY640087_1_Russia:Primorje,Vladivostok	AY640087	Xu et al., 2009	only haplotypes are stored on NCBI, but the number of individuals and the corresponding sampling location are given in the publication
Eriocheir_japonica_AY640095_Japan:Yamaguchi,Shimonoseki	AY640095	Xu et al., 2009	only haplotypes are stored on NCBI, but the number of individuals and the corresponding sampling location are given in the publication
Eriocheir_japonica_AY640096_Japan:Yamaguchi,Shimonoseki	AY640096	Xu et al., 2010	only haplotypes are stored on NCBI, but the number of individuals and the corresponding sampling location are given in the publication
Eriocheir_japonica_AY640097_Japan:Yamaguchi,Shimonoseki	AY640097	Xu et al., 2011	only haplotypes are stored on NCBI, but the number of individuals and the corresponding sampling location are given in the publication
Eriocheir_japonica_AY640098_Japan:Yamaguchi,Shimonoseki	AY640098	Xu et al., 2012	only haplotypes are stored on NCBI, but the number of individuals and the corresponding sampling location are given in the publication
Eriocheir_japonica_AY640099_Japan:Yamaguchi,Shimonoseki	AY640099	Xu et al., 2013	only haplotypes are stored on NCBI, but the number of individuals and the corresponding sampling location are given in the publication
Eriocheir_japonica_AY640100_Japan:Yamaguchi,Shimonoseki	AY640100	Xu et al., 2014	only haplotypes are stored on NCBI, but the number of individuals and the corresponding sampling location are given in the publication
Eriocheir_japonica_AY640101_2_Russia:Primorje,Vladivostok	AY640101	Xu et al., 2015	only haplotypes are stored on NCBI, but the number of individuals and the corresponding sampling location are given in the publication
Eriocheir_japonica_AY640101_6_SouthKorea:Gyeongsangnam-do,Hamyang-gun,Seomjin	AY640101	Xu et al., 2016	only haplotypes are stored on NCBI, but the number of individuals and the corresponding sampling location are given in the publication
Eriocheir_japonica_AY640101_2_SouthKorea:Gyeongsangnam-do,Hamyang-gun,Seomjin	AY640101	Xu et al., 2017	only haplotypes are stored on NCBI, but the number of individuals and the corresponding sampling location are given in the publication
Eriocheir_japonica_AY640101_Japan:Chiba,Chiba	AY640101	Xu et al., 2018	only haplotypes are stored on NCBI, but the number of individuals and the corresponding sampling location are given in the publication
Eriocheir_japonica_AY640101_1_SouthKorea:Gyeongsangnam-do,Hamyang-gun,Seomjin	AY640101	Xu et al., 2019	only haplotypes are stored on NCBI, but the number of individuals and the corresponding sampling location are given in the publication
Eriocheir_japonica_AY640101_3_SouthKorea:Gyeongsangnam-do,Hamyang-gun,Seomjin	AY640101	Xu et al., 2020	only haplotypes are stored on NCBI, but the number of individuals and the corresponding sampling location are given in the publication
Eriocheir_japonica_AY640101_4_SouthKorea:Gyeongsangnam-do,Hamyang-gun,Seomjin	AY640101	Xu et al., 2021	only haplotypes are stored on NCBI, but the number of individuals and the corresponding sampling location are given in the publication
Eriocheir_japonica_AY640101_5_SouthKorea:Gyeongsangnam-do,Hamyang-gun,Seomjin	AY640101	Xu et al., 2022	only haplotypes are stored on NCBI, but the number of individuals and the corresponding sampling location are given in the publication
Eriocheir_japonica_AY640101_1_Russia:Primorje,Vladivostok	AY640101	Xu et al., 2023	only haplotypes are stored on NCBI, but the number of individuals and the corresponding sampling location are given in the publication
Eriocheir_japonica_AY640102_Russia:Primorje,Vladivostok	AY640102	Xu et al., 2024	only haplotypes are stored on NCBI, but the number of individuals and the corresponding sampling location are given in the publication
Eriocheir japonica_DQ114142.1_China:Liaoning,Dandong,Yalu	DQ114142.1	Sun et al., 2005a
Eriocheir japonica_DQ114143.1_China:Shanghai,Chongming	DQ114143.1	Sun et al., 2005a
Eriocheir japonica_DQ114144.1_China:Anhui,Tongling,YangtzeRiver	DQ114144.1	Sun et al., 2005a
Eriocheir japonica_DQ114145.1_China:Liaoning,Panjin	DQ114145.1	Sun et al., 2005a
Eriocheir japonica_DQ114146.1_China:Liaoning,Dandong,Yalu	DQ114146.1	Sun et al., 2005a
Eriocheir japonica_DQ114147.1_China:Liaoning,Dandong,Yalu	DQ114147.1	Sun et al., 2005a
Eriocheir japonica_DQ114148.1_China:Liaoning,Dandong,Yalu	DQ114148.1	Sun et al., 2005a
Eriocheir japonica_DQ114149.1_China:Anhui,Tongling,YangtzeRiver	DQ114149.1	Sun et al., 2005a
Eriocheir japonica_DQ114150.1_China:Shanghai,Chongming	DQ114150.1	Sun et al., 2005a
Eriocheir japonica_DQ114151.1_China:Liaoning,Dandong,Yalu	DQ114151.1	Sun et al., 2005a
Eriocheir japonica_DQ114152.1_China:Jiangsu,Zhenjiang,YangtzeRiver	DQ114152.1	Sun et al., 2005a
Eriocheir japonica_DQ114153.1_China:OujiangRiver	DQ114153.1	Sun et al., 2005a
Eriocheir japonica_DQ114154.1_China:Shanghai,Chongming	DQ114154.1	Sun et al., 2005a
Eriocheir japonica_DQ114155.1_China:Anhui,Tongling,YangtzeRiver	DQ114155.1	Sun et al., 2005a
Eriocheir japonica_DQ114156.1_China:Liaoning,Panjin	DQ114156.1	Sun et al., 2005a
Eriocheir japonica_DQ114157.1_China:Jiangsu,Zhenjiang,YangtzeRiver	DQ114157.1	Sun et al., 2005a
Eriocheir japonica_DQ114158.1_China:Anhui,Tongling,YangtzeRiver	DQ114158.1	Sun et al., 2005a
Eriocheir japonica_DQ114159.1_China:Zhejiang,Qingtian,OujiangRiver	DQ114159.1	Sun et al., 2005a
Eriocheir japonica_DQ114160.1_China:Jiangsu,Nanjing,YangtzeRiver	DQ114160.1	Sun et al., 2005a
Eriocheir japonica_DQ114161.1_China:Zhejiang,Qingtian,OujiangRiver	DQ114161.1	Sun et al., 2005a
Eriocheir japonica_DQ114162.1_China:Anhui,Tongling,YangtzeRiver	DQ114162.1	Sun et al., 2005a
Eriocheir japonica_DQ114163.1_China:Jiangsu,Zhenjiang,YangtzeRiver	DQ114163.1	Sun et al., 2005a
Eriocheir japonica_DQ114164.1_China:Anhui,Tongling,YangtzeRiver	DQ114164.1	Sun et al., 2005a
Eriocheir japonica_DQ114165.1_China:Anhui,Tongling,YangtzeRiver	DQ114165.1	Sun et al., 2005a
Eriocheir japonica_DQ114166.1_China:Jiangsu,Zhenjiang,YangtzeRiver	DQ114166.1	Sun et al., 2005a
Eriocheir japonica_DQ114167.1_China:Liaoning,Panjin	DQ114167.1	Sun et al., 2005a
Eriocheir japonica_DQ114168.1_China:Jiangsu,Qidong	DQ114168.1	Sun et al., 2005a
Eriocheir japonica_DQ114169.1_China:Guangdong,Zhanjiang,YoungRiver	DQ114169.1	Sun et al., 2005a
Eriocheir japonica_DQ114170.1_China:Anhui,Tongling,YangtzeRiver	DQ114170.1	Sun et al., 2005a
Eriocheir japonica_DQ114171.1_China:Jiangsu,Zhenjiang,YangtzeRiver	DQ114171.1	Sun et al., 2005a
Eriocheir japonica_DQ114172.1_China:Jiangsu,Nanjing,YangtzeRiver	DQ114172.1	Sun et al., 2005a
Eriocheir japonica_DQ114173.1_China:Jiangsu,Zhenjiang,YangtzeRiver	DQ114173.1	Sun et al., 2005a
Eriocheir japonica_DQ114174.1_China:Anhui,Tongling,YangtzeRiver	DQ114174.1	Sun et al., 2005a
Eriocheir japonica_DQ114175.1_China:Jiangsu,Zhenjiang,YangtzeRiver	DQ114175.1	Sun et al., 2005a
Eriocheir japonica_DQ114176.1_China:Anhui,Tongling,YangtzeRiver	DQ114176.1	Sun et al., 2005a
Eriocheir japonica_DQ114177.1_China:Jiangsu,Zhenjiang,YangtzeRiver	DQ114177.1	Sun et al., 2005a
Eriocheir japonica_DQ114178.1_China:Shanghai,Chongming	DQ114178.1	Sun et al., 2005a
Eriocheir japonica_DQ114179.1_China:Jiangsu,Lianyungang	DQ114179.1	Sun et al., 2005a
Eriocheir japonica_DQ114180.1_China:Anhui,Chuzhou	DQ114180.1	Sun et al., 2005a
Eriocheir japonica_DQ114181.1_China:Anhui,Chuzhou	DQ114181.1	Sun et al., 2005a
Eriocheir japonica_DQ114182.1_China:Shanghai,Chongming	DQ114182.1	Sun et al., 2005a
Eriocheir japonica_DQ114183.1_China:Jiangsu,Zhenjiang,YangtzeRiver	DQ114183.1	Sun et al., 2005a
Eriocheir japonica_DQ114184.1_China:Jiangsu,Zhenjiang,YangtzeRiver	DQ114184.1	Sun et al., 2005a
Eriocheir japonica_DQ114185.1_China:Jiangsu,Zhenjiang,YangtzeRiver	DQ114185.1	Sun et al., 2005a
Eriocheir japonica_DQ114186.1_China:Jiangsu,Qidong	DQ114186.1	Sun et al., 2005a
Eriocheir japonica_DQ114187.1_China:Jiangsu,Nanjing,YangtzeRiver	DQ114187.1	Sun et al., 2005a
Eriocheir japonica_DQ114188.1_China:Liaoning,Panjin	DQ114188.1	Sun et al., 2005a
Eriocheir japonica_DQ114189.1_China:Jiangsu,Nanjing,YangtzeRiver	DQ114189.1	Sun et al., 2005a
Eriocheir japonica_DQ114190.1_China:Liaoning,Panjin	DQ114190.1	Sun et al., 2005a
Eriocheir japonica_DQ114191.1_China:Liaoning,Panjin	DQ114191.1	Sun et al., 2005a
Eriocheir japonica_DQ114192.1_China:Liaoning,Panjin	DQ114192.1	Sun et al., 2005a
Eriocheir japonica_DQ114193.1_China:Liaoning,Dandong,Yalu	DQ114193.1	Sun et al., 2005a
Eriocheir japonica_DQ114194.1_China:Liaoning,Dandong,Yalu	DQ114194.1	Sun et al., 2005a
Eriocheir japonica_DQ114195.1_China:Liaoning,Panjin	DQ114195.1	Sun et al., 2005a
Eriocheir japonica_DQ114196.1_China:Zhejiang,Qingtian,OujiangRiver	DQ114196.1	Sun et al., 2005a
Eriocheir japonica_DQ114197.1_China:Guangdong,Zhanjiang,YoungRiver	DQ114197.1	Sun et al., 2005a
Eriocheir japonica_DQ114198.1_China:Zhejiang,Qingtian,OujiangRiver	DQ114198.1	Sun et al., 2005a
Eriocheir japonica_DQ114199.1_China:Zhejiang,Qingtian,OujiangRiver	DQ114199.1	Sun et al., 2005a
Eriocheir japonica_DQ114200.1_China:Anhui,Chuzhou	DQ114200.1	Sun et al., 2005a
Eriocheir japonica_DQ114201.1_China:Anhui,Chuzhou	DQ114201.1	Sun et al., 2005a
Eriocheir japonica_DQ114202.1_China:Guangxi,Hepu	DQ114202.1	Sun et al., 2005a
Eriocheir japonica_DQ114203.1_China:Guangxi,Hepu	DQ114203.1	Sun et al., 2005a
Eriocheir japonica_DQ114204.1_China:Guangxi,Hepu	DQ114204.1	Sun et al., 2005a
Eriocheir japonica_DQ114205.1_China:Fujian,JiulongJiang	DQ114205.1	Sun et al., 2005a
Eriocheir japonica_DQ114206.1_China:Fujian,JiulongJiang	DQ114206.1	Sun et al., 2005a
Eriocheir japonica_DQ114207.1_China:Fujian,Yong¬¥an,Shaxi	DQ114207.1	Sun et al., 2005a
Eriocheir japonica_DQ114208.1_China:Guangdong,Zhanjiang,YoungRiver	DQ114208.1	Sun et al., 2005a
Eriocheir japonica_DQ114209.1_China:Jiangsu,Zhenjiang,YangtzeRiver	DQ114209.1	Sun et al., 2005a
Eriocheir japonica_DQ114210.1_China:Zhejiang,OujiangRiver	DQ114210.1	Sun et al., 2005a
Eriocheir japonica_DQ114211.1_China:Anhui,Tongling,YangtzeRiver	DQ114211.1	Sun et al., 2005a
Eriocheir japonica_DQ114212.1_China:Liaoning,Panjin	DQ114212.1	Sun et al., 2005a
Eriocheir japonica_DQ114213.1_China:Fujian,JiulongJiang	DQ114213.1	Sun et al., 2005a
Eriocheir japonica_DQ114214.1_China:Guangxi,Hepu	DQ114214.1	Sun et al., 2005a
Eriocheir japonica_DQ114215.1_China:Guangxi,Hepu	DQ114215.1	Sun et al., 2005a
Eriocheir japonica_DQ114216.1_China:Guangxi,Hepu	DQ114216.1	Sun et al., 2005a
Eriocheir japonica_DQ114217.1_China:Fujian,Yong¬¥an,Shaxi	DQ114217.1	Sun et al., 2005a
Eriocheir japonica_DQ114218.1_China:Guangdong,Zhanjiang,YoungRiver	DQ114218.1	Sun et al., 2005a
Eriocheir sinensis_DQ779886.1_China:Shanghai,Chongming	DQ779886.1	Wang et al., 2020
Eriocheir sinensis_DQ779887.1_China:Liaoning,Dandong,Yalu	DQ779887.1	Wang et al., 2020
Eriocheir sinensis_DQ779888.1_China:Liaoning,Dandong,Yalu	DQ779888.1	Wang et al., 2020
Eriocheir sinensis_DQ779889.1_China:Liaoning,Dandong,Yalu	DQ779889.1	Wang et al., 2020
Eriocheir sinensis_DQ779890.1_China:Liaoning,Dandong,Yalu	DQ779890.1	Wang et al., 2020
Eriocheir sinensis_DQ779891.1_China:Shanghai,Chongming	DQ779891.1	Wang et al., 2020
Eriocheir sinensis_DQ779892.1_China:Shanghai,Chongming	DQ779892.1	Wang et al., 2020
Eriocheir sinensis_DQ779893.1_China:Liaoning,Dandong,Yalu	DQ779893.1	Wang et al., 2020
Eriocheir sinensis_DQ779894.1_China:Liaoning,Dandong,Yalu	DQ779894.1	Wang et al., 2020
Eriocheir sinensis_DQ779895.1_China:Liaoning,Dandong,Yalu	DQ779895.1	Wang et al., 2020
Eriocheir sinensis_DQ779896.1_China:Shanghai,Chongming	DQ779896.1	Wang et al., 2020
Eriocheir sinensis_DQ779897.1_China:Liaoning,Dandong,Yalu	DQ779897.1	Wang et al., 2020
Eriocheir sinensis_DQ779898.1_China:Liaoning,Dandong,Yalu	DQ779898.1	Wang et al., 2020
Eriocheir sinensis_DQ779899.1_China:Jiangsu,Zhenjiang,YangtzeRiver	DQ779899.1	Wang et al., 2020
Eriocheir sinensis_DQ779900.1_China:Shanghai,Chongming	DQ779900.1	Wang et al., 2020
Eriocheir sinensis_DQ779901.1_China:Anhui,Tongling,YangtzeRiver	DQ779901.1	Wang et al., 2020
Eriocheir sinensis_DQ779902.1_China:Shanghai,Chongming	DQ779902.1	Wang et al., 2020
Eriocheir sinensis_DQ779903.1_China:Shanghai,Chongming	DQ779903.1	Wang et al., 2020
Eriocheir sinensis_DQ779904.1_China:Anhui,Tongling,YangtzeRiver	DQ779904.1	Wang et al., 2020
Eriocheir sinensis_DQ779905.1_China:Liaoning,Dandong,Yalu	DQ779905.1	Wang et al., 2020
Eriocheir sinensis_DQ779906.1_China:Anhui,Tongling,YangtzeRiver	DQ779906.1	Wang et al., 2020
Eriocheir sinensis_DQ779907.1_China:Liaoning,Dandong,Yalu	DQ779907.1	Wang et al., 2020
Eriocheir sinensis_DQ779908.1_China:Anhui,Tongling,YangtzeRiver	DQ779908.1	Wang et al., 2020
Eriocheir sinensis_DQ779909.1_China:Shanghai,Chongming	DQ779909.1	Wang et al., 2020
Eriocheir sinensis_DQ779910.1_China:Shanghai,Chongming	DQ779910.1	Wang et al., 2020
Eriocheir sinensis_DQ779911.1_China:Liaoning,Dandong,Yalu	DQ779911.1	Wang et al., 2020
Eriocheir sinensis_DQ779912.1_China:Liaoning,Dandong,Yalu	DQ779912.1	Wang et al., 2020
Eriocheir sinensis_DQ779913.1_China:Anhui,Chuzhou	DQ779913.1	Wang et al., 2020
Eriocheir hepuensis_DQ779914.1_China:Guangdong,Zhanjiang,YoungRiver	DQ779914.1	Wang et al., 2020
Eriocheir hepuensis_DQ779915.1_China:Guangdong,Zhanjiang,YoungRiver	DQ779915.1	Wang et al., 2020
Eriocheir hepuensis_DQ779916.1_China:Guangdong,Zhanjiang,YoungRiver	DQ779916.1	Wang et al., 2020
Eriocheir hepuensis_DQ779917.1_China:Anhui,Tongling,YangtzeRiver	DQ779917.1	Wang et al., 2020
Eriocheir hepuensis_DQ779918.1_China:Guangdong,Zhanjiang,YoungRiver	DQ779918.1	Wang et al., 2020
Eriocheir japonica_EU315942.1_Japan:Hokkaido,Hakodate,Shiodomarikawa	EU315942.1	Wang et al., 2008
Eriocheir japonica_EU315943.1_Japan:Hokkaido,Hakodate,Shiodomarikawa	EU315943.1	Wang et al., 2008
Eriocheir japonica_EU315944.1_Japan:Hokkaido,Hakodate,Shiodomarikawa	EU315944.1	Wang et al., 2008
Eriocheir japonica_EU315945.1_Japan:Hokkaido,Hakodate,Shiodomarikawa	EU315945.1	Wang et al., 2008
Eriocheir japonica_EU315946.1_Japan:Hokkaido,Hakodate,Shiodomarikawa	EU315946.1	Wang et al., 2008
Eriocheir japonica_EU315947.1_Japan:Hokkaido,Hakodate,Shiodomarikawa	EU315947.1	Wang et al., 2008
Eriocheir japonica_EU315948.1_Japan:Hokkaido,Hakodate,Shiodomarikawa	EU315948.1	Wang et al., 2008
Eriocheir japonica_EU315949.1_Japan:Hokkaido,Hakodate,Shiodomarikawa	EU315949.1	Wang et al., 2008
Eriocheir japonica_EU315950.1_Japan:Hokkaido,Hakodate,Shiodomarikawa	EU315950.1	Wang et al., 2008
Eriocheir japonica_EU315951.1_Japan:Hokkaido,Hakodate,Shiodomarikawa	EU315951.1	Wang et al., 2008
Eriocheir japonica_EU315952.1_Japan:Hokkaido,Hakodate,Shiodomarikawa	EU315952.1	Wang et al., 2008
Eriocheir japonica_EU315953.1_Japan:Hokkaido,Hakodate,Shiodomarikawa	EU315953.1	Wang et al., 2008
Eriocheir japonica_EU315954.1_Japan:Hokkaido,Hakodate,Shiodomarikawa	EU315954.1	Wang et al., 2008
Eriocheir japonica_EU315955.1_Japan:Hokkaido,Hakodate,Shiodomarikawa	EU315955.1	Wang et al., 2008
Eriocheir japonica_EU315956.1_Japan:Hokkaido,Hakodate,Shiodomarikawa	EU315956.1	Wang et al., 2008
Eriocheir sinensis_EU315957.1_China:Liaoning,Panjin,LiaoRiver	EU315957.1	Wang et al., 2008
Eriocheir sinensis_EU315958.1_China:Liaoning,Panjin,LiaoRiver	EU315958.1	Wang et al., 2008
Eriocheir sinensis_EU315959.1_China:Liaoning,Panjin,LiaoRiver	EU315959.1	Wang et al., 2008
Eriocheir sinensis_EU315960.1_China:Liaoning,Panjin,LiaoRiver	EU315960.1	Wang et al., 2008
Eriocheir sinensis_EU315961.1_China:Liaoning,Panjin,LiaoRiver	EU315961.1	Wang et al., 2008
Eriocheir sinensis_EU315962.1_China:Liaoning,Panjin,LiaoRiver	EU315962.1	Wang et al., 2008
Eriocheir sinensis_EU315963.1_China:Liaoning,Panjin,LiaoRiver	EU315963.1	Wang et al., 2008
Eriocheir sinensis_EU315964.1_China:Liaoning,Panjin,LiaoRiver	EU315964.1	Wang et al., 2008
Eriocheir sinensis_EU315965.1_China:Liaoning,Panjin,LiaoRiver	EU315965.1	Wang et al., 2008
Eriocheir sinensis_EU315966.1_China:Liaoning,Panjin,LiaoRiver	EU315966.1	Wang et al., 2008
Eriocheir sinensis_EU315967.1_China:Liaoning,Panjin,LiaoRiver	EU315967.1	Wang et al., 2008
Eriocheir sinensis_EU315968.1_China:Liaoning,Panjin,LiaoRiver	EU315968.1	Wang et al., 2008
Eriocheir sinensis_EU315969.1_China:Liaoning,Panjin,LiaoRiver	EU315969.1	Wang et al., 2008
Eriocheir sinensis_EU315970.1_China:Liaoning,Panjin,LiaoRiver	EU315970.1	Wang et al., 2008
Eriocheir sinensis_EU315971.1_China:Liaoning,Panjin,LiaoRiver	EU315971.1	Wang et al., 2008
Eriocheir sinensis_EU315972.1_China:Liaoning,Panjin,LiaoRiver	EU315972.1	Wang et al., 2008
Eriocheir sinensis_EU315973.1_China:Liaoning,Panjin,LiaoRiver	EU315973.1	Wang et al., 2008
Eriocheir sinensis_EU315974.1_China:Liaoning,Panjin,LiaoRiver	EU315974.1	Wang et al., 2008
Eriocheir sinensis_EU315975.1_China:Liaoning,Panjin,LiaoRiver	EU315975.1	Wang et al., 2008
Eriocheir sinensis_EU315976.1_China:Liaoning,Panjin,LiaoRiver	EU315976.1	Wang et al., 2008
Eriocheir hepuensis_EU315977.1_China:Fujian,Fuzhou,MingjiangRiver	EU315977.1	Wang et al., 2008
Eriocheir sinensis_EU315978.1_China:Fujian,Fuzhou,MingjiangRiver	EU315978.1	Wang et al., 2008
Eriocheir hepuensis_EU315979.1_China:Fujian,Fuzhou,MingjiangRiver	EU315979.1	Wang et al., 2008
Eriocheir hepuensis_EU315980.1_China:Fujian,Fuzhou,MingjiangRiver	EU315980.1	Wang et al., 2008
Eriocheir sinensis_EU315981.1_China:Fujian,Fuzhou,MingjiangRiver	EU315981.1	Wang et al., 2008
Eriocheir sinensis_EU315982.1_China:Fujian,Fuzhou,MingjiangRiver	EU315982.1	Wang et al., 2008
Eriocheir hepuensis_EU315983.1_China:Fujian,Fuzhou,MingjiangRiver	EU315983.1	Wang et al., 2008
Eriocheir sinensis_EU315984.1_China:Fujian,Fuzhou,MingjiangRiver	EU315984.1	Wang et al., 2008
Eriocheir hepuensis_EU315985.1_China:Fujian,Fuzhou,MingjiangRiver	EU315985.1	Wang et al., 2008
Eriocheir hepuensis_EU315986.1_China:Fujian,Fuzhou,MingjiangRiver	EU315986.1	Wang et al., 2008
Eriocheir hepuensis_EU315987.1_China:Fujian,Fuzhou,MingjiangRiver	EU315987.1	Wang et al., 2008
Eriocheir hepuensis_EU315988.1_China:Fujian,Fuzhou,MingjiangRiver	EU315988.1	Wang et al., 2008
Eriocheir hepuensis_EU315989.1_China:Fujian,Fuzhou,MingjiangRiver	EU315989.1	Wang et al., 2008
Eriocheir sinensis_EU315990.1_China:Fujian,Fuzhou,MingjiangRiver	EU315990.1	Wang et al., 2008
Eriocheir hepuensis_EU315991.1_China:Fujian,Fuzhou,MingjiangRiver	EU315991.1	Wang et al., 2008
Eriocheir hepuensis_EU315992.1_China:Fujian,Fuzhou,MingjiangRiver	EU315992.1	Wang et al., 2008
Eriocheir hepuensis_EU315993.1_China:Fujian,Fuzhou,MingjiangRiver	EU315993.1	Wang et al., 2008
Eriocheir sinensis_EU315994.1_China:Fujian,Fuzhou,MingjiangRiver	EU315994.1	Wang et al., 2008
Eriocheir hepuensis_EU315995.1_China:Fujian,Fuzhou,MingjiangRiver	EU315995.1	Wang et al., 2008
Eriocheir sinensis_EU315996.1_China:Fujian,Fuzhou,MingjiangRiver	EU315996.1	Wang et al., 2008
Eriocheir sinensis_EU315997.1_China:Fujian,Fuzhou,MingjiangRiver	EU315997.1	Wang et al., 2008
Eriocheir hepuensis_EU315998.1_China:Guangxi,Hepu,NanliujiangRiver	EU315998.1	Wang et al., 2008
Eriocheir hepuensis_EU315999.1_China:Guangxi,Hepu,NanliujiangRiver	EU315999.1	Wang et al., 2008
Eriocheir hepuensis_EU316000.1_China:Guangxi,Hepu,NanliujiangRiver	EU316000.1	Wang et al., 2008
Eriocheir hepuensis_EU316001.1_China:Guangxi,Hepu,NanliujiangRiver	EU316001.1	Wang et al., 2008
Eriocheir hepuensis_EU316002.1_China:Guangxi,Hepu,NanliujiangRiver	EU316002.1	Wang et al., 2008
Eriocheir hepuensis_EU316003.1_China:Guangxi,Hepu,NanliujiangRiver	EU316003.1	Wang et al., 2008
Eriocheir hepuensis_EU316004.1_China:Guangxi,Hepu,NanliujiangRiver	EU316004.1	Wang et al., 2008
Eriocheir hepuensis_EU316005.1_China:Guangxi,Hepu,NanliujiangRiver	EU316005.1	Wang et al., 2008
Eriocheir hepuensis_EU316006.1_China:Guangxi,Hepu,NanliujiangRiver	EU316006.1	Wang et al., 2008
Eriocheir hepuensis_EU316007.1_China:Guangxi,Hepu,NanliujiangRiver	EU316007.1	Wang et al., 2008
Eriocheir hepuensis_EU316008.1_China:Guangxi,Hepu,NanliujiangRiver	EU316008.1	Wang et al., 2008
Eriocheir hepuensis_EU316009.1_China:Guangxi,Hepu,NanliujiangRiver	EU316009.1	Wang et al., 2008
Eriocheir hepuensis_EU316010.1_China:Guangxi,Hepu,NanliujiangRiver	EU316010.1	Wang et al., 2008
Eriocheir hepuensis_EU316011.1_China:Guangxi,Hepu,NanliujiangRiver	EU316011.1	Wang et al., 2008
Eriocheir hepuensis_EU316012.1_China:Guangxi,Hepu,NanliujiangRiver	EU316012.1	Wang et al., 2008
Eriocheir hepuensis_EU316013.1_China:Guangxi,Hepu,NanliujiangRiver	EU316013.1	Wang et al., 2008
Eriocheir hepuensis_EU316014.1_China:Guangxi,Hepu,NanliujiangRiver	EU316014.1	Wang et al., 2008
Eriocheir hepuensis_EU316015.1_China:Guangxi,Hepu,NanliujiangRiver	EU316015.1	Wang et al., 2008
Eriocheir hepuensis_EU316016.1_China:Guangxi,Hepu,NanliujiangRiver	EU316016.1	Wang et al., 2008
Eriocheir hepuensis_EU316017.1_China:Guangxi,Hepu,NanliujiangRiver	EU316017.1	Wang et al., 2008
Eriocheir sinensis_EU316018.1_China:Zhejiang,Wenzhou,OujiangRiver	EU316018.1	Wang et al., 2008
Eriocheir sinensis_EU316019.1_China:Zhejiang,Wenzhou,OujiangRiver	EU316019.1	Wang et al., 2008
Eriocheir sinensis_EU316020.1_China:Zhejiang,Wenzhou,OujiangRiver	EU316020.1	Wang et al., 2008
Eriocheir sinensis_EU316021.1_China:Zhejiang,Wenzhou,OujiangRiver	EU316021.1	Wang et al., 2008
Eriocheir sinensis_EU316022.1_China:Zhejiang,Wenzhou,OujiangRiver	EU316022.1	Wang et al., 2008
Eriocheir hepuensis_EU316023.1_China:Zhejiang,Wenzhou,OujiangRiver	EU316023.1	Wang et al., 2008
Eriocheir hepuensis_EU316024.1_China:Zhejiang,Wenzhou,OujiangRiver	EU316024.1	Wang et al., 2008
Eriocheir hepuensis_EU316025.1_China:Zhejiang,Wenzhou,OujiangRiver	EU316025.1	Wang et al., 2008
Eriocheir sinensis_EU316026.1_China:Zhejiang,Wenzhou,OujiangRiver	EU316026.1	Wang et al., 2008
Eriocheir sinensis_EU316027.1_China:Zhejiang,Wenzhou,OujiangRiver	EU316027.1	Wang et al., 2008
Eriocheir sinensis_EU316028.1_China:Zhejiang,Wenzhou,OujiangRiver	EU316028.1	Wang et al., 2008
Eriocheir sinensis_EU316029.1_China:Zhejiang,Wenzhou,OujiangRiver	EU316029.1	Wang et al., 2008
Eriocheir sinensis_EU316030.1_China:Zhejiang,Wenzhou,OujiangRiver	EU316030.1	Wang et al., 2008
Eriocheir sinensis_EU316031.1_China:Zhejiang,Wenzhou,OujiangRiver	EU316031.1	Wang et al., 2008
Eriocheir sinensis_EU316032.1_China:Zhejiang,Wenzhou,OujiangRiver	EU316032.1	Wang et al., 2008
Eriocheir hepuensis_EU316033.1_China:Zhejiang,Wenzhou,OujiangRiver	EU316033.1	Wang et al., 2008
Eriocheir hepuensis_EU316034.1_China:Zhejiang,Wenzhou,OujiangRiver	EU316034.1	Wang et al., 2008
Eriocheir hepuensis_EU316035.1_China:Zhejiang,Wenzhou,OujiangRiver	EU316035.1	Wang et al., 2008
Eriocheir hepuensis_EU316036.1_China:Zhejiang,Wenzhou,OujiangRiver	EU316036.1	Wang et al., 2008
Eriocheir hepuensis_EU316037.1_China:Guangdong,Shunde,ZhujiangRiver	EU316037.1	Wang et al., 2008
Eriocheir hepuensis_EU316038.1_China:Guangdong,Shunde,ZhujiangRiver	EU316038.1	Wang et al., 2008
Eriocheir hepuensis_EU316039.1_China:Guangdong,Shunde,ZhujiangRiver	EU316039.1	Wang et al., 2008
Eriocheir hepuensis_EU316040.1_China:Guangdong,Shunde,ZhujiangRiver	EU316040.1	Wang et al., 2008
Eriocheir hepuensis_EU316041.1_China:Guangdong,Shunde,ZhujiangRiver	EU316041.1	Wang et al., 2008
Eriocheir hepuensis_EU316042.1_China:Guangdong,Shunde,ZhujiangRiver	EU316042.1	Wang et al., 2008
Eriocheir hepuensis_EU316043.1_China:Guangdong,Shunde,ZhujiangRiver	EU316043.1	Wang et al., 2008
Eriocheir hepuensis_EU316044.1_China:Guangdong,Shunde,ZhujiangRiver	EU316044.1	Wang et al., 2008
Eriocheir hepuensis_EU316045.1_China:Guangdong,Shunde,ZhujiangRiver	EU316045.1	Wang et al., 2008
Eriocheir hepuensis_EU316046.1_China:Guangdong,Shunde,ZhujiangRiver	EU316046.1	Wang et al., 2008
Eriocheir hepuensis_EU316047.1_China:Guangdong,Shunde,ZhujiangRiver	EU316047.1	Wang et al., 2008
Eriocheir hepuensis_EU316048.1_China:Guangdong,Shunde,ZhujiangRiver	EU316048.1	Wang et al., 2008
Eriocheir hepuensis_EU316049.1_China:Guangdong,Shunde,ZhujiangRiver	EU316049.1	Wang et al., 2008
Eriocheir hepuensis_EU316050.1_China:Guangdong,Shunde,ZhujiangRiver	EU316050.1	Wang et al., 2008
Eriocheir hepuensis_EU316051.1_China:Guangdong,Shunde,ZhujiangRiver	EU316051.1	Wang et al., 2008
Eriocheir hepuensis_EU316052.1_China:Guangdong,Shunde,ZhujiangRiver	EU316052.1	Wang et al., 2008
Eriocheir hepuensis_EU316053.1_China:Guangdong,Shunde,ZhujiangRiver	EU316053.1	Wang et al., 2008
Eriocheir hepuensis_EU316054.1_China:Guangdong,Shunde,ZhujiangRiver	EU316054.1	Wang et al., 2008
Eriocheir hepuensis_EU316055.1_China:Guangdong,Shunde,ZhujiangRiver	EU316055.1	Wang et al., 2008
Eriocheir hepuensis_EU316056.1_China:Guangdong,Shunde,ZhujiangRiver	EU316056.1	Wang et al., 2008
Eriocheir sinensis_EU316057.1_China:Shandong,Dongping,YellowRiver	EU316057.1	Wang et al., 2008
Eriocheir sinensis_EU316058.1_China:Shandong,Dongping,YellowRiver	EU316058.1	Wang et al., 2008
Eriocheir sinensis_EU316059.1_China:Shandong,Dongping,YellowRiver	EU316059.1	Wang et al., 2008
Eriocheir sinensis_EU316060.1_China:Shandong,Dongping,YellowRiver	EU316060.1	Wang et al., 2008
Eriocheir sinensis_EU316061.1_China:Shandong,Dongping,YellowRiver	EU316061.1	Wang et al., 2008
Eriocheir sinensis_EU316062.1_China:Shandong,Dongping,YellowRiver	EU316062.1	Wang et al., 2008
Eriocheir sinensis_EU316063.1_China:Shandong,Dongping,YellowRiver	EU316063.1	Wang et al., 2008
Eriocheir sinensis_EU316064.1_China:Shandong,Dongping,YellowRiver	EU316064.1	Wang et al., 2008
Eriocheir sinensis_EU316065.1_China:Shandong,Dongping,YellowRiver	EU316065.1	Wang et al., 2008
Eriocheir sinensis_EU316066.1_China:Shandong,Dongping,YellowRiver	EU316066.1	Wang et al., 2008
Eriocheir sinensis_EU316067.1_China:Shandong,Dongping,YellowRiver	EU316067.1	Wang et al., 2008
Eriocheir sinensis_EU316068.1_China:Shandong,Dongping,YellowRiver	EU316068.1	Wang et al., 2008
Eriocheir sinensis_EU316069.1_China:Shandong,Dongping,YellowRiver	EU316069.1	Wang et al., 2008
Eriocheir sinensis_EU316070.1_China:Shandong,Dongping,YellowRiver	EU316070.1	Wang et al., 2008
Eriocheir sinensis_EU316071.1_China:Shandong,Dongping,YellowRiver	EU316071.1	Wang et al., 2008
Eriocheir sinensis_EU316072.1_China:Shandong,Dongping,YellowRiver	EU316072.1	Wang et al., 2008
Eriocheir sinensis_EU316073.1_China:Shandong,Dongping,YellowRiver	EU316073.1	Wang et al., 2008
Eriocheir sinensis_EU316074.1_China:Shandong,Dongping,YellowRiver	EU316074.1	Wang et al., 2008
Eriocheir sinensis_EU316075.1_China:Shandong,Dongping,YellowRiver	EU316075.1	Wang et al., 2008
Eriocheir sinensis_EU316076.1_China:Jiangsu,Zhenjiang,YangtzeRiver	EU316076.1	Wang et al., 2008
Eriocheir sinensis_EU316077.1_China:Jiangsu,Zhenjiang,YangtzeRiver	EU316077.1	Wang et al., 2008
Eriocheir sinensis_EU316078.1_China:Jiangsu,Zhenjiang,YangtzeRiver	EU316078.1	Wang et al., 2008
Eriocheir sinensis_EU316079.1_China:Jiangsu,Zhenjiang,YangtzeRiver	EU316079.1	Wang et al., 2008
Eriocheir sinensis_EU316080.1_China:Jiangsu,Zhenjiang,YangtzeRiver	EU316080.1	Wang et al., 2008
Eriocheir sinensis_EU316081.1_China:Jiangsu,Zhenjiang,YangtzeRiver	EU316081.1	Wang et al., 2008
Eriocheir sinensis_EU316082.1_China:Jiangsu,Zhenjiang,YangtzeRiver	EU316082.1	Wang et al., 2008
Eriocheir sinensis_EU316083.1_China:Jiangsu,Zhenjiang,YangtzeRiver	EU316083.1	Wang et al., 2008
Eriocheir sinensis_EU316084.1_China:Jiangsu,Zhenjiang,YangtzeRiver	EU316084.1	Wang et al., 2008
Eriocheir sinensis_EU316085.1_China:Jiangsu,Zhenjiang,YangtzeRiver	EU316085.1	Wang et al., 2008
Eriocheir sinensis_EU316086.1_China:Jiangsu,Zhenjiang,YangtzeRiver	EU316086.1	Wang et al., 2008
Eriocheir sinensis_EU316087.1_China:Jiangsu,Zhenjiang,YangtzeRiver	EU316087.1	Wang et al., 2008
Eriocheir sinensis_EU316088.1_China:Jiangsu,Zhenjiang,YangtzeRiver	EU316088.1	Wang et al., 2008
Eriocheir sinensis_EU316089.1_China:Jiangsu,Zhenjiang,YangtzeRiver	EU316089.1	Wang et al., 2008
Eriocheir sinensis_EU316090.1_China:Jiangsu,Zhenjiang,YangtzeRiver	EU316090.1	Wang et al., 2008
Eriocheir sinensis_EU316091.1_China:Jiangsu,Zhenjiang,YangtzeRiver	EU316091.1	Wang et al., 2008
Eriocheir sinensis_EU316092.1_China:Jiangsu,Zhenjiang,YangtzeRiver	EU316092.1	Wang et al., 2008
Eriocheir sinensis_EU316093.1_China:Jiangsu,Zhenjiang,YangtzeRiver	EU316093.1	Wang et al., 2008
Eriocheir sinensis_EU316094.1_China:Jiangsu,Zhenjiang,YangtzeRiver	EU316094.1	Wang et al., 2008
Eriocheir sinensis_EU316095.1_China:Jiangsu,Zhenjiang,YangtzeRiver	EU316095.1	Wang et al., 2008
Eriocheir sinensis_EU316096.1_China:Jiangsu,Zhenjiang,YangtzeRiver	EU316096.1	Wang et al., 2008
Eriocheir sinensis_EU316097.1_China:Jiangsu,Zhenjiang,YangtzeRiver	EU316097.1	Wang et al., 2008
Eriocheir sinensis_EU316098.1_China:Jiangsu,Zhenjiang,YangtzeRiver	EU316098.1	Wang et al., 2008
Eriocheir sinensis_EU316099.1_China:Jiangsu,Zhenjiang,YangtzeRiver	EU316099.1	Wang et al., 2008
Eriocheir sinensis_EU316100.1_China:Jiangsu,Zhenjiang,YangtzeRiver	EU316100.1	Wang et al., 2008
Eriocheir sinensis_EU316101.1_China:Jiangsu,Zhenjiang,YangtzeRiver	EU316101.1	Wang et al., 2008
Eriocheir sinensis_EU316102.1_China:Jiangsu,Zhenjiang,YangtzeRiver	EU316102.1	Wang et al., 2008
Eriocheir sinensis_EU316103.1_China:Jiangsu,Zhenjiang,YangtzeRiver	EU316103.1	Wang et al., 2008
Eriocheir sinensis_EU316104.1_China:Jiangsu,Zhenjiang,YangtzeRiver	EU316104.1	Wang et al., 2008
Eriocheir sinensis_EU316105.1_China:Jiangsu,Zhenjiang,YangtzeRiver	EU316105.1	Wang et al., 2008
Eriocheir sinensis_EU316106.1_China:Jiangsu,Zhenjiang,YangtzeRiver	EU316106.1	Wang et al., 2008
Eriocheir sinensis_EU316107.1_China:Jiangsu,Zhenjiang,YangtzeRiver	EU316107.1	Wang et al., 2008
Eriocheir sinensis_EU316108.1_China:Jiangsu,Zhenjiang,YangtzeRiver	EU316108.1	Wang et al., 2008
Eriocheir sinensis_EU316109.1_China:Jiangsu,Zhenjiang,YangtzeRiver	EU316109.1	Wang et al., 2008
Eriocheir sinensis_EU316110.1_China:Jiangsu,Zhenjiang,YangtzeRiver	EU316110.1	Wang et al., 2008
Eriocheir sinensis_FJ750281.1_1_SouthKorea:Jeollabuk,Geumgang	FJ750281.1	Xu et al. 2009	only haplotypes are stored on NCBI, but the number of individuals and the corresponding sampling location are given in the publication
Eriocheir sinensis_FJ750281.1_2_SouthKorea:Jeollabuk,Geumgang	FJ750281.1	Xu et al. 2009	only haplotypes are stored on NCBI, but the number of individuals and the corresponding sampling location are given in the publication
Eriocheir sinensis_FJ750282.1_1_China:Zhejiang,Feiyunjiang	FJ750282.1	Xu et al. 2009	only haplotypes are stored on NCBI, but the number of individuals and the corresponding sampling location are given in the publication
Eriocheir sinensis_FJ750283.1_1_China:Zhejiang,Feiyunjiang	FJ750283.1	Xu et al. 2009	only haplotypes are stored on NCBI, but the number of individuals and the corresponding sampling location are given in the publication
Eriocheir sinensis_FJ750284.1_China:Zhejiang,Feiyunjiang	FJ750284.1	Xu et al. 2009	only haplotypes are stored on NCBI, but the number of individuals and the corresponding sampling location are given in the publication
Eriocheir japonica_FJ750285.1_2_Japan:Yamaguchi,Shimonoseki	FJ750285.1	Xu et al. 2009	only haplotypes are stored on NCBI, but the number of individuals and the corresponding sampling location are given in the publication
Eriocheir japonica_FJ750285.1_1_Japan:Yamaguchi,Shimonoseki	FJ750285.1	Xu et al. 2009	only haplotypes are stored on NCBI, but the number of individuals and the corresponding sampling location are given in the publication
Eriocheir japonica_FJ750285.1_Japan:Chiba,Chiba	FJ750285.1	Xu et al. 2009	only haplotypes are stored on NCBI, but the number of individuals and the corresponding sampling location are given in the publication
Eriocheir japonica_FJ750285.1_SoutKorea:Gyeongsangnam-do,Hamyang-gun,Seomjin	FJ750285.1	Xu et al. 2009	only haplotypes are stored on NCBI, but the number of individuals and the corresponding sampling location are given in the publication
Eriocheir japonica_FJ750286.1_Japan:Yamaguchi,Shimonoseki	FJ750286.1	Xu et al. 2009	only haplotypes are stored on NCBI, but the number of individuals and the corresponding sampling location are given in the publication
Eriocheir japonica_FJ750287.1_Japan:Chiba,Chiba	FJ750287.1	Xu et al. 2009	only haplotypes are stored on NCBI, but the number of individuals and the corresponding sampling location are given in the publication
Eriocheir japonica_FJ750288.1_Japan:Chiba,Chiba	FJ750288.1	Xu et al. 2009	only haplotypes are stored on NCBI, but the number of individuals and the corresponding sampling location are given in the publication
Eriocheir japonica_FJ750289.1_SoutKorea:Gyeongsangnam-do,Hamyang-gun,Seomjin	FJ750289.1	Xu et al. 2009	only haplotypes are stored on NCBI, but the number of individuals and the corresponding sampling location are given in the publication
Eriocheir japonica_FJ750290.1_SoutKorea:Gyeongsangnam-do,Hamyang-gun,Seomjin	FJ750290.1	Xu et al. 2009	only haplotypes are stored on NCBI, but the number of individuals and the corresponding sampling location are given in the publication
Eriocheir japonica_FJ750291.1_China:Zhejiang,Feiyunjiang	FJ750291.1	Xu et al. 2009	only haplotypes are stored on NCBI, but the number of individuals and the corresponding sampling location are given in the publication
Eriocheir japonica_FJ750292.1_China:Fujian,Tongan	FJ750292.1	Xu et al. 2009	only haplotypes are stored on NCBI, but the number of individuals and the corresponding sampling location are given in the publication
Eriocheir japonica_FJ750293.1_China:Fujian,Tongan	FJ750293.1	Xu et al. 2009	only haplotypes are stored on NCBI, but the number of individuals and the corresponding sampling location are given in the publication
Eriocheir japonica_FJ750294.1_China:Guangdong,Aotou	FJ750294.1	Xu et al. 2009	only haplotypes are stored on NCBI, but the number of individuals and the corresponding sampling location are given in the publication
Eriocheir japonica_FJ750295.1_China:Guangdong,Aotou	FJ750295.1	Xu et al. 2009	only haplotypes are stored on NCBI, but the number of individuals and the corresponding sampling location are given in the publication
Eriocheir japonica_FJ750296.1_China:Guangdong,ZhujiangRiver	FJ750296.1	Xu et al. 2009	only haplotypes are stored on NCBI, but the number of individuals and the corresponding sampling location are given in the publication
Eriocheir japonica_FJ750297.1_China:Guangdong,ZhujiangRiver	FJ750297.1	Xu et al. 2009	only haplotypes are stored on NCBI, but the number of individuals and the corresponding sampling location are given in the publication
Eriocheir japonica_FJ750298.1_China:Guangxi,Hepu	FJ750298.1	Xu et al. 2009	only haplotypes are stored on NCBI, but the number of individuals and the corresponding sampling location are given in the publication
Eriocheir japonica_FJ750299.1_China:Guangxi,Hepu	FJ750299.1	Xu et al. 2009	only haplotypes are stored on NCBI, but the number of individuals and the corresponding sampling location are given in the publication
Eriocheir japonica_FJ750300.1_China:Guangxi,Hepu	FJ750300.1	Xu et al. 2009	only haplotypes are stored on NCBI, but the number of individuals and the corresponding sampling location are given in the publication
Eriocheir japonica_FJ750301.1_Japan:Okinawa	FJ750301.1	Xu et al. 2009	only haplotypes are stored on NCBI, but the number of individuals and the corresponding sampling location are given in the publication
Eriocheir japonica_FJ750302.1_Japan:Okinawa	FJ750302.1	Xu et al. 2009	only haplotypes are stored on NCBI, but the number of individuals and the corresponding sampling location are given in the publication
Eriocheir_sinensis_FJ750306_1_China:Liaoning,LiaoRiver	FJ750306	Xu et al. 2009	only haplotypes are stored on NCBI, but the number of individuals and the corresponding sampling location are given in the publication
Eriocheir_sinensis_FJ750306_3_China:Liaoning,LiaoRiver	FJ750306	Xu et al. 2009	only haplotypes are stored on NCBI, but the number of individuals and the corresponding sampling location are given in the publication
Eriocheir_sinensis_FJ750306_2_China:Liaoning,LiaoRiver	FJ750306	Xu et al. 2009	only haplotypes are stored on NCBI, but the number of individuals and the corresponding sampling location are given in the publication
Eriocheir_sinensis_FJ750306_4_China:Liaoning,LiaoRiver	FJ750306	Xu et al. 2009	only haplotypes are stored on NCBI, but the number of individuals and the corresponding sampling location are given in the publication
Eriocheir_sinensis_FJ750307_China:Liaoning,LiaoRiver	FJ750307	Xu et al. 2009	only haplotypes are stored on NCBI, but the number of individuals and the corresponding sampling location are given in the publication
Eriocheir_sinensis_FJ750308_China:Liaoning,LiaoRiver	FJ750308	Xu et al. 2009	only haplotypes are stored on NCBI, but the number of individuals and the corresponding sampling location are given in the publication
Eriocheir sinensis_FJ750309_China:Liaoning,LiaoRiver	FJ750309	Xu et al. 2009	only haplotypes are stored on NCBI, but the number of individuals and the corresponding sampling location are given in the publication
Eriocheir_sinensis_FJ750310_3_SouthKorea:Jeollabuk,Geumgang	FJ750310	Xu et al. 2009	only haplotypes are stored on NCBI, but the number of individuals and the corresponding sampling location are given in the publication
Eriocheir_sinensis_FJ750310_1_SouthKorea:Jeollabuk,Geumgang	FJ750310	Xu et al. 2009	only haplotypes are stored on NCBI, but the number of individuals and the corresponding sampling location are given in the publication
Eriocheir_sinensis_FJ750310_2_SouthKorea:Jeollabuk,Geumgang	FJ750310	Xu et al. 2009	only haplotypes are stored on NCBI, but the number of individuals and the corresponding sampling location are given in the publication
Eriocheir_sinensis_FJ750311_SouthKorea:Jeollabuk,Geumgang	FJ750311	Xu et al. 2009	only haplotypes are stored on NCBI, but the number of individuals and the corresponding sampling location are given in the publication
Eriocheir_japonica_FJ750312_Japan:Yamaguchi,Shimonoseki	FJ750312	Xu et al. 2009	only haplotypes are stored on NCBI, but the number of individuals and the corresponding sampling location are given in the publication
Eriocheir_japonica_FJ750312_6_Japan:Chiba,Chiba	FJ750312	Xu et al. 2009	only haplotypes are stored on NCBI, but the number of individuals and the corresponding sampling location are given in the publication
Eriocheir_japonica_FJ750312_5_Japan:Chiba,Chiba	FJ750312	Xu et al. 2009	only haplotypes are stored on NCBI, but the number of individuals and the corresponding sampling location are given in the publication
Eriocheir_japonica_FJ750312_2_Japan:Chiba,Chiba	FJ750312	Xu et al. 2009	only haplotypes are stored on NCBI, but the number of individuals and the corresponding sampling location are given in the publication
Eriocheir_japonica_FJ750312_3_Japan:Chiba,Chiba	FJ750312	Xu et al. 2009	only haplotypes are stored on NCBI, but the number of individuals and the corresponding sampling location are given in the publication
Eriocheir_japonica_FJ750312_4_Japan:Chiba,Chiba	FJ750312	Xu et al. 2009	only haplotypes are stored on NCBI, but the number of individuals and the corresponding sampling location are given in the publication
Eriocheir_japonica_FJ750312_1_Japan:Chiba,Chiba	FJ750312	Xu et al. 2009	only haplotypes are stored on NCBI, but the number of individuals and the corresponding sampling location are given in the publication
Eriocheir_japonica_FJ750313_2_Japan:Yamaguchi,Shimonoseki	FJ750313	Xu et al. 2009	only haplotypes are stored on NCBI, but the number of individuals and the corresponding sampling location are given in the publication
Eriocheir_japonica_FJ750313_1_Japan:Yamaguchi,Shimonoseki	FJ750313	Xu et al. 2009	only haplotypes are stored on NCBI, but the number of individuals and the corresponding sampling location are given in the publication
Eriocheir_japonica_FJ750314_Japan:Yamaguchi,Shimonoseki	FJ750314	Xu et al. 2009	only haplotypes are stored on NCBI, but the number of individuals and the corresponding sampling location are given in the publication
Eriocheir_japonica_FJ750315_Japan:Yamaguchi,Shimonoseki	FJ750315	Xu et al. 2009	only haplotypes are stored on NCBI, but the number of individuals and the corresponding sampling location are given in the publication
Eriocheir_japonica_FJ750316_Japan:Yamaguchi,Shimonoseki	FJ750316	Xu et al. 2009	only haplotypes are stored on NCBI, but the number of individuals and the corresponding sampling location are given in the publication
Eriocheir_japonica_FJ750317_Japan:Chiba,Chiba	FJ750317	Xu et al. 2009	only haplotypes are stored on NCBI, but the number of individuals and the corresponding sampling location are given in the publication
Eriocheir_japonica_FJ750318_SouthKorea:Gyeongsangnam-do,Hamyang-gun,Seomjin	FJ750318	Xu et al. 2009	only haplotypes are stored on NCBI, but the number of individuals and the corresponding sampling location are given in the publication
Eriocheir_japonica_FJ750319_SouthKorea:Gyeongsangnam-do,Hamyang-gun,Seomjin	FJ750319	Xu et al. 2009	only haplotypes are stored on NCBI, but the number of individuals and the corresponding sampling location are given in the publication
Eriocheir_sinensis_KM516908_China:Jiangsu,Yancheng	KM516908	Liu et al., 2015
Eriocheir_sinensis_KP064329_China:Liaoning,Dalian	KP064329	Li et al., 2016a
Eriocheir_sinensis_KP126617_China:Liaoning,Dalian	KP126617	Li et al., 2016b
Eriocheir japonica_LC698327.1_Japan:Aomori,Kamikita,LakeOgawara	LC698327.1	Ichikawa et al., 2023
Eriocheir japonica_LC698328.1_Japan:Aomori,Kamikita,LakeOgawara	LC698328.1	Ichikawa et al., 2023
Eriocheir japonica_LC698329.1_Japan:Aomori,Kamikita,LakeOgawara	LC698329.1	Ichikawa et al., 2023
Eriocheir japonica_LC698330.1_Japan:Aomori,Kamikita,LakeOgawara	LC698330.1	Ichikawa et al., 2023
Eriocheir japonica_LC698331.1_Japan:Aomori,Kamikita,LakeOgawara	LC698331.1	Ichikawa et al., 2023
Eriocheir japonica_LC698332.1_Japan:Aomori,Kamikita,LakeOgawara	LC698332.1	Ichikawa et al., 2023
Eriocheir japonica_LC698333.1_Japan:Aomori,Kamikita,LakeOgawara	LC698333.1	Ichikawa et al., 2023
Eriocheir japonica_LC698334.1_Japan:Aomori,Kamikita,LakeOgawara	LC698334.1	Ichikawa et al., 2023
Eriocheir japonica_LC698335.1_Japan:Aomori,Kamikita,LakeOgawara	LC698335.1	Ichikawa et al., 2023
Eriocheir japonica_LC698336.1_Japan:Aomori,Kamikita,LakeOgawara	LC698336.1	Ichikawa et al., 2023
Eriocheir japonica_LC698337.1_Japan:Aomori,Kamikita,LakeOgawara	LC698337.1	Ichikawa et al., 2023
Eriocheir japonica_LC698338.1_Japan:Aomori,Kamikita,LakeOgawara	LC698338.1	Ichikawa et al., 2023
Eriocheir japonica_LC698339.1_Japan:Aomori,Kamikita,LakeOgawara	LC698339.1	Ichikawa et al., 2023
Eriocheir japonica_LC698340.1_Japan:Aomori,Kamikita,LakeOgawara	LC698340.1	Ichikawa et al., 2023
Eriocheir japonica_LC698341.1_Japan:Aomori,Kamikita,LakeOgawara	LC698341.1	Ichikawa et al., 2023
Eriocheir japonica_LC698342.1_Japan:Aomori,Kamikita,LakeOgawara	LC698342.1	Ichikawa et al., 2023
Eriocheir japonica_LC698343.1_Japan:Aomori,Kamikita,LakeOgawara	LC698343.1	Ichikawa et al., 2023
Eriocheir japonica_LC698344.1_Japan:Aomori,Kamikita,LakeOgawara	LC698344.1	Ichikawa et al., 2023
Eriocheir japonica_LC698345.1_Japan:Aomori,Kamikita,LakeOgawara	LC698345.1	Ichikawa et al., 2023
Eriocheir japonica_LC698346.1_Japan:Aomori,Kamikita,LakeOgawara	LC698346.1	Ichikawa et al., 2023
Eriocheir japonica_LC698347.1_Japan:Aomori,Kamikita,LakeOgawara	LC698347.1	Ichikawa et al., 2023
Eriocheir japonica_LC698348.1_Japan:Aomori,Kamikita,LakeOgawara	LC698348.1	Ichikawa et al., 2023
Eriocheir japonica_LC698349.1_Japan:Aomori,Kamikita,LakeOgawara	LC698349.1	Ichikawa et al., 2023
Eriocheir japonica_LC698350.1_Japan:Aomori,Kamikita,LakeOgawara	LC698350.1	Ichikawa et al., 2023
Eriocheir japonica_LC698351.1_Japan:Aomori,Kamikita,LakeOgawara	LC698351.1	Ichikawa et al., 2023
Eriocheir japonica_LC698352.1_Japan:Hokkaido,Hakodate	LC698352.1	Ichikawa et al., 2023
Eriocheir japonica_LC698353.1_Japan:Hokkaido,Hakodate	LC698353.1	Ichikawa et al., 2023
Eriocheir japonica_LC698354.1_Japan:Hokkaido,Hakodate	LC698354.1	Ichikawa et al., 2023
Eriocheir japonica_LC698355.1_Japan:Hokkaido,Hakodate	LC698355.1	Ichikawa et al., 2023
Eriocheir japonica_LC698356.1_Japan:Hokkaido,Hakodate	LC698356.1	Ichikawa et al., 2023
Eriocheir japonica_LC698357.1_Japan:Hokkaido,Assabu	LC698357.1	Ichikawa et al., 2023
Eriocheir japonica_LC698358.1_Japan:Hokkaido,Assabu	LC698358.1	Ichikawa et al., 2023
Eriocheir japonica_LC698359.1_Japan:Hokkaido,Assabu	LC698359.1	Ichikawa et al., 2023
Eriocheir japonica_LC698360.1_Japan:Hokkaido,Assabu	LC698360.1	Ichikawa et al., 2023
Eriocheir japonica_LC698361.1_Japan:Hokkaido,Assabu	LC698361.1	Ichikawa et al., 2023
Eriocheir japonica_LC698362.1_Japan:Hokkaido,Assabu	LC698362.1	Ichikawa et al., 2023
Eriocheir japonica_LC698363.1_Japan:Hokkaido,Assabu	LC698363.1	Ichikawa et al., 2023
Eriocheir japonica_LC698364.1_Japan:Hokkaido,Assabu	LC698364.1	Ichikawa et al., 2023
Eriocheir japonica_LC698365.1_Japan:Hokkaido,Assabu	LC698365.1	Ichikawa et al., 2023
Eriocheir japonica_LC698366.1_Japan:Hokkaido,Assabu	LC698366.1	Ichikawa et al., 2023
Eriocheir japonica_LC698367.1_Japan:Hokkaido,Assabu	LC698367.1	Ichikawa et al., 2023
Eriocheir japonica_LC698368.1_Japan:Hokkaido,Assabu	LC698368.1	Ichikawa et al., 2023
Eriocheir japonica_LC698369.1_Japan:Hokkaido,Assabu	LC698369.1	Ichikawa et al., 2023
Eriocheir japonica_LC698370.1_Japan:Hokkaido,AbashiriRiver	LC698370.1	Ichikawa et al., 2023
Eriocheir japonica_LC698371.1_Japan:Hokkaido,AbashiriRiver	LC698371.1	Ichikawa et al., 2023
Eriocheir japonica_LC698372.1_Japan:Hokkaido,AbashiriRiver	LC698372.1	Ichikawa et al., 2023
Eriocheir japonica_LC698373.1_Japan:Hokkaido,AbashiriRiver	LC698373.1	Ichikawa et al., 2023
Eriocheir japonica_LC698374.1_Japan:Hokkaido,AbashiriRiver	LC698374.1	Ichikawa et al., 2023
Eriocheir japonica_LC698375.1_Japan:Hokkaido,AbashiriRiver	LC698375.1	Ichikawa et al., 2023
Eriocheir japonica_LC698376.1_Japan:Hokkaido,AbashiriRiver	LC698376.1	Ichikawa et al., 2023
Eriocheir japonica_LC698377.1_Japan:Hokkaido,AbashiriRiver	LC698377.1	Ichikawa et al., 2023
Eriocheir japonica_LC698378.1_Japan:Hokkaido,AbashiriRiver	LC698378.1	Ichikawa et al., 2023
Eriocheir japonica_LC698379.1_Japan:Hokkaido,AbashiriRiver	LC698379.1	Ichikawa et al., 2023
Eriocheir japonica_LC698380.1_Japan:Fukushima,FujiwaraRiver	LC698380.1	Ichikawa et al., 2023
Eriocheir japonica_LC698381.1_Japan:Fukushima,FujiwaraRiver	LC698381.1	Ichikawa et al., 2023
Eriocheir japonica_LC698382.1_Japan:Fukushima,FujiwaraRiver	LC698382.1	Ichikawa et al., 2023
Eriocheir japonica_LC698383.1_Japan:Fukushima,FujiwaraRiver	LC698383.1	Ichikawa et al., 2023
Eriocheir japonica_LC698384.1_Japan:Fukushima,FujiwaraRiver	LC698384.1	Ichikawa et al., 2023
Eriocheir japonica_LC698385.1_Japan:Fukushima,FujiwaraRiver	LC698385.1	Ichikawa et al., 2023
Eriocheir japonica_LC698386.1_Japan:Fukushima,FujiwaraRiver	LC698386.1	Ichikawa et al., 2023
Eriocheir japonica_LC698387.1_Japan:Fukushima,FujiwaraRiver	LC698387.1	Ichikawa et al., 2023
Eriocheir japonica_LC698388.1_Japan:Fukushima,FujiwaraRiver	LC698388.1	Ichikawa et al., 2023
Eriocheir japonica_LC698389.1_Japan:Fukushima,FujiwaraRiver	LC698389.1	Ichikawa et al., 2023
Eriocheir japonica_LC698390.1_Japan:Fukushima,FujiwaraRiver	LC698390.1	Ichikawa et al., 2023
Eriocheir japonica_LC698391.1_Japan:Fukushima,SameRiver	LC698391.1	Ichikawa et al., 2023
Eriocheir japonica_LC698392.1_Japan:Fukushima,SameRiver	LC698392.1	Ichikawa et al., 2023
Eriocheir japonica_LC698393.1_Japan:Fukushima,SameRiver	LC698393.1	Ichikawa et al., 2023
Eriocheir japonica_LC698394.1_Japan:Fukushima,SameRiver	LC698394.1	Ichikawa et al., 2023
Eriocheir japonica_LC698395.1_Japan:Fukushima,SameRiver	LC698395.1	Ichikawa et al., 2023
Eriocheir japonica_LC698396.1_Japan:Fukushima,SameRiver	LC698396.1	Ichikawa et al., 2023
Eriocheir japonica_LC698397.1_Japan:Fukushima,SameRiver	LC698397.1	Ichikawa et al., 2023
Eriocheir japonica_LC698398.1_Japan:Fukushima,SameRiver	LC698398.1	Ichikawa et al., 2023
Eriocheir japonica_LC698399.1_Japan:Fukushima,SameRiver	LC698399.1	Ichikawa et al., 2023
Eriocheir japonica_LC698400.1_Japan:Fukushima,SameRiver	LC698400.1	Ichikawa et al., 2023
Eriocheir japonica_LC698401.1_Japan:Fukushima,SameRiver	LC698401.1	Ichikawa et al., 2023
Eriocheir japonica_LC698402.1_Japan:Fukushima,SameRiver	LC698402.1	Ichikawa et al., 2023
Eriocheir japonica_LC698403.1_Japan:Fukushima,SameRiver	LC698403.1	Ichikawa et al., 2023
Eriocheir japonica_LC698404.1_Japan:Fukushima,SameRiver	LC698404.1	Ichikawa et al., 2023
Eriocheir japonica_LC698405.1_Japan:Fukushima,SameRiver	LC698405.1	Ichikawa et al., 2023
Eriocheir japonica_LC698406.1_Japan:Kanagawa,KanameRiver	LC698406.1	Ichikawa et al., 2023
Eriocheir japonica_LC698407.1_Japan:Kanagawa,KanameRiver	LC698407.1	Ichikawa et al., 2023
Eriocheir japonica_LC698408.1_Japan:Kanagawa,KanameRiver	LC698408.1	Ichikawa et al., 2023
Eriocheir japonica_LC698409.1_Japan:Kanagawa,KanameRiver	LC698409.1	Ichikawa et al., 2023
Eriocheir japonica_LC698410.1_Japan:Kanagawa,KanameRiver	LC698410.1	Ichikawa et al., 2023
Eriocheir japonica_LC698411.1_Japan:Kanagawa,KanameRiver	LC698411.1	Ichikawa et al., 2023
Eriocheir japonica_LC698412.1_Japan:Kanagawa,KanameRiver	LC698412.1	Ichikawa et al., 2023
Eriocheir japonica_LC698413.1_Japan:Kanagawa,KanameRiver	LC698413.1	Ichikawa et al., 2023
Eriocheir japonica_LC698414.1_Japan:Kanagawa,MaedaRiver	LC698414.1	Ichikawa et al., 2023
Eriocheir japonica_LC698415.1_Japan:Kanagawa,MaedaRiver	LC698415.1	Ichikawa et al., 2023
Eriocheir japonica_LC698416.1_Japan:Kanagawa,MaedaRiver	LC698416.1	Ichikawa et al., 2023
Eriocheir japonica_LC698417.1_Japan:Kanagawa,MaedaRiver	LC698417.1	Ichikawa et al., 2023
Eriocheir japonica_LC698418.1_Japan:Kanagawa,MaedaRiver	LC698418.1	Ichikawa et al., 2023
Eriocheir japonica_LC698419.1_Japan:Kanagawa,MaedaRiver	LC698419.1	Ichikawa et al., 2023
Eriocheir japonica_LC698420.1_Japan:Kanagawa,MaedaRiver	LC698420.1	Ichikawa et al., 2023
Eriocheir japonica_LC698421.1_Japan:Kanagawa,MaedaRiver	LC698421.1	Ichikawa et al., 2023
Eriocheir japonica_LC698422.1_Japan:Kanagawa,MaedaRiver	LC698422.1	Ichikawa et al., 2023
Eriocheir japonica_LC698423.1_Japan:Hokkaido,Shibetsu	LC698423.1	Ichikawa et al., 2023
Eriocheir japonica_LC698424.1_Japan:Hokkaido,Shibetsu	LC698424.1	Ichikawa et al., 2023
Eriocheir japonica_LC698425.1_Japan:Hokkaido,Shibetsu	LC698425.1	Ichikawa et al., 2023
Eriocheir japonica_LC698426.1_Japan:Hokkaido,Shibetsu	LC698426.1	Ichikawa et al., 2023
Eriocheir japonica_LC698427.1_Japan:Hokkaido,Shibetsu	LC698427.1	Ichikawa et al., 2023
Eriocheir japonica_LC698428.1_Japan:Hokkaido,Shibetsu	LC698428.1	Ichikawa et al., 2023
Eriocheir japonica_LC698429.1_Japan:Hokkaido,Shibetsu	LC698429.1	Ichikawa et al., 2023
Eriocheir japonica_LC698430.1_Japan:Hokkaido,Shibetsu	LC698430.1	Ichikawa et al., 2023
Eriocheir japonica_LC698431.1_Japan:Hokkaido,NotsukeBay	LC698431.1	Ichikawa et al., 2023
Eriocheir japonica_LC698432.1_Japan:Hokkaido,NotsukeBay	LC698432.1	Ichikawa et al., 2023
Eriocheir japonica_LC698433.1_Japan:Hokkaido,NotsukeBay	LC698433.1	Ichikawa et al., 2023
Eriocheir japonica_LC698434.1_Japan:Hokkaido,NotsukeBay	LC698434.1	Ichikawa et al., 2023
Eriocheir japonica_LC698435.1_Japan:Hokkaido,NotsukeBay	LC698435.1	Ichikawa et al., 2023
Eriocheir japonica_LC698436.1_Japan:Hokkaido,NotsukeBay	LC698436.1	Ichikawa et al., 2023
Eriocheir japonica_LC698437.1_Japan:Hokkaido,NotsukeBay	LC698437.1	Ichikawa et al., 2023
Eriocheir japonica_LC698438.1_Japan:Hokkaido,NotsukeBay	LC698438.1	Ichikawa et al., 2023
Eriocheir japonica_LC698439.1_Japan:Hokkaido,NotsukeBay	LC698439.1	Ichikawa et al., 2023
Eriocheir japonica_LC698440.1_Japan:Hokkaido,NotsukeBay	LC698440.1	Ichikawa et al., 2023
Eriocheir japonica_LC698441.1_Japan:Hokkaido,NotsukeBay	LC698441.1	Ichikawa et al., 2023
Eriocheir japonica_LC698442.1_Japan:Hokkaido,NotsukeBay	LC698442.1	Ichikawa et al., 2023
Eriocheir japonica_LC698443.1_Japan:Hokkaido,NotsukeBay	LC698443.1	Ichikawa et al., 2023
Eriocheir japonica_LC698444.1_Japan:Hokkaido,NotsukeBay	LC698444.1	Ichikawa et al., 2023
Eriocheir japonica_LC698445.1_Japan:Hokkaido,NotsukeBay	LC698445.1	Ichikawa et al., 2023
Eriocheir japonica_LC698446.1_Japan:Hokkaido,NotsukeBay	LC698446.1	Ichikawa et al., 2023
Eriocheir japonica_LC698447.1_Japan:Hokkaido,NotsukeBay	LC698447.1	Ichikawa et al., 2023
Eriocheir japonica_LC698448.1_Japan:Hokkaido,NotsukeBay	LC698448.1	Ichikawa et al., 2023
Eriocheir japonica_LC698449.1_Japan:Hokkaido,NotsukeBay	LC698449.1	Ichikawa et al., 2023
Eriocheir japonica_LC698450.1_Japan:Hokkaido,NotsukeBay	LC698450.1	Ichikawa et al., 2023
Eriocheir japonica_LC698451.1_Japan:Hokkaido,NotsukeBay	LC698451.1	Ichikawa et al., 2023
Eriocheir japonica_LC698452.1_Japan:Hokkaido,NotsukeBay	LC698452.1	Ichikawa et al., 2023
Eriocheir japonica_LC698453.1_Japan:Hokkaido,IshikariRiver	LC698453.1	Ichikawa et al., 2023
Eriocheir japonica_LC698454.1_Japan:Hokkaido,IshikariRiver	LC698454.1	Ichikawa et al., 2023
Eriocheir japonica_LC698455.1_Japan:Hokkaido,IshikariRiver	LC698455.1	Ichikawa et al., 2023
Eriocheir japonica_LC698456.1_Japan:Hokkaido,IshikariRiver	LC698456.1	Ichikawa et al., 2023
Eriocheir japonica_LC698457.1_Japan:Hokkaido,IshikariRiver	LC698457.1	Ichikawa et al., 2023
Eriocheir japonica_LC698458.1_Japan:Hokkaido,IshikariRiver	LC698458.1	Ichikawa et al., 2023
Eriocheir japonica_LC698459.1_Japan:Hokkaido,IshikariRiver	LC698459.1	Ichikawa et al., 2023
Eriocheir japonica_LC698460.1_Japan:Hokkaido,IshikariRiver	LC698460.1	Ichikawa et al., 2023
Eriocheir japonica_LC698461.1_Japan:Hokkaido,IshikariRiver	LC698461.1	Ichikawa et al., 2023
Eriocheir japonica_LC698462.1_Japan:Hokkaido,IshikariRiver	LC698462.1	Ichikawa et al., 2023
Eriocheir japonica_LC698463.1_Japan:Hokkaido,IshikariRiver	LC698463.1	Ichikawa et al., 2023
Eriocheir japonica_LC698464.1_Japan:Hokkaido,IshikariRiver	LC698464.1	Ichikawa et al., 2023
Eriocheir japonica_LC698465.1_Japan:Hokkaido,IshikariRiver	LC698465.1	Ichikawa et al., 2023
Eriocheir japonica_LC698466.1_Japan:Hokkaido,IshikariRiver	LC698466.1	Ichikawa et al., 2023
Eriocheir japonica_LC698467.1_Japan:Hokkaido,IshikariRiver	LC698467.1	Ichikawa et al., 2023
Eriocheir japonica_LC698468.1_Japan:Hokkaido,IshikariRiver	LC698468.1	Ichikawa et al., 2023
Eriocheir japonica_LC698469.1_Japan:Hokkaido,IshikariRiver	LC698469.1	Ichikawa et al., 2023
Eriocheir japonica_LC698470.1_Japan:Hokkaido,IshikariRiver	LC698470.1	Ichikawa et al., 2023
Eriocheir japonica_LC698471.1_Japan:Hokkaido,IshikariRiver	LC698471.1	Ichikawa et al., 2023
Eriocheir japonica_LC698472.1_Japan:Hokkaido,IshikariRiver	LC698472.1	Ichikawa et al., 2023
Eriocheir japonica_LC698473.1_Japan:Hokkaido,IshikariRiver	LC698473.1	Ichikawa et al., 2023
Eriocheir japonica_LC698474.1_Japan:Hokkaido,IshikariRiver	LC698474.1	Ichikawa et al., 2023
Eriocheir japonica_LC698475.1_Japan:Hokkaido,IshikariRiver	LC698475.1	Ichikawa et al., 2023
Eriocheir japonica_LC698476.1_Japan:Hokkaido,IshikariRiver	LC698476.1	Ichikawa et al., 2023
Eriocheir japonica_LC698477.1_Japan:Hokkaido,IshikariRiver	LC698477.1	Ichikawa et al., 2023
Eriocheir japonica_LC698478.1_Japan:Hokkaido,IshikariRiver	LC698478.1	Ichikawa et al., 2023
Eriocheir japonica_LC698479.1_Japan:Yamagata,GekkouRiver	LC698479.1	Ichikawa et al., 2023
Eriocheir japonica_LC698480.1_Japan:Yamagata,GekkouRiver	LC698480.1	Ichikawa et al., 2023
Eriocheir japonica_LC698481.1_Japan:Yamagata,GekkouRiver	LC698481.1	Ichikawa et al., 2023
Eriocheir japonica_LC698482.1_Japan:Yamagata,GekkouRiver	LC698482.1	Ichikawa et al., 2023
Eriocheir japonica_LC698483.1_Japan:Yamagata,GekkouRiver	LC698483.1	Ichikawa et al., 2023
Eriocheir japonica_LC698484.1_Japan:Yamagata,GekkouRiver	LC698484.1	Ichikawa et al., 2023
Eriocheir japonica_LC698485.1_Japan:Yamagata,GekkouRiver	LC698485.1	Ichikawa et al., 2023
Eriocheir japonica_LC698486.1_Japan:Yamagata,GekkouRiver	LC698486.1	Ichikawa et al., 2023
Eriocheir japonica_LC698487.1_Japan:Yamagata,GekkouRiver	LC698487.1	Ichikawa et al., 2023
Eriocheir japonica_LC698488.1_Japan:Yamagata,GekkouRiver	LC698488.1	Ichikawa et al., 2023
Eriocheir japonica_LC698489.1_Japan:Yamagata,GekkouRiver	LC698489.1	Ichikawa et al., 2023
Eriocheir japonica_LC698490.1_Japan:Yamagata,GekkouRiver	LC698490.1	Ichikawa et al., 2023
Eriocheir japonica_LC698491.1_Japan:Yamagata,GekkouRiver	LC698491.1	Ichikawa et al., 2023
Eriocheir japonica_LC698492.1_Japan:Yamagata,GekkouRiver	LC698492.1	Ichikawa et al., 2023
Eriocheir japonica_LC698493.1_Japan:Yamagata,GekkouRiver	LC698493.1	Ichikawa et al., 2023
Eriocheir japonica_LC698494.1_Japan:Yamagata,GekkouRiver	LC698494.1	Ichikawa et al., 2023
Eriocheir japonica_LC698495.1_Japan:Yamagata,GekkouRiver	LC698495.1	Ichikawa et al., 2023
Eriocheir japonica_LC698496.1_Japan:Yamagata,GekkouRiver	LC698496.1	Ichikawa et al., 2023
Eriocheir japonica_LC698497.1_Japan:Yamagata,GekkouRiver	LC698497.1	Ichikawa et al., 2023
Eriocheir japonica_LC698498.1_Japan:Yamagata,GekkouRiver	LC698498.1	Ichikawa et al., 2023
Eriocheir japonica_LC698499.1_Japan:Yamagata,GekkouRiver	LC698499.1	Ichikawa et al., 2023
Eriocheir japonica_LC698500.1_Japan:Yamagata,GekkouRiver	LC698500.1	Ichikawa et al., 2023
Eriocheir japonica_LC698501.1_Japan:Yamagata,GekkouRiver	LC698501.1	Ichikawa et al., 2023
Eriocheir japonica_LC698502.1_Japan:Yamagata,GekkouRiver	LC698502.1	Ichikawa et al., 2023
Eriocheir japonica_LC698503.1_Japan:Yamagata,GekkouRiver	LC698503.1	Ichikawa et al., 2023
Eriocheir japonica_LC698504.1_Japan:Yamagata,GekkouRiver	LC698504.1	Ichikawa et al., 2023
Eriocheir japonica_LC698505.1_Japan:Yamagata,GekkouRiver	LC698505.1	Ichikawa et al., 2023
Eriocheir japonica_LC698506.1_Japan:Yamagata,GekkouRiver	LC698506.1	Ichikawa et al., 2023
Eriocheir japonica_LC698507.1_Japan:Yamagata,GekkouRiver	LC698507.1	Ichikawa et al., 2023
Eriocheir japonica_LC698508.1_Japan:Yamagata,GekkouRiver	LC698508.1	Ichikawa et al., 2023
Eriocheir japonica_LC698509.1_Japan:Hokkaido,LakeFuren	LC698509.1	Ichikawa et al., 2023
Eriocheir japonica_LC698510.1_Japan:Hokkaido,LakeFuren	LC698510.1	Ichikawa et al., 2023
Eriocheir japonica_LC698511.1_Japan:Hokkaido,LakeFuren	LC698511.1	Ichikawa et al., 2023
Eriocheir japonica_LC698512.1_Japan:Hokkaido,LakeFuren	LC698512.1	Ichikawa et al., 2023
Eriocheir japonica_LC698513.1_Japan:Hokkaido,LakeFuren	LC698513.1	Ichikawa et al., 2023
Eriocheir japonica_LC698514.1_Japan:Hokkaido,LakeFuren	LC698514.1	Ichikawa et al., 2023
Eriocheir japonica_LC698515.1_Japan:Hokkaido,LakeFuren	LC698515.1	Ichikawa et al., 2023
Eriocheir japonica_LC698516.1_Japan:Hokkaido,LakeFuren	LC698516.1	Ichikawa et al., 2023
Eriocheir japonica_LC698517.1_Japan:Hokkaido,LakeFuren	LC698517.1	Ichikawa et al., 2023
Eriocheir japonica_LC698518.1_Japan:Hokkaido,LakeFuren	LC698518.1	Ichikawa et al., 2023
Eriocheir japonica_LC698519.1_Japan:Hokkaido,LakeFuren	LC698519.1	Ichikawa et al., 2023
Eriocheir japonica_LC698520.1_Japan:Hokkaido,LakeFuren	LC698520.1	Ichikawa et al., 2023
Eriocheir japonica_LC698521.1_Japan:Hokkaido,LakeFuren	LC698521.1	Ichikawa et al., 2023
Eriocheir japonica_LC698522.1_Japan:Hokkaido,LakeFuren	LC698522.1	Ichikawa et al., 2023
Eriocheir japonica_LC698523.1_Japan:Hokkaido,LakeFuren	LC698523.1	Ichikawa et al., 2023
Eriocheir japonica_LC698524.1_Japan:Hokkaido,LakeFuren	LC698524.1	Ichikawa et al., 2023
Eriocheir japonica_LC698525.1_Japan:Hokkaido,LakeFuren	LC698525.1	Ichikawa et al., 2023
Eriocheir japonica_LC698526.1_Japan:Hokkaido,LakeFuren	LC698526.1	Ichikawa et al., 2023
Eriocheir japonica_LC698527.1_Japan:Hokkaido,LakeFuren	LC698527.1	Ichikawa et al., 2023
Eriocheir japonica_LC698528.1_Japan:Hokkaido,LakeFuren	LC698528.1	Ichikawa et al., 2023
Eriocheir japonica_LC698529.1_Japan:Hokkaido,LakeFuren	LC698529.1	Ichikawa et al., 2023
Eriocheir japonica_LC698530.1_Japan:Hokkaido,LakeFuren	LC698530.1	Ichikawa et al., 2023
Eriocheir japonica_LC698531.1_Japan:Hokkaido,LakeFuren	LC698531.1	Ichikawa et al., 2023
Eriocheir japonica_LC698532.1_Japan:Hokkaido,LakeFuren	LC698532.1	Ichikawa et al., 2023
Eriocheir japonica_LC698533.1_Japan:Hokkaido,LakeFuren	LC698533.1	Ichikawa et al., 2023
Eriocheir japonica_LC698534.1_Japan:Hokkaido,AbashiriRiver	LC698534.1	Ichikawa et al., 2023
Eriocheir japonica_LC698535.1_Japan:Hokkaido,AbashiriRiver	LC698535.1	Ichikawa et al., 2023
Eriocheir japonica_LC698536.1_Japan:Hokkaido,AbashiriRiver	LC698536.1	Ichikawa et al., 2023
Eriocheir japonica_LC698537.1_Japan:Hokkaido,AbashiriRiver	LC698537.1	Ichikawa et al., 2023
Eriocheir japonica_LC698538.1_Japan:Hokkaido,AbashiriRiver	LC698538.1	Ichikawa et al., 2023
Eriocheir japonica_LC698539.1_Japan:Hokkaido,AbashiriRiver	LC698539.1	Ichikawa et al., 2023
Eriocheir japonica_LC698540.1_Japan:Hokkaido,AbashiriRiver	LC698540.1	Ichikawa et al., 2023
Eriocheir japonica_LC698541.1_Japan:Hokkaido,AbashiriRiver	LC698541.1	Ichikawa et al., 2023
Eriocheir japonica_LC698542.1_Japan:Hokkaido,AbashiriRiver	LC698542.1	Ichikawa et al., 2023
Eriocheir japonica_LC698543.1_Japan:Hokkaido,AbashiriRiver	LC698543.1	Ichikawa et al., 2023
Eriocheir japonica_LC698544.1_Japan:Hokkaido,AbashiriRiver	LC698544.1	Ichikawa et al., 2023
Eriocheir japonica_LC74329.1_Japan:Okinawa,Tokashiki	LC743297.1	Masaki et al., 2022
Eriocheir japonica_LC781994.1_Japan:Kagoshima-ken,OmoriRiver	LC781994.1	Chow et al., 2021
Eriocheir japonica_LC781995.1_Japan:Kagoshima-ken,OmoriRiver	LC781995.1	Chow et al., 2021
Eriocheir japonica_LC781996.1_Japan:Kagoshima-ken,OmoriRiver	LC781996.1	Chow et al., 2021
Eriocheir sinensis_MF156287.1_Russia:Primorje,Vladivostok,AmurBay	MF156287.1	Kang et al., 2018
Eriocheir sinensis_MF156288.1_Russia:Primorje,Vladivostok,AmurBay	MF156288.1	Kang et al., 2018
Eriocheir sinensis_MF156289.1_Russia:Primorje,Vladivostok,AmurBay	MF156289.1	Kang et al., 2018
Eriocheir sinensis_MF156290.1_Russia:Primorje,Vladivostok,AmurBay	MF156290.1	Kang et al., 2018
Eriocheir sinensis_MF156291.1_Russia:Primorje,Vladivostok,AmurBay	MF156291.1	Kang et al., 2018
Eriocheir sinensis_MF156292.1_Russia:Primorje,Vladivostok,AmurBay	MF156292.1	Kang et al., 2018
Eriocheir sinensis_MF156293.1_Russia:Primorje,Vladivostok,AmurBay	MF156293.1	Kang et al., 2018
Eriocheir sinensis_MF156294.1_Russia:Primorje,Vladivostok,AmurBay	MF156294.1	Kang et al., 2018
Eriocheir sinensis_MF156295.1_Russia:Primorje,Vladivostok,AmurBay	MF156295.1	Kang et al., 2018
Eriocheir sinensis_MF156296.1_Russia:Primorje,Vladivostok,AmurBay	MF156296.1	Kang et al., 2018
Eriocheir sinensis_MF156297.1_Russia:Primorje,Vladivostok,AmurBay	MF156297.1	Kang et al., 2018
Eriocheir sinensis_MF156298.1_Russia:Primorje,Vladivostok,AmurBay	MF156298.1	Kang et al., 2018
Eriocheir sinensis_MF156299.1_Russia:Primorje,Vladivostok,AmurBay	MF156299.1	Kang et al., 2018
Eriocheir sinensis_MF156300.1_Russia:Primorje,Vladivostok,AmurBay	MF156300.1	Kang et al., 2018
Eriocheir sinensis_MF156301.1_Russia:Primorje,Vladivostok,AmurBay	MF156301.1	Kang et al., 2018
Eriocheir sinensis_MF156302.1_Russia:Primorje,Vladivostok,AmurBay	MF156302.1	Kang et al., 2018
Eriocheir sinensis_MF156303.1_Russia:Primorje,Vladivostok,AmurBay	MF156303.1	Kang et al., 2018
Eriocheir sinensis_MF156304.1_Russia:Primorje,Vladivostok,AmurBay	MF156304.1	Kang et al., 2018
Eriocheir sinensis_MF156305.1_Russia:Primorje,Vladivostok,AmurBay	MF156305.1	Kang et al., 2018
Eriocheir sinensis_MF156306.1_Russia:Primorje,Vladivostok,AmurBay	MF156306.1	Kang et al., 2018
Eriocheir sinensis_MF156307.1_Russia:Primorje,Vladivostok,AmurBay	MF156307.1	Kang et al., 2018
Eriocheir sinensis_MF156308.1_Russia:Primorje,Vladivostok,AmurBay	MF156308.1	Kang et al., 2018
Eriocheir sinensis_MF156309.1_Russia:Primorje,Vladivostok,AmurBay	MF156309.1	Kang et al., 2018
Eriocheir sinensis_MF156310.1_Russia:Primorje,Vladivostok,AmurBay	MF156310.1	Kang et al., 2018
Eriocheir sinensis_MF156311.1_Russia:Primorje,Vladivostok,AmurBay	MF156311.1	Kang et al., 2018
Eriocheir sinensis_MF156312.1_Russia:Primorje,Vladivostok,AmurBay	MF156312.1	Kang et al., 2018
Eriocheir sinensis_MF156313.1_Russia:Primorje,Vladivostok,AmurBay	MF156313.1	Kang et al., 2018
Eriocheir sinensis_MF156314.1_Russia:Primorje,Vladivostok,AmurBay	MF156314.1	Kang et al., 2018
Eriocheir sinensis_MF156315.1_Russia:Primorje,Vladivostok,AmurBay	MF156315.1	Kang et al., 2018
Eriocheir sinensis_MF156316.1_Russia:Primorje,Vladivostok,AmurBay	MF156316.1	Kang et al., 2018
Eriocheir sinensis_MF156317.1_Russia:Primorje,Vladivostok,AmurBay	MF156317.1	Kang et al., 2018
Eriocheir sinensis_MF156318.1_Russia:Primorje,Vladivostok,AmurBay	MF156318.1	Kang et al., 2018
Eriocheir japonica_MF156319.1_Japan:Kagoshima	MF156319.1	Kang et al., 2018
Eriocheir japonica_MF156320.1_Japan:Kagoshima	MF156320.1	Kang et al., 2018
Eriocheir japonica_MF156321.1_Japan:Kagoshima	MF156321.1	Kang et al., 2018
Eriocheir japonica_MF156322.1_Japan:Kagoshima	MF156322.1	Kang et al., 2018
Eriocheir japonica_MF156323.1_Japan:Kagoshima	MF156323.1	Kang et al., 2018
Eriocheir japonica_MF156324.1_Japan:Kagoshima	MF156324.1	Kang et al., 2018
Eriocheir japonica_MF156325.1_Japan:Kagoshima	MF156325.1	Kang et al., 2018
Eriocheir japonica_MF156326.1_Japan:Kagoshima	MF156326.1	Kang et al., 2018
Eriocheir japonica_MF156327.1_Japan:Kagoshima	MF156327.1	Kang et al., 2018
Eriocheir japonica_MF156328.1_Japan:Kagoshima	MF156328.1	Kang et al., 2018
Eriocheir japonica_MF156329.1_Japan:Kagoshima	MF156329.1	Kang et al., 2018
Eriocheir japonica_MF156330.1_Japan:Kagoshima	MF156330.1	Kang et al., 2018
Eriocheir japonica_MF156331.1_Japan:Kagoshima	MF156331.1	Kang et al., 2018
Eriocheir japonica_MF156332.1_Japan:Kagoshima	MF156332.1	Kang et al., 2018
Eriocheir japonica_MF156333.1_Japan:Kagoshima	MF156333.1	Kang et al., 2018
Eriocheir japonica_MF156334.1_Japan:Kagoshima	MF156334.1	Kang et al., 2018
Eriocheir japonica_MF156335.1_Japan:Kagoshima	MF156335.1	Kang et al., 2018
Eriocheir japonica_MF156336.1_Japan:Kagoshima	MF156336.1	Kang et al., 2018
Eriocheir japonica_MF156337.1_Japan:Kagoshima	MF156337.1	Kang et al., 2018
Eriocheir japonica_MF156338.1_Japan:Kagoshima	MF156338.1	Kang et al., 2018
Eriocheir japonica_MF156339.1_Japan:Kagoshima	MF156339.1	Kang et al., 2018
Eriocheir japonica_MF156340.1_Japan:Hokkaido	MF156340.1	Kang et al., 2018
Eriocheir japonica_MF156341.1_Japan:Hokkaido	MF156341.1	Kang et al., 2018
Eriocheir japonica_MF156342.1_Japan:Hokkaido	MF156342.1	Kang et al., 2018
Eriocheir japonica_MF156343.1_Japan:Hokkaido	MF156343.1	Kang et al., 2018
Eriocheir japonica_MF156344.1_Japan:Hokkaido	MF156344.1	Kang et al., 2018
Eriocheir japonica_MF156345.1_Japan:Hokkaido	MF156345.1	Kang et al., 2018
Eriocheir sinensis_MF156346.1_NorthKorea:Hamgyŏng-pukto,TumenRiver	MF156346.1	Kang et al., 2018
Eriocheir sinensis_MF156347.1_NorthKorea:Hamgyŏng-pukto,TumenRiver	MF156347.1	Kang et al., 2018
Eriocheir sinensis_MF156348.1_NorthKorea:Hamgyŏng-pukto,TumenRiver	MF156348.1	Kang et al., 2018
Eriocheir sinensis_MF156349.1_NorthKorea:Hamgyŏng-pukto,TumenRiver	MF156349.1	Kang et al., 2018
Eriocheir sinensis_MF156350.1_NorthKorea:Hamgyŏng-pukto,TumenRiver	MF156350.1	Kang et al., 2018
Eriocheir sinensis_MF156351.1_NorthKorea:Hamgyŏng-pukto,TumenRiver	MF156351.1	Kang et al., 2018
Eriocheir sinensis_MF156352.1_NorthKorea:Hamgyŏng-pukto,TumenRiver	MF156352.1	Kang et al., 2018
Eriocheir sinensis_MF156353.1_NorthKorea:Hamgyŏng-pukto,TumenRiver	MF156353.1	Kang et al., 2018
Eriocheir sinensis_MF156354.1_NorthKorea:Hamgyŏng-pukto,TumenRiver	MF156354.1	Kang et al., 2018
Eriocheir sinensis_MF156355.1_NorthKorea:Hamgyŏng-pukto,TumenRiver	MF156355.1	Kang et al., 2018
Eriocheir sinensis_MF156356.1_NorthKorea:Hamgyŏng-pukto,TumenRiver	MF156356.1	Kang et al., 2018
Eriocheir sinensis_MF156357.1_NorthKorea:Hamgyŏng-pukto,TumenRiver	MF156357.1	Kang et al., 2018
Eriocheir sinensis_MF156358.1_NorthKorea:Hamgyŏng-pukto,TumenRiver	MF156358.1	Kang et al., 2018
Eriocheir sinensis_MF156359.1_NorthKorea:Hamgyŏng-pukto,TumenRiver	MF156359.1	Kang et al., 2018
Eriocheir sinensis_MF156360.1_NorthKorea:Hamgyŏng-pukto,TumenRiver	MF156360.1	Kang et al., 2018
Eriocheir sinensis_MF156361.1_NorthKorea:Hamgyŏng-pukto,TumenRiver	MF156361.1	Kang et al., 2018
Eriocheir sinensis_MF156362.1_NorthKorea:Hamgyŏng-pukto,TumenRiver	MF156362.1	Kang et al., 2018
Eriocheir sinensis_MF156363.1_NorthKorea:Hamgyŏng-pukto,TumenRiver	MF156363.1	Kang et al., 2018
Eriocheir sinensis_MF156364.1_NorthKorea:Hamgyŏng-pukto,TumenRiver	MF156364.1	Kang et al., 2018
Eriocheir sinensis_MF156365.1_NorthKorea:Hamgyŏng-pukto,TumenRiver	MF156365.1	Kang et al., 2018
Eriocheir sinensis_MF156366.1_NorthKorea:Hamgyŏng-pukto,TumenRiver	MF156366.1	Kang et al., 2018
Eriocheir sinensis_MF156367.1_NorthKorea:Hamgyŏng-pukto,TumenRiver	MF156367.1	Kang et al., 2018
Eriocheir sinensis_MF156368.1_NorthKorea:Hamgyŏng-pukto,TumenRiver	MF156368.1	Kang et al., 2018
Eriocheir sinensis_MF156369.1_NorthKorea:Hamgyŏng-pukto,TumenRiver	MF156369.1	Kang et al., 2018
Eriocheir sinensis_MF156370.1_NorthKorea:Hamgyŏng-pukto,TumenRiver	MF156370.1	Kang et al., 2018
Eriocheir sinensis_MF156371.1_NorthKorea:Hamgyŏng-pukto,TumenRiver	MF156371.1	Kang et al., 2018
Eriocheir sinensis_MF156372.1_NorthKorea:Hamgyŏng-pukto,TumenRiver	MF156372.1	Kang et al., 2018
Eriocheir sinensis_MF156373.1_NorthKorea:Hamgyŏng-pukto,TumenRiver	MF156373.1	Kang et al., 2018
Eriocheir sinensis_MF156374.1_NorthKorea:Hamgyŏng-pukto,TumenRiver	MF156374.1	Kang et al., 2018
Eriocheir sinensis_MF156375.1_NorthKorea:Hamgyŏng-pukto,TumenRiver	MF156375.1	Kang et al., 2018
Eriocheir sinensis_MF156376.1_China:Liaoning,LiaoRiver	MF156376.1	Kang et al., 2018
Eriocheir sinensis_MF156377.1_China:Liaoning,LiaoRiver	MF156377.1	Kang et al., 2018
Eriocheir sinensis_MF156378.1_China:Liaoning,LiaoRiver	MF156378.1	Kang et al., 2018
Eriocheir sinensis_MF156379.1_China:Liaoning,LiaoRiver	MF156379.1	Kang et al., 2018
Eriocheir sinensis_MF156380.1_China:Liaoning,LiaoRiver	MF156380.1	Kang et al., 2018
Eriocheir sinensis_MF156381.1_China:Liaoning,LiaoRiver	MF156381.1	Kang et al., 2018
Eriocheir sinensis_MF156382.1_China:Liaoning,LiaoRiver	MF156382.1	Kang et al., 2018
Eriocheir sinensis_MF156383.1_China:Liaoning,LiaoRiver	MF156383.1	Kang et al., 2018
Eriocheir sinensis_MF156384.1_China:Liaoning,LiaoRiver	MF156384.1	Kang et al., 2018
Eriocheir sinensis_MF156385.1_China:Liaoning,LiaoRiver	MF156385.1	Kang et al., 2018
Eriocheir sinensis_MF156386.1_China:Liaoning,LiaoRiver	MF156386.1	Kang et al., 2018
Eriocheir sinensis_MF156387.1_China:Liaoning,LiaoRiver	MF156387.1	Kang et al., 2018
Eriocheir sinensis_MF156388.1_China:Liaoning,LiaoRiver	MF156388.1	Kang et al., 2018
Eriocheir sinensis_MF156389.1_China:Liaoning,LiaoRiver	MF156389.1	Kang et al., 2018
Eriocheir sinensis_MF156390.1_China:Liaoning,LiaoRiver	MF156390.1	Kang et al., 2018
Eriocheir sinensis_MF156391.1_China:Liaoning,LiaoRiver	MF156391.1	Kang et al., 2018
Eriocheir sinensis_MF156392.1_China:Liaoning,LiaoRiver	MF156392.1	Kang et al., 2018
Eriocheir sinensis_MF156393.1_China:Liaoning,LiaoRiver	MF156393.1	Kang et al., 2018
Eriocheir sinensis_MF156394.1_China:Liaoning,LiaoRiver	MF156394.1	Kang et al., 2018
Eriocheir sinensis_MF156395.1_China:Liaoning,LiaoRiver	MF156395.1	Kang et al., 2018
Eriocheir sinensis_MF156396.1_China:Liaoning,LiaoRiver	MF156396.1	Kang et al., 2018
Eriocheir sinensis_MF156397.1_China:Liaoning,LiaoRiver	MF156397.1	Kang et al., 2018
Eriocheir sinensis_MF156398.1_China:Liaoning,LiaoRiver	MF156398.1	Kang et al., 2018
Eriocheir sinensis_MF156399.1_China:Liaoning,LiaoRiver	MF156399.1	Kang et al., 2018
Eriocheir sinensis_MF156400.1_China:Liaoning,LiaoRiver	MF156400.1	Kang et al., 2018
Eriocheir sinensis_MF156401.1_China:Liaoning,LiaoRiver	MF156401.1	Kang et al., 2018
Eriocheir sinensis_MF156402.1_China:Liaoning,LiaoRiver	MF156402.1	Kang et al., 2018
Eriocheir sinensis_MF156403.1_China:Liaoning,LiaoRiver	MF156403.1	Kang et al., 2018
Eriocheir sinensis_MF156404.1_China:Liaoning,LiaoRiver	MF156404.1	Kang et al., 2018
Eriocheir sinensis_MF156405.1_China:Liaoning,LiaoRiver	MF156405.1	Kang et al., 2018
Eriocheir sinensis_MF156406.1_China:Liaoning,LiaoRiver	MF156406.1	Kang et al., 2018
Eriocheir sinensis_MF156407.1_China:Liaoning,LiaoRiver	MF156407.1	Kang et al., 2018
Eriocheir sinensis_MF156408.1_China:Liaoning,LiaoRiver	MF156408.1	Kang et al., 2018
Eriocheir sinensis_MF156409.1_China:Liaoning,LiaoRiver	MF156409.1	Kang et al., 2018
Eriocheir sinensis_MF156410.1_China:Liaoning,LiaoRiver	MF156410.1	Kang et al., 2018
Eriocheir sinensis_MF156411.1_China:Liaoning,LiaoRiver	MF156411.1	Kang et al., 2018
Eriocheir sinensis_MF156412.1_China:Liaoning,LiaoRiver	MF156412.1	Kang et al., 2018
Eriocheir sinensis_MF156413.1_China:Liaoning,LiaoRiver	MF156413.1	Kang et al., 2018
Eriocheir sinensis_MF156414.1_China:Liaoning,LiaoRiver	MF156414.1	Kang et al., 2018
Eriocheir sinensis_MF156415.1_China:Liaoning,LiaoRiver	MF156415.1	Kang et al., 2018
Eriocheir sinensis_MF156416.1_China:Liaoning,LiaoRiver	MF156416.1	Kang et al., 2018
Eriocheir sinensis_MF156417.1_China:Liaoning,LiaoRiver	MF156417.1	Kang et al., 2018
Eriocheir sinensis_MF156418.1_China:Liaoning,LiaoRiver	MF156418.1	Kang et al., 2018
Eriocheir sinensis_MF156419.1_China:Liaoning,LiaoRiver	MF156419.1	Kang et al., 2018
Eriocheir sinensis_MF156420.1_China:Liaoning,LiaoRiver	MF156420.1	Kang et al., 2018
Eriocheir sinensis_MF156421.1_China:Liaoning,LiaoRiver	MF156421.1	Kang et al., 2018
Eriocheir sinensis_MF156422.1_China:Liaoning,LiaoRiver	MF156422.1	Kang et al., 2018
Eriocheir sinensis_MF156423.1_China:Liaoning,LiaoRiver	MF156423.1	Kang et al., 2018
Eriocheir sinensis_MF156424.1_China:Liaoning,LiaoRiver	MF156424.1	Kang et al., 2018
Eriocheir sinensis_MF156425.1_China:Liaoning,LiaoRiver	MF156425.1	Kang et al., 2018
Eriocheir sinensis_MF156426.1_China:Liaoning,LiaoRiver	MF156426.1	Kang et al., 2018
Eriocheir sinensis_MF156427.1_China:Liaoning,LiaoRiver	MF156427.1	Kang et al., 2018
Eriocheir sinensis_MF156428.1_China:Liaoning,LiaoRiver	MF156428.1	Kang et al., 2018
Eriocheir sinensis_MF156429.1_China:Liaoning,LiaoRiver	MF156429.1	Kang et al., 2018
Eriocheir sinensis_MF156430.1_China:Liaoning,LiaoRiver	MF156430.1	Kang et al., 2018
Eriocheir sinensis_MF156431.1_China:Liaoning,LiaoRiver	MF156431.1	Kang et al., 2018
Eriocheir sinensis_MF156432.1_China:Liaoning,LiaoRiver	MF156432.1	Kang et al., 2018
Eriocheir sinensis_MF156433.1_China:Liaoning,LiaoRiver	MF156433.1	Kang et al., 2018
Eriocheir sinensis_MF156434.1_China:Liaoning,LiaoRiver	MF156434.1	Kang et al., 2018
Eriocheir sinensis_MF156435.1_China:Liaoning,LiaoRiver	MF156435.1	Kang et al., 2018
Eriocheir sinensis_MF156436.1_China:Liaoning,LiaoRiver	MF156436.1	Kang et al., 2018
Eriocheir sinensis_MF156437.1_China:Liaoning,LiaoRiver	MF156437.1	Kang et al., 2018
Eriocheir sinensis_MF156438.1_China:Liaoning,LiaoRiver	MF156438.1	Kang et al., 2018
Eriocheir sinensis_MF156439.1_China:Liaoning,LiaoRiver	MF156439.1	Kang et al., 2018
Eriocheir sinensis_MF156440.1_China:Liaoning,LiaoRiver	MF156440.1	Kang et al., 2018
Eriocheir sinensis_MF156441.1_China:Liaoning,LiaoRiver	MF156441.1	Kang et al., 2018
Eriocheir sinensis_MF156442.1_China:Liaoning,LiaoRiver	MF156442.1	Kang et al., 2018
Eriocheir sinensis_MF156443.1_China:Liaoning,LiaoRiver	MF156443.1	Kang et al., 2018
Eriocheir sinensis_MF156444.1_China:Liaoning,LiaoRiver	MF156444.1	Kang et al., 2018
Eriocheir sinensis_MF156445.1_China:Liaoning,LiaoRiver	MF156445.1	Kang et al., 2018
Eriocheir sinensis_MF156446.1_China:Liaoning,LiaoRiver	MF156446.1	Kang et al., 2018
Eriocheir sinensis_MF156447.1_China:Liaoning,LiaoRiver	MF156447.1	Kang et al., 2018
Eriocheir sinensis_MF156448.1_China:Liaoning,LiaoRiver	MF156448.1	Kang et al., 2018
Eriocheir sinensis_MF156449.1_China:Liaoning,LiaoRiver	MF156449.1	Kang et al., 2018
Eriocheir sinensis_MF156450.1_China:Liaoning,LiaoRiver	MF156450.1	Kang et al., 2018
Eriocheir sinensis_MF156451.1_China:Tianjin,Tianjin,YellowRiver	MF156451.1	Kang et al., 2018
Eriocheir sinensis_MF156452.1_China:Tianjin,Tianjin,YellowRiver	MF156452.1	Kang et al., 2018
Eriocheir sinensis_MF156453.1_China:Tianjin,Tianjin,YellowRiver	MF156453.1	Kang et al., 2018
Eriocheir sinensis_MF156454.1_China:Tianjin,Tianjin,YellowRiver	MF156454.1	Kang et al., 2018
Eriocheir sinensis_MF156455.1_China:Tianjin,Tianjin,YellowRiver	MF156455.1	Kang et al., 2018
Eriocheir sinensis_MF156456.1_China:Tianjin,Tianjin,YellowRiver	MF156456.1	Kang et al., 2018
Eriocheir sinensis_MF156457.1_China:Tianjin,Tianjin,YellowRiver	MF156457.1	Kang et al., 2018
Eriocheir sinensis_MF156458.1_China:Tianjin,Tianjin,YellowRiver	MF156458.1	Kang et al., 2018
Eriocheir sinensis_MF156459.1_China:Tianjin,Tianjin,YellowRiver	MF156459.1	Kang et al., 2018
Eriocheir sinensis_MF156460.1_China:Tianjin,Tianjin,YellowRiver	MF156460.1	Kang et al., 2018
Eriocheir sinensis_MF156461.1_China:Tianjin,Tianjin,YellowRiver	MF156461.1	Kang et al., 2018
Eriocheir sinensis_MF156462.1_China:Tianjin,Tianjin,YellowRiver	MF156462.1	Kang et al., 2018
Eriocheir sinensis_MF156463.1_China:Tianjin,Tianjin,YellowRiver	MF156463.1	Kang et al., 2018
Eriocheir sinensis_MF156464.1_China:Tianjin,Tianjin,YellowRiver	MF156464.1	Kang et al., 2018
Eriocheir sinensis_MF156465.1_China:Tianjin,Tianjin,YellowRiver	MF156465.1	Kang et al., 2018
Eriocheir sinensis_MF156466.1_China:Tianjin,Tianjin,YellowRiver	MF156466.1	Kang et al., 2018
Eriocheir sinensis_MF156467.1_China:Tianjin,Tianjin,YellowRiver	MF156467.1	Kang et al., 2018
Eriocheir sinensis_MF156468.1_China:Tianjin,Tianjin,YellowRiver	MF156468.1	Kang et al., 2018
Eriocheir sinensis_MF156469.1_China:Tianjin,Tianjin,YellowRiver	MF156469.1	Kang et al., 2018
Eriocheir sinensis_MF156470.1_China:Tianjin,Tianjin,YellowRiver	MF156470.1	Kang et al., 2018
Eriocheir sinensis_MF156471.1_China:Tianjin,Tianjin,YellowRiver	MF156471.1	Kang et al., 2018
Eriocheir sinensis_MF156472.1_China:Tianjin,Tianjin,YellowRiver	MF156472.1	Kang et al., 2018
Eriocheir sinensis_MF156473.1_China:Tianjin,Tianjin,YellowRiver	MF156473.1	Kang et al., 2018
Eriocheir sinensis_MF156474.1_China:Tianjin,Tianjin,YellowRiver	MF156474.1	Kang et al., 2018
Eriocheir sinensis_MF156475.1_China:Tianjin,Tianjin,YellowRiver	MF156475.1	Kang et al., 2018
Eriocheir sinensis_MF156476.1_China:Tianjin,Tianjin,YellowRiver	MF156476.1	Kang et al., 2018
Eriocheir sinensis_MF156477.1_China:Tianjin,Tianjin,YellowRiver	MF156477.1	Kang et al., 2018
Eriocheir sinensis_MF156478.1_China:Tianjin,Tianjin,YellowRiver	MF156478.1	Kang et al., 2018
Eriocheir sinensis_MF156479.1_China:Tianjin,Tianjin,YellowRiver	MF156479.1	Kang et al., 2018
Eriocheir sinensis_MF156480.1_China:Tianjin,Tianjin,YellowRiver	MF156480.1	Kang et al., 2018
Eriocheir sinensis_MF156481.1_China:Tianjin,Tianjin,YellowRiver	MF156481.1	Kang et al., 2018
Eriocheir sinensis_MF156482.1_China:Tianjin,Tianjin,YellowRiver	MF156482.1	Kang et al., 2018
Eriocheir sinensis_MF156483.1_China:Tianjin,Tianjin,YellowRiver	MF156483.1	Kang et al., 2018
Eriocheir sinensis_MF156484.1_China:Tianjin,Tianjin,YellowRiver	MF156484.1	Kang et al., 2018
Eriocheir sinensis_MF156485.1_China:Tianjin,Tianjin,YellowRiver	MF156485.1	Kang et al., 2018
Eriocheir sinensis_MF156486.1_China:Tianjin,Tianjin,YellowRiver	MF156486.1	Kang et al., 2018
Eriocheir sinensis_MF156487.1_China:Tianjin,Tianjin,YellowRiver	MF156487.1	Kang et al., 2018
Eriocheir sinensis_MF156488.1_China:Tianjin,Tianjin,YellowRiver	MF156488.1	Kang et al., 2018
Eriocheir sinensis_MF156489.1_China:Tianjin,Tianjin,YellowRiver	MF156489.1	Kang et al., 2018
Eriocheir sinensis_MF156490.1_China:Tianjin,Tianjin,YellowRiver	MF156490.1	Kang et al., 2018
Eriocheir sinensis_MF156491.1_China:Tianjin,Tianjin,YellowRiver	MF156491.1	Kang et al., 2018
Eriocheir sinensis_MF156492.1_China:Tianjin,Tianjin,YellowRiver	MF156492.1	Kang et al., 2018
Eriocheir sinensis_MF156493.1_China:Tianjin,Tianjin,YellowRiver	MF156493.1	Kang et al., 2018
Eriocheir sinensis_MF156494.1_China:Tianjin,Tianjin,YellowRiver	MF156494.1	Kang et al., 2018
Eriocheir sinensis_MF156495.1_China:Tianjin,Tianjin,YellowRiver	MF156495.1	Kang et al., 2018
Eriocheir sinensis_MF156496.1_China:Tianjin,Tianjin,YellowRiver	MF156496.1	Kang et al., 2018
Eriocheir sinensis_MF156497.1_China:Tianjin,Tianjin,YellowRiver	MF156497.1	Kang et al., 2018
Eriocheir sinensis_MF156498.1_China:Tianjin,Tianjin,YellowRiver	MF156498.1	Kang et al., 2018
Eriocheir sinensis_MF156499.1_China:Tianjin,Tianjin,YellowRiver	MF156499.1	Kang et al., 2018
Eriocheir sinensis_MF156500.1_China:Tianjin,Tianjin,YellowRiver	MF156500.1	Kang et al., 2018
Eriocheir sinensis_MF156501.1_China:Tianjin,Tianjin,YellowRiver	MF156501.1	Kang et al., 2018
Eriocheir sinensis_MF156502.1_China:Tianjin,Tianjin,YellowRiver	MF156502.1	Kang et al., 2018
Eriocheir sinensis_MF156503.1_China:Tianjin,Tianjin,YellowRiver	MF156503.1	Kang et al., 2018
Eriocheir sinensis_MF156504.1_China:Tianjin,Tianjin,YellowRiver	MF156504.1	Kang et al., 2018
Eriocheir sinensis_MF156505.1_China:Tianjin,Tianjin,YellowRiver	MF156505.1	Kang et al., 2018
Eriocheir sinensis_MF156506.1_China:Tianjin,Tianjin,YellowRiver	MF156506.1	Kang et al., 2018
Eriocheir sinensis_MF156507.1_China:Tianjin,Tianjin,YellowRiver	MF156507.1	Kang et al., 2018
Eriocheir sinensis_MF156508.1_China:Tianjin,Tianjin,YellowRiver	MF156508.1	Kang et al., 2018
Eriocheir sinensis_MF156509.1_China:Tianjin,Tianjin,YellowRiver	MF156509.1	Kang et al., 2018
Eriocheir japonica_MW770262.1_SouthKorea:Jeju-do	MW770262.1	Oh et al., 2023
Eriocheir japonica_MW770263.1_SouthKorea:Jeju-do	MW770263.1	Oh et al., 2023
Eriocheir japonica_MW770264.1_SouthKorea:Jeju-do	MW770264.1	Oh et al., 2023
Eriocheir japonica_MW770265.1_SouthKorea:Jeju-do	MW770265.1	Oh et al., 2023
Eriocheir japonica_MW770266.1_SouthKorea:Jeju-do	MW770266.1	Oh et al., 2023
Eriocheir japonica_MW770267.1_SouthKorea:Jeju-do	MW770267.1	Oh et al., 2023
Eriocheir japonica_MW770268.1_SouthKorea:Jeju-do	MW770268.1	Oh et al., 2023
Eriocheir japonica_MW770269.1_SouthKorea:Jeju-do	MW770269.1	Oh et al., 2023
Eriocheir japonica_MW770270.1_SouthKorea:Jeju-do	MW770270.1	Oh et al., 2023
Eriocheir japonica_MW770271.1_SouthKorea:Jeju-do	MW770271.1	Oh et al., 2023
Eriocheir japonica_MW770272.1_SouthKorea:Jeju-do	MW770272.1	Oh et al., 2023
Eriocheir japonica_MW770273.1_SouthKorea:Jeju-do	MW770273.1	Oh et al., 2023
Eriocheir japonica_MW770274.1_SouthKorea:Jeju-do	MW770274.1	Oh et al., 2023
Eriocheir japonica_MW770275.1_SouthKorea:Jeju-do	MW770275.1	Oh et al., 2023
Eriocheir japonica_MW770276.1_SouthKorea:Jeju-do	MW770276.1	Oh et al., 2023
Eriocheir japonica_MW770277.1_SouthKorea:Jeju-do	MW770277.1	Oh et al., 2023
Eriocheir japonica_MW770278.1_SouthKorea:Jeju-do	MW770278.1	Oh et al., 2023
Eriocheir japonica_MW770279.1_SouthKorea:Jeju-do	MW770279.1	Oh et al., 2023
Eriocheir japonica_MW770280.1_SouthKorea:Jeju-do	MW770280.1	Oh et al., 2023
Eriocheir japonica_MW770281.1_SouthKorea:Jeju-do	MW770281.1	Oh et al., 2023
Eriocheir japonica_MW770282.1_SouthKorea:Jeju-do	MW770282.1	Oh et al., 2023
Eriocheir japonica_MW770283.1_SouthKorea:Jeju-do	MW770283.1	Oh et al., 2023
Eriocheir japonica_MW770284.1_SouthKorea:Jeju-do	MW770284.1	Oh et al., 2023
Eriocheir japonica_MW770285.1_SouthKorea:Jeju-do	MW770285.1	Oh et al., 2023
Eriocheir japonica_MW770286.1_SouthKorea:Jeju-do	MW770286.1	Oh et al., 2023
Eriocheir japonica_MW770287.1_SouthKorea:Jeju-do	MW770287.1	Oh et al., 2023
Eriocheir japonica_MW770288.1_SouthKorea:Jeju-do	MW770288.1	Oh et al., 2023
Eriocheir japonica_MW770289.1_SouthKorea:Jeju-do	MW770289.1	Oh et al., 2023
Eriocheir japonica_MW770290.1_SouthKorea:Jeju-do	MW770290.1	Oh et al., 2023
Eriocheir japonica_MW770291.1_SouthKorea:Jeju-do	MW770291.1	Oh et al., 2023
Eriocheir japonica_MW770292.1_SouthKorea:Jeju-do	MW770292.1	Oh et al., 2023
Eriocheir japonica_MW770293.1_SouthKorea:Jeju-do	MW770293.1	Oh et al., 2023
Eriocheir japonica_MW770294.1_SouthKorea:Jeju-do	MW770294.1	Oh et al., 2023
Eriocheir japonica_MW770295.1_SouthKorea:Jeju-do	MW770295.1	Oh et al., 2023
Eriocheir japonica_MW770296.1_SouthKorea:Jeju-do	MW770296.1	Oh et al., 2023
Eriocheir japonica_MW770297.1_SouthKorea:Jeju-do	MW770297.1	Oh et al., 2023
Eriocheir japonica_MW770298.1_SouthKorea:Jeju-do	MW770298.1	Oh et al., 2023
Eriocheir japonica_MW770299.1_SouthKorea:Jeju-do	MW770299.1	Oh et al., 2023
Eriocheir japonica_MW770300.1_SouthKorea:Jeju-do	MW770300.1	Oh et al., 2023
Eriocheir japonica_MW770301.1_SouthKorea:Jeju-do	MW770301.1	Oh et al., 2023
Eriocheir japonica_MW770302.1_SouthKorea:Jeju-do	MW770302.1	Oh et al., 2023
Eriocheir japonica_MW770303.1_SouthKorea:Jeju-do	MW770303.1	Oh et al., 2023
Eriocheir japonica_MW770304.1_SouthKorea:Jeju-do	MW770304.1	Oh et al., 2023
Eriocheir japonica_MW770305.1_SouthKorea:Jeju-do	MW770305.1	Oh et al., 2023
Eriocheir japonica_MW770306.1_SouthKorea:Jeju-do	MW770306.1	Oh et al., 2023
Eriocheir japonica_MW770307.1_SouthKorea:Jeju-do	MW770307.1	Oh et al., 2023
Eriocheir_sinensis_NC006992_China:Anhui,Wuhu,YangtzeRiver	NC006992	Sun et al., 2005b
Eriocheir sinensis_OP143822.1_SouthKorea:Gyeonggi-do	OP143822.1	An et al., 2022
Eriocheir sinensis_OP143823.1_SouthKorea:Gyeonggi-do	OP143823.1	An et al., 2022
Eriocheir sinensis_OP143824.1_SouthKorea:Gyeonggi-do	OP143824.1	An et al., 2022
Eriocheir sinensis_OP143825.1_SouthKorea:Gyeonggi-do	OP143825.1	An et al., 2022
Eriocheir sinensis_OP143826.1_SouthKorea:Gyeonggi-do	OP143826.1	An et al., 2022
Eriocheir sinensis_OP143827.1_SouthKorea:Gyeonggi-do	OP143827.1	An et al., 2022
Eriocheir sinensis_OP143828.1_SouthKorea:Gyeonggi-do	OP143828.1	An et al., 2022
Eriocheir sinensis_OP143829.1_SouthKorea:Gyeonggi-do	OP143829.1	An et al., 2022
Eriocheir sinensis_OP143830.1_SouthKorea:Gyeonggi-do	OP143830.1	An et al., 2022
Eriocheir sinensis_OP143831.1_SouthKorea:Gyeonggi-do	OP143831.1	An et al., 2022
Eriocheir sinensis_OP143832.1_SouthKorea:Gyeonggi-do	OP143832.1	An et al., 2022
Eriocheir sinensis_OP143833.1_SouthKorea:Gyeonggi-do	OP143833.1	An et al., 2022
Eriocheir sinensis_OP143834.1_SouthKorea:Gyeonggi-do	OP143834.1	An et al., 2022
Eriocheir sinensis_OP143835.1_SouthKorea:Gyeonggi-do	OP143835.1	An et al., 2022
Eriocheir sinensis_OP143836.1_SouthKorea:Gyeonggi-do	OP143836.1	An et al., 2022
Eriocheir sinensis_OP143837.1_SouthKorea:Gyeonggi-do	OP143837.1	An et al., 2022
Eriocheir sinensis_OP143838.1_SouthKorea:Gyeonggi-do	OP143838.1	An et al., 2022
Eriocheir sinensis_OP143839.1_SouthKorea:Gyeonggi-do	OP143839.1	An et al., 2022
Eriocheir_sinensis_SRR10223922_China:Shandong,Dongying,YellowRiver	SRR10223922	Cui et al., 2021
Eriocheir_sinensis_SRR10223923_China:Shandong,Dongying,YellowRiver	SRR10223923	Cui et al., 2021
Eriocheir_sinensis_SRR10223924_China:Shandong,Dongying,YellowRiver	SRR10223924	Cui et al., 2021
Eriocheir_sinensis_SRR10223925_China:Shandong,Dongying,YellowRiver	SRR10223925	Cui et al., 2021
Eriocheir_sinensis_SRR10223926_China:Shandong,Dongying,YellowRiver	SRR10223926	Cui et al., 2021
Eriocheir_sinensis_SRR10223927_China:Shanghai,Shanghai,YangtzeRiver	SRR10223927	Cui et al., 2021
Eriocheir_ogasawaraensis_SRR10223930_Japan:Ogasawara	SRR10223930	Cui et al., 2021
Eriocheir_japonica_SRR10223932_China:Guangdong,Hongkong	SRR10223932	Cui et al., 2021
Eriocheir_japonica_SRR10223933_Japan:Okinawa	SRR10223933	Cui et al., 2021
Eriocheir_japonica_SRR10223934_Japan:Osaka	SRR10223934	Cui et al., 2021
Eriocheir_sinensis_SRR10223935_China:Shanghai,Shanghai,YangtzeRiver	SRR10223935	Cui et al., 2021
Eriocheir_sinensis_SRR10223946_China:Shanghai,Shanghai,YangtzeRiver	SRR10223946	Cui et al., 2021
Eriocheir_sinensis_SRR10223952_China:Liaoning,Panjin,LiaoheRiver	SRR10223952	Cui et al., 2021
Eriocheir_sinensis_SRR10223953_China:Liaoning,Panjin,LiaoheRiver	SRR10223953	Cui et al., 2021
Eriocheir_sinensis_SRR10223954_China:Liaoning,Panjin,LiaoheRiver	SRR10223954	Cui et al., 2021
Eriocheir_sinensis_SRR10223955_China:Liaoning,Pajin,LiaoheRiver	SRR10223955	Cui et al., 2021
Eriocheir_sinensis_SRR10223956_China:Liaoning,Pajin,LiaoheRiver	SRR10223956	Cui et al., 2021
Eriocheir_sinensis_SRR10223957_China:Shanghai,Shanghai,YangtzeRiver	SRR10223957	Cui et al., 2021
Eriocheir_sinensis_SRR10223958_China:Shanghai,Shanghai,YangtzeRiver	SRR10223958	Cui et al., 2021
Eriocheir_sinensis_AF105248_Taiwan:Tainan,Yongkang	AF105248	Unpublished
Eriocheir_sinensis_AF279269_China:Shandong	AF279269	Unpublished
Eriocheir_sinensis_DQ438943_China:YangtzeRiver	DQ438943	Unpublished
Eriocheir_sinensis_KY041629_China:YangtzeRiver	KY041629	Unpublished
Eriocheir sinensis_DQ438944.1_China:YangtzeRiver	DQ438944.1	Unpublished
Eriocheir hepuensis_FJ455506.1_China:Guangxi,Nanliujiang	FJ455506	Wang et al. 2016
Eriocheir japonica_FJ455505.1_Japan:Tokyo,Tokyo,Shiodomarikawa	FJ455505	Wang et al. 2016
Eriocheir hepuensis_MK159104.1_China:Guangxi,Nanjiujiang	MK159104	Zhang et al., 2019
