# Supplementary material
Source: Research Square preprint supplement (doi:10.21203/rs.3.rs-9149727/v1)
Supplement: Supplementary file 3 [file bf88fd1cf710aba97acbddd9.xlsx]

## Sheet: Mastersheet
Label	Location	Collection date	Collection year	Season	Fragment length	Mitospecies	Haplotype
BE18_02	Grobbendonk	2018-04-12	2018	Spring	Sequence	japonica	E. japonica H1
BE18_05	Grobbendonk	2018-04-12	2018	Spring	Sequence	japonica	E. japonica H1
BE18_08	Grobbendonk	2018-04-12	2018	Spring	Sequence	japonica	E. japonica H1
BE18_09	Grobbendonk	2018-04-12	2018	Spring	Sequence	japonica	E. japonica H1
BE18_14	Grobbendonk	2018-05-11	2018	Spring	Sequence	japonica	E. japonica H1
BE18_17	Grobbendonk	2018-05-11	2018	Spring	Sequence	japonica	E. japonica H1
BE18_18	Grobbendonk	2018-05-11	2018	Spring	Sequence	japonica	E. japonica H1
BE18_19	Grobbendonk	2018-05-11	2018	Spring	Sequence	japonica	E. japonica H1
BE18_03	Grobbendonk	2018-04-12	2018	Spring	Sequence	japonica	E. japonica H2
BE18_06	Grobbendonk	2018-04-12	2018	Spring	long	japonica
BE18_07	Grobbendonk	2018-04-12	2018	Spring	long	japonica
BE18_10	Grobbendonk	2018-04-12	2018	Spring	long	japonica
BE18_13	Grobbendonk	2018-05-11	2018	Spring	long	japonica
BE18_15	Grobbendonk	2018-05-11	2018	Spring	long	japonica
BE18_159	Grobbendonk	2018-03-27	2018	Spring	long	japonica
BE18_16	Grobbendonk	2018-05-11	2018	Spring	long	japonica
BE18_160	Grobbendonk	2018-03-27	2018	Spring	long	japonica
BE18_161	Grobbendonk	2018-03-27	2018	Spring	long	japonica
BE18_162	Grobbendonk	2018-03-27	2018	Spring	long	japonica
BE18_163	Grobbendonk	2018-03-27	2018	Spring	long	japonica
BE18_164	Grobbendonk	2018-03-27	2018	Spring	long	japonica
BE18_166	Grobbendonk	2018-03-27	2018	Spring	long	japonica
BE18_167	Grobbendonk	2018-03-27	2018	Spring	long	japonica
BE18_168	Grobbendonk	2018-03-27	2018	Spring	long	japonica
BE18_170	Grobbendonk	2018-03-27	2018	Spring	long	japonica
BE18_171	Grobbendonk	2018-03-27	2018	Spring	long	japonica
BE18_173	Grobbendonk	2018-05-07	2018	Spring	long	japonica
BE18_174	Grobbendonk	2018-05-07	2018	Spring	long	japonica
BE18_175	Grobbendonk	2018-05-07	2018	Spring	long	japonica
BE18_176	Grobbendonk	2018-05-07	2018	Spring	long	japonica
BE18_177	Grobbendonk	2018-05-07	2018	Spring	long	japonica
BE18_178	Grobbendonk	2018-05-07	2018	Spring	long	japonica
BE18_179	Grobbendonk	2018-05-07	2018	Spring	long	japonica
BE18_181	Grobbendonk	2018-05-07	2018	Spring	long	japonica
BE18_183	Grobbendonk	2018-05-07	2018	Spring	long	japonica
BE18_184	Grobbendonk	2018-05-07	2018	Spring	long	japonica
BE18_185	Grobbendonk	2018-05-07	2018	Spring	long	japonica
BE18_186	Grobbendonk	2018-05-07	2018	Spring	long	japonica
BE18_20	Grobbendonk	2018-05-11	2018	Spring	Sequence	japonica	E. japonica H1
BE18_04	Grobbendonk	2018-04-12	2018	Spring	Sequence	sinensis	H1
BE18_01	Grobbendonk	2018-04-12	2018	Spring	Sequence	sinensis	H18
BE18_11	Grobbendonk	2018-05-11	2018	Spring	Sequence	sinensis	H3
BE18_12	Grobbendonk	2018-05-11	2018	Spring	short	sinensis
BE18_157	Grobbendonk	2018-03-27	2018	Spring	short	sinensis
BE18_158	Grobbendonk	2018-03-27	2018	Spring	short	sinensis
BE18_169	Grobbendonk	2018-03-27	2018	Spring	short	sinensis
BE18_172	Grobbendonk	2018-05-07	2018	Spring	short	sinensis
BE18_180	Grobbendonk	2018-05-07	2018	Spring	short	sinensis
BE18_182	Grobbendonk	2018-05-07	2018	Spring	short	sinensis
BE18_187	Grobbendonk	2018-09-18	2018	Fall	long	japonica
BE18_188	Grobbendonk	2018-09-18	2018	Fall	long	japonica
BE18_189	Grobbendonk	2018-09-18	2018	Fall	long	japonica
BE18_191	Grobbendonk	2018-09-18	2018	Fall	long	japonica
BE18_192	Grobbendonk	2018-09-18	2018	Fall	long	japonica
BE18_194	Grobbendonk	2018-09-18	2018	Fall	long	japonica
BE18_195	Grobbendonk	2018-09-18	2018	Fall	long	japonica
BE18_196	Grobbendonk	2018-09-18	2018	Fall	long	japonica
BE18_197	Grobbendonk	2018-09-18	2018	Fall	long	japonica
BE18_198	Grobbendonk	2018-09-18	2018	Fall	long	japonica
BE18_199	Grobbendonk	2018-09-18	2018	Fall	long	japonica
BE18_200	Grobbendonk	2018-09-18	2018	Fall	long	japonica
BE18_202	Grobbendonk	2018-09-18	2018	Fall	long	japonica
BE18_203	Grobbendonk	2018-09-18	2018	Fall	long	japonica
BE18_204	Grobbendonk	2018-09-18	2018	Fall	long	japonica
BE18_205	Grobbendonk	2018-09-18	2018	Fall	long	japonica
BE18_206	Grobbendonk	2018-09-18	2018	Fall	long	japonica
BE18_190	Grobbendonk	2018-09-18	2018	Fall	short	sinensis
BE18_193	Grobbendonk	2018-09-18	2018	Fall	short	sinensis
BE18_201	Grobbendonk	2018-09-18	2018	Fall	short	sinensis
BE19_36	Grobbendonk	2019-05-23	2019	Spring	Sequence	japonica	E. japonica H1
BE19_38	Grobbendonk	2019-05-23	2019	Spring	Sequence	japonica	E. japonica H1
BE19_B23	Grobbendonk	2019-04-01	2019	Spring	Sequence	japonica	E. japonica H1
BE19_B25	Grobbendonk	2019-04-01	2019	Spring	Sequence	japonica	E. japonica H1
BE19_B28	Grobbendonk	2019-04-01	2019	Spring	Sequence	japonica	E. japonica H1
BE19_B29	Grobbendonk	2019-04-01	2019	Spring	Sequence	japonica	E. japonica H1
BE19_208	Grobbendonk	2019-04-01	2019	Spring	long	japonica
BE19_211	Grobbendonk	2019-04-01	2019	Spring	long	japonica
BE19_214	Grobbendonk	2019-04-01	2019	Spring	long	japonica
BE19_215	Grobbendonk	2019-04-01	2019	Spring	long	japonica
BE19_217	Grobbendonk	2019-04-01	2019	Spring	long	japonica
BE19_218	Grobbendonk	2019-04-01	2019	Spring	long	japonica
BE19_220	Grobbendonk	2019-04-01	2019	Spring	long	japonica
BE19_221	Grobbendonk	2019-04-01	2019	Spring	long	japonica
BE19_222	Grobbendonk	2019-04-01	2019	Spring	long	japonica
BE19_223	Grobbendonk	2019-05-23	2019	Spring	long	japonica
BE19_224	Grobbendonk	2019-05-23	2019	Spring	long	japonica
BE19_225	Grobbendonk	2019-05-23	2019	Spring	long	japonica
BE19_B21	Grobbendonk	2019-04-01	2019	Spring	Sequence	sinensis	H1
BE19_B22	Grobbendonk	2019-04-01	2019	Spring	Sequence	sinensis	H1
BE19_B24	Grobbendonk	2019-04-01	2019	Spring	Sequence	sinensis	H1
BE19_B26	Grobbendonk	2019-04-01	2019	Spring	Sequence	sinensis	H1
BE19_B27	Grobbendonk	2019-04-01	2019	Spring	Sequence	sinensis	H1
BE19_B30	Grobbendonk	2019-04-01	2019	Spring	Sequence	sinensis	H1
BE19_209	Grobbendonk	2019-04-01	2019	Spring	short	sinensis
BE19_210	Grobbendonk	2019-04-01	2019	Spring	short	sinensis
BE19_212	Grobbendonk	2019-04-01	2019	Spring	short	sinensis
BE19_213	Grobbendonk	2019-04-01	2019	Spring	short	sinensis
BE19_216	Grobbendonk	2019-04-01	2019	Spring	short	sinensis
BE19_219	Grobbendonk	2019-04-01	2019	Spring	short	sinensis
BE19_226	Grobbendonk	2019-05-23	2019	Spring	short	sinensis
BE19_227	Grobbendonk	2019-05-23	2019	Spring	short	sinensis
BE19_230	Grobbendonk	2019-05-23	2019	Spring	short	sinensis
BE19_231	Grobbendonk	2019-05-23	2019	Spring	short	sinensis
BE19_233	Grobbendonk	2019-05-23	2019	Spring	short	sinensis
BE19_234	Grobbendonk	2019-05-23	2019	Spring	short	sinensis
BE19_235	Grobbendonk	2019-05-23	2019	Spring	short	sinensis
BE19_236	Grobbendonk	2019-05-23	2019	Spring	short	sinensis
BE19_238	Grobbendonk	2019-10-01	2019	Fall	long	japonica
BE19_240	Grobbendonk	2019-10-01	2019	Fall	long	japonica
BE19_241	Grobbendonk	2019-10-01	2019	Fall	long	japonica
BE19_245	Grobbendonk	2019-10-01	2019	Fall	long	japonica
BE19_246	Grobbendonk	2019-10-01	2019	Fall	long	japonica
BE19_248	Grobbendonk	2019-11-13	2019	Fall	long	japonica
BE19_249	Grobbendonk	2019-11-13	2019	Fall	long	japonica
BE19_251	Grobbendonk	2019-11-13	2019	Fall	long	japonica
BE19_255	Grobbendonk	2019-11-13	2019	Fall	long	japonica
BE19_256	Grobbendonk	2019-11-13	2019	Fall	long	japonica
BE19_239	Grobbendonk	2019-10-01	2019	Fall	short	sinensis
BE19_242	Grobbendonk	2019-10-01	2019	Fall	short	sinensis
BE19_247	Grobbendonk	2019-10-01	2019	Fall	short	sinensis
BE19_252	Grobbendonk	2019-11-13	2019	Fall	short	sinensis
BE19_254	Grobbendonk	2019-11-13	2019	Fall	short	sinensis
BE20_41	Grobbendonk	2020-04-21	2020	Spring	Sequence	japonica	E. japonica H1
BE20_45	Grobbendonk	2020-04-21	2020	Spring	Sequence	japonica	E. japonica H1
BE20_47	Grobbendonk	2020-04-21	2020	Spring	Sequence	japonica	E. japonica H1
BE20_48	Grobbendonk	2020-04-21	2020	Spring	Sequence	japonica	E. japonica H1
BE20_51	Grobbendonk	2020-05-08	2020	Spring	Sequence	japonica	E. japonica H1
BE20_53	Grobbendonk	2020-05-08	2020	Spring	Sequence	japonica	E. japonica H1
BE20_54	Grobbendonk	2020-05-08	2020	Spring	Sequence	japonica	E. japonica H1
BE20_56	Grobbendonk	2020-05-08	2020	Spring	Sequence	japonica	E. japonica H1
BE20_57	Grobbendonk	2020-05-08	2020	Spring	Sequence	japonica	E. japonica H1
BE20_59	Grobbendonk	2020-05-08	2020	Spring	Sequence	japonica	E. japonica H1
BE20_67	Kalken	2020-05-17	2020	Spring	Sequence	japonica	E. japonica H1
BE20_72	Kalken	2020-05-17	2020	Spring	Sequence	japonica	E. japonica H1
BE20_260	Grobbendonk	2020-05-18	2020	Spring	long	japonica
BE20_261	Grobbendonk	2020-05-18	2020	Spring	long	japonica
BE20_267	Grobbendonk	2020-05-18	2020	Spring	long	japonica
BE20_269	Grobbendonk	2020-05-18	2020	Spring	long	japonica
BE20_270	Grobbendonk	2020-05-18	2020	Spring	long	japonica
BE20_271	Grobbendonk	2020-05-18	2020	Spring	long	japonica
BE20_272	Grobbendonk	2020-05-18	2020	Spring	long	japonica
BE20_273	Grobbendonk	2020-05-25	2020	Spring	long	japonica
BE20_274	Grobbendonk	2020-05-25	2020	Spring	long	japonica
BE20_277	Grobbendonk	2020-05-25	2020	Spring	long	japonica
BE20_278	Grobbendonk	2020-05-25	2020	Spring	long	japonica
BE20_279	Grobbendonk	2020-05-25	2020	Spring	long	japonica
BE20_280	Grobbendonk	2020-05-25	2020	Spring	long	japonica
BE20_283	Grobbendonk	2020-05-25	2020	Spring	long	japonica
BE20_284	Grobbendonk	2020-05-25	2020	Spring	long	japonica
BE20_285	Grobbendonk	2020-05-25	2020	Spring	long	japonica
BE20_44	Grobbendonk	2020-04-21	2020	Spring	long	japonica
BE20_46	Grobbendonk	2020-04-21	2020	Spring	long	japonica
BE20_52	Grobbendonk	2020-05-08	2020	Spring	long	japonica
BE20_55	Grobbendonk	2020-05-08	2020	Spring	long	japonica
BE20_58	Grobbendonk	2020-05-08	2020	Spring	long	japonica
BE20_49	Grobbendonk	2020-04-21	2020	Spring	Sequence	sinensis	H1
BE20_50	Grobbendonk	2020-04-21	2020	Spring	Sequence	sinensis	H1
BE20_60	Grobbendonk	2020-05-08	2020	Spring	Sequence	sinensis	H1
BE20_43	Grobbendonk	2020-04-21	2020	Spring	Sequence	sinensis	H3
BE20_263	Grobbendonk	2020-05-18	2020	Spring	short	sinensis
BE20_264	Grobbendonk	2020-05-18	2020	Spring	short	sinensis
BE20_265	Grobbendonk	2020-05-18	2020	Spring	short	sinensis
BE20_266	Grobbendonk	2020-05-18	2020	Spring	short	sinensis
BE20_268	Grobbendonk	2020-05-18	2020	Spring	short	sinensis
BE20_275	Grobbendonk	2020-05-25	2020	Spring	short	sinensis
BE20_276	Grobbendonk	2020-05-25	2020	Spring	short	sinensis
BE20_282	Grobbendonk	2020-05-25	2020	Spring	short	sinensis
BE20_286	Grobbendonk	2020-05-25	2020	Spring	short	sinensis
BE20_287	Grobbendonk	2020-05-25	2020	Spring	short	sinensis
BE20_156	Grobbendonk	2020-10-22	2020	Fall	long	japonica
BE20_115	Steendorp	2020-09-15	2020	Fall	Sequence	japonica	E. japonica H1
BE20_119	Steendorp	2020-09-15	2020	Fall	Sequence	japonica	E. japonica H1
BE20_133	Bergenmeersen	2020-10-20	2020	Fall	Sequence	japonica	E. japonica H1
BE20_137	Doel	2020-09-02	2020	Fall	Sequence	japonica	E. japonica H1
BE20_143	Doel	2020-09-02	2020	Fall	Sequence	japonica	E. japonica H1
BE20_145	Doel	2020-09-02	2020	Fall	Sequence	japonica	E. japonica H1
BE20_148	Grobbendonk	2020-10-22	2020	Fall	Sequence	japonica	E. japonica H1
BE20_149	Grobbendonk	2020-10-22	2020	Fall	Sequence	japonica	E. japonica H1
BE20_150	Grobbendonk	2020-10-22	2020	Fall	Sequence	japonica	E. japonica H1
BE20_151	Grobbendonk	2020-10-22	2020	Fall	Sequence	japonica	E. japonica H1
BE20_152	Grobbendonk	2020-10-22	2020	Fall	Sequence	japonica	E. japonica H1
BE20_154	Grobbendonk	2020-10-22	2020	Fall	Sequence	japonica	E. japonica H1
BE20_155	Grobbendonk	2020-10-22	2020	Fall	Sequence	japonica	E. japonica H1
BE20_139	Doel	2020-09-02	2020	Fall	Sequence	sinensis	H1
BE20_142	Doel	2020-09-02	2020	Fall	Sequence	sinensis	H1
BE20_144	Doel	2020-09-02	2020	Fall	Sequence	sinensis	H1
BE20_147	Grobbendonk	2020-10-22	2020	Fall	Sequence	sinensis	H1
BE20_113	Steendorp	2020-09-15	2020	Fall	Sequence	sinensis	H18
BE20_126	Steendorp	2020-09-15	2020	Fall	Sequence	sinensis	H3
BE21_288	Grobbendonk	2021-04-05	2021	Spring	long	japonica
BE21_289	Grobbendonk	2021-04-05	2021	Spring	long	japonica
BE21_290	Grobbendonk	2021-04-05	2021	Spring	long	japonica
BE21_291	Grobbendonk	2021-04-05	2021	Spring	long	japonica
BE21_292	Grobbendonk	2021-04-05	2021	Spring	long	japonica
BE21_293	Grobbendonk	2021-04-05	2021	Spring	long	japonica
BE21_294	Grobbendonk	2021-04-05	2021	Spring	long	japonica
BE21_295	Grobbendonk	2021-04-05	2021	Spring	long	japonica
BE21_296	Grobbendonk	2021-04-05	2021	Spring	long	japonica
BE21_297	Grobbendonk	2021-04-05	2021	Spring	long	japonica
BE21_299	Grobbendonk	2021-04-05	2021	Spring	long	japonica
BE21_300	Grobbendonk	2021-04-05	2021	Spring	long	japonica
BE21_301	Grobbendonk	2021-04-05	2021	Spring	long	japonica
BE21_302	Grobbendonk	2021-04-05	2021	Spring	long	japonica
BE21_303	Grobbendonk	2021-04-05	2021	Spring	long	japonica
BE21_304	Grobbendonk	2021-04-05	2021	Spring	long	japonica
BE21_305	Grobbendonk	2021-04-05	2021	Spring	long	japonica
BE21_306	Grobbendonk	2021-04-05	2021	Spring	long	japonica
BE21_308	Grobbendonk	2021-04-05	2021	Spring	long	japonica
BE21_309	Grobbendonk	2021-04-05	2021	Spring	long	japonica
BE21_310	Grobbendonk	2021-04-05	2021	Spring	long	japonica
BE21_311	Grobbendonk	2021-04-05	2021	Spring	long	japonica
BE21_312	Grobbendonk	2021-04-05	2021	Spring	long	japonica
BE21_313	Grobbendonk	2021-04-19	2021	Spring	long	japonica
BE21_315	Grobbendonk	2021-04-19	2021	Spring	long	japonica
BE21_316	Grobbendonk	2021-04-19	2021	Spring	long	japonica
BE21_319	Grobbendonk	2021-04-19	2021	Spring	long	japonica
BE21_320	Grobbendonk	2021-04-19	2021	Spring	long	japonica
BE21_322	Grobbendonk	2021-04-19	2021	Spring	long	japonica
BE21_324	Grobbendonk	2021-04-19	2021	Spring	long	japonica
BE21_325	Grobbendonk	2021-04-19	2021	Spring	long	japonica
BE21_326	Grobbendonk	2021-04-19	2021	Spring	long	japonica
BE21_330	Grobbendonk	2021-04-19	2021	Spring	long	japonica
BE21_333	Grobbendonk	2021-04-19	2021	Spring	long	japonica
BE21_335	Grobbendonk	2021-04-19	2021	Spring	long	japonica
BE21_298	Grobbendonk	2021-04-05	2021	Spring	short	sinensis
BE21_314	Grobbendonk	2021-04-19	2021	Spring	short	sinensis
BE21_317	Grobbendonk	2021-04-19	2021	Spring	short	sinensis
BE21_318	Grobbendonk	2021-04-19	2021	Spring	short	sinensis
BE21_321	Grobbendonk	2021-04-19	2021	Spring	short	sinensis
BE21_327	Grobbendonk	2021-04-19	2021	Spring	short	sinensis
BE21_328	Grobbendonk	2021-04-19	2021	Spring	short	sinensis
BE21_329	Grobbendonk	2021-04-19	2021	Spring	short	sinensis
BE21_331	Grobbendonk	2021-04-19	2021	Spring	short	sinensis
BE21_332	Grobbendonk	2021-04-19	2021	Spring	short	sinensis
BE21_334	Grobbendonk	2021-04-19	2021	Spring	short	sinensis
BE21_336	Grobbendonk	2021-04-19	2021	Spring	short	sinensis
BE21_337	Grobbendonk	2021-04-19	2021	Spring	short	sinensis
BE21_339	Grobbendonk	2021-10-01	2021	Fall	long	japonica
BE21_341	Grobbendonk	2021-10-01	2021	Fall	long	japonica
BE21_347	Grobbendonk	2021-10-01	2021	Fall	long	japonica
BE21_349	Grobbendonk	2021-11-18	2021	Fall	long	japonica
BE21_352	Grobbendonk	2021-11-18	2021	Fall	long	japonica
BE21_353	Grobbendonk	2021-11-18	2021	Fall	long	japonica
BE21_354	Grobbendonk	2021-11-18	2021	Fall	long	japonica
BE21_355	Grobbendonk	2021-11-18	2021	Fall	long	japonica
BE21_357	Grobbendonk	2021-11-18	2021	Fall	long	japonica
BE21_338	Grobbendonk	2021-10-01	2021	Fall	short	sinensis
BE21_342	Grobbendonk	2021-10-01	2021	Fall	short	sinensis
BE21_343	Grobbendonk	2021-10-01	2021	Fall	short	sinensis
BE21_344	Grobbendonk	2021-10-01	2021	Fall	short	sinensis
BE21_348	Grobbendonk	2021-10-01	2021	Fall	short	sinensis
BE21_350	Grobbendonk	2021-11-18	2021	Fall	short	sinensis
BE22_360	Grobbendonk	2022-03-31	2022	Spring	long	japonica
BE22_361	Grobbendonk	2022-03-31	2022	Spring	long	japonica
BE22_363	Grobbendonk	2022-03-31	2022	Spring	long	japonica
BE22_364	Grobbendonk	2022-03-31	2022	Spring	long	japonica
BE22_365	Grobbendonk	2022-03-31	2022	Spring	long	japonica
BE22_366	Grobbendonk	2022-03-31	2022	Spring	long	japonica
BE22_367	Grobbendonk	2022-03-31	2022	Spring	long	japonica
BE22_370	Grobbendonk	2022-03-31	2022	Spring	long	japonica
BE22_372	Grobbendonk	2022-03-31	2022	Spring	long	japonica
BE22_374	Grobbendonk	2022-03-31	2022	Spring	long	japonica
BE22_375	Grobbendonk	2022-03-31	2022	Spring	long	japonica
BE22_376	Grobbendonk	2022-03-31	2022	Spring	long	japonica
BE22_377	Grobbendonk	2022-03-31	2022	Spring	long	japonica
BE22_378	Grobbendonk	2022-03-31	2022	Spring	long	japonica
BE22_379	Grobbendonk	2022-03-31	2022	Spring	long	japonica
BE22_380	Grobbendonk	2022-03-31	2022	Spring	long	japonica
BE22_383	Grobbendonk	2022-04-24	2022	Spring	long	japonica
BE22_384	Grobbendonk	2022-04-24	2022	Spring	long	japonica
BE22_386	Grobbendonk	2022-04-24	2022	Spring	long	japonica
BE22_388	Grobbendonk	2022-04-24	2022	Spring	long	japonica
BE22_390	Grobbendonk	2022-04-24	2022	Spring	long	japonica
BE22_391	Grobbendonk	2022-04-24	2022	Spring	long	japonica
BE22_394	Grobbendonk	2022-04-24	2022	Spring	long	japonica
BE22_396	Grobbendonk	2022-04-24	2022	Spring	long	japonica
BE22_399	Grobbendonk	2022-04-24	2022	Spring	long	japonica
BE22_403	Grobbendonk	2022-04-24	2022	Spring	long	japonica
BE22_405	Grobbendonk	2022-04-24	2022	Spring	long	japonica
BE22_358	Grobbendonk	2022-03-31	2022	Spring	short	sinensis
BE22_359	Grobbendonk	2022-03-31	2022	Spring	short	sinensis
BE22_362	Grobbendonk	2022-03-31	2022	Spring	short	sinensis
BE22_368	Grobbendonk	2022-03-31	2022	Spring	short	sinensis
BE22_369	Grobbendonk	2022-03-31	2022	Spring	short	sinensis
BE22_373	Grobbendonk	2022-03-31	2022	Spring	short	sinensis
BE22_382	Grobbendonk	2022-03-31	2022	Spring	short	sinensis
BE22_387	Grobbendonk	2022-04-24	2022	Spring	short	sinensis
BE22_389	Grobbendonk	2022-04-24	2022	Spring	short	sinensis
BE22_392	Grobbendonk	2022-04-24	2022	Spring	short	sinensis
BE22_397	Grobbendonk	2022-04-24	2022	Spring	short	sinensis
BE22_398	Grobbendonk	2022-04-24	2022	Spring	short	sinensis
BE22_400	Grobbendonk	2022-04-24	2022	Spring	short	sinensis
BE22_401	Grobbendonk	2022-04-24	2022	Spring	short	sinensis
BE22_404	Grobbendonk	2022-04-24	2022	Spring	short	sinensis
BE22_407	Grobbendonk	2022-04-24	2022	Spring	short	sinensis
BE22_408	Grobbendonk	2022-09-28	2022	Fall	long	japonica
BE22_418	Grobbendonk	2022-11-10	2022	Fall	long	japonica
BE22_416	Grobbendonk	2022-09-28	2022	Fall	short	sinensis
BE23_429	Grobbendonk	2023-04-26	2023	Spring	long	japonica
BE23_431	Grobbendonk	2023-04-26	2023	Spring	long	japonica
BE23_432	Grobbendonk	2023-04-26	2023	Spring	long	japonica
BE23_434	Grobbendonk	2023-04-26	2023	Spring	long	japonica
BE23_436	Grobbendonk	2023-04-26	2023	Spring	long	japonica
BE23_437	Grobbendonk	2023-04-26	2023	Spring	long	japonica
BE23_438	Grobbendonk	2023-04-26	2023	Spring	long	japonica
BE23_439	Grobbendonk	2023-04-26	2023	Spring	long	japonica
BE23_442	Grobbendonk	2023-04-26	2023	Spring	long	japonica
BE23_443	Grobbendonk	2023-04-26	2023	Spring	long	japonica
BE23_445	Grobbendonk	2023-04-26	2023	Spring	long	japonica
BE23_446	Grobbendonk	2023-04-26	2023	Spring	long	japonica
BE23_448	Grobbendonk	2023-04-26	2023	Spring	long	japonica
BE23_454	Grobbendonk	2023-06-29	2023	Spring	long	japonica
BE23_457	Grobbendonk	2023-06-29	2023	Spring	long	japonica
BE23_458	Grobbendonk	2023-06-29	2023	Spring	long	japonica
BE23_459	Grobbendonk	2023-06-29	2023	Spring	long	japonica
BE23_460	Grobbendonk	2023-06-29	2023	Spring	long	japonica
BE23_461	Grobbendonk	2023-06-29	2023	Spring	long	japonica
BE23_462	Grobbendonk	2023-06-29	2023	Spring	long	japonica
BE23_464	Grobbendonk	2023-06-29	2023	Spring	long	japonica
BE23_465	Grobbendonk	2023-06-29	2023	Spring	long	japonica
BE23_468	Grobbendonk	2023-06-29	2023	Spring	long	japonica
BE23_471	Grobbendonk	2023-06-29	2023	Spring	long	japonica
BE23_475	Grobbendonk	2023-06-29	2023	Spring	long	japonica
BE23_476	Grobbendonk	2023-06-29	2023	Spring	long	japonica
BE23_428	Grobbendonk	2023-04-26	2023	Spring	short	sinensis
BE23_433	Grobbendonk	2023-04-26	2023	Spring	short	sinensis
BE23_441	Grobbendonk	2023-04-26	2023	Spring	short	sinensis
BE23_444	Grobbendonk	2023-04-26	2023	Spring	short	sinensis
BE23_447	Grobbendonk	2023-04-26	2023	Spring	short	sinensis
BE23_449	Grobbendonk	2023-04-26	2023	Spring	short	sinensis
BE23_450	Grobbendonk	2023-04-26	2023	Spring	short	sinensis
BE23_451	Grobbendonk	2023-04-26	2023	Spring	short	sinensis
BE23_453	Grobbendonk	2023-06-29	2023	Spring	short	sinensis
BE23_455	Grobbendonk	2023-06-29	2023	Spring	short	sinensis
BE23_463	Grobbendonk	2023-06-29	2023	Spring	short	sinensis
BE23_466	Grobbendonk	2023-06-29	2023	Spring	short	sinensis
BE23_469	Grobbendonk	2023-06-29	2023	Spring	short	sinensis
BE23_470	Grobbendonk	2023-06-29	2023	Spring	short	sinensis
BE23_472	Grobbendonk	2023-06-29	2023	Spring	short	sinensis
BE23_473	Grobbendonk	2023-06-29	2023	Spring	short	sinensis
BE23_474	Grobbendonk	2023-06-29	2023	Spring	short	sinensis
BE23_B02	Grobbendonk	2023-10-10	2023	Fall	long	japonica
BE23_B03	Grobbendonk	2023-10-10	2023	Fall	long	japonica
BE23_B04	Grobbendonk	2023-10-10	2023	Fall	long	japonica
BE23_B07	Grobbendonk	2023-10-10	2023	Fall	long	japonica
BE23_B11	Grobbendonk	2023-10-10	2023	Fall	long	japonica
BE23_B14	Grobbendonk	2023-10-10	2023	Fall	long	japonica
BE23_B18	Grobbendonk	2023-10-10	2023	Fall	long	japonica
BE23_B19	Grobbendonk	2023-10-10	2023	Fall	long	japonica
BE23_B27	Grobbendonk	2023-10-10	2023	Fall	long	japonica
BE23_B28	Grobbendonk	2023-10-10	2023	Fall	long	japonica
BE23_B31	Grobbendonk	2023-10-10	2023	Fall	long	japonica
BE23_B32	Grobbendonk	2023-10-10	2023	Fall	long	japonica
BE23_B34	Grobbendonk	2023-10-10	2023	Fall	long	japonica
BE23_B35	Grobbendonk	2023-10-10	2023	Fall	long	japonica
BE23_B40	Grobbendonk	2023-10-10	2023	Fall	long	japonica
BE23_B41	Grobbendonk	2023-10-10	2023	Fall	long	japonica
BE23_B43	Grobbendonk	2023-10-10	2023	Fall	long	japonica
BE23_B44	Grobbendonk	2023-10-10	2023	Fall	long	japonica
BE23_B47	Grobbendonk	2023-10-10	2023	Fall	long	japonica
BE23_B53	Grobbendonk	2023-10-10	2023	Fall	long	japonica
BE23_B59	Grobbendonk	2023-10-10	2023	Fall	long	japonica
BE23_B63	Grobbendonk	2023-10-10	2023	Fall	long	japonica
BE23_B66	Grobbendonk	2023-10-10	2023	Fall	long	japonica
BE23_B67	Grobbendonk	2023-10-10	2023	Fall	long	japonica
BE23_B69	Grobbendonk	2023-10-10	2023	Fall	long	japonica
BE23_B74	Grobbendonk	2023-10-10	2023	Fall	long	japonica
BE23_B76	Grobbendonk	2023-10-10	2023	Fall	long	japonica
BE23_B82	Grobbendonk	2023-10-10	2023	Fall	long	japonica
BE23_B83	Grobbendonk	2023-10-10	2023	Fall	long	japonica
BE23_B86	Grobbendonk	2023-10-10	2023	Fall	long	japonica
BE23_B91	Grobbendonk	2023-10-10	2023	Fall	long	japonica
BE23_B92	Grobbendonk	2023-10-10	2023	Fall	long	japonica
BE23_B94	Grobbendonk	2023-10-10	2023	Fall	long	japonica
BE23_B96	Grobbendonk	2023-10-10	2023	Fall	long	japonica
BE23_B99	Grobbendonk	2023-10-10	2023	Fall	long	japonica
BE23_B01	Grobbendonk	2023-10-10	2023	Fall	short	sinensis
BE23_B15	Grobbendonk	2023-10-10	2023	Fall	short	sinensis
BE23_B22	Grobbendonk	2023-10-10	2023	Fall	short	sinensis
BE23_B25	Grobbendonk	2023-10-10	2023	Fall	short	sinensis
BE23_B37	Grobbendonk	2023-10-10	2023	Fall	short	sinensis
BE23_B38	Grobbendonk	2023-10-10	2023	Fall	short	sinensis
BE23_B48	Grobbendonk	2023-10-10	2023	Fall	short	sinensis
BE23_B50	Grobbendonk	2023-10-10	2023	Fall	short	sinensis
BE23_B55	Grobbendonk	2023-10-10	2023	Fall	short	sinensis
BE23_B61	Grobbendonk	2023-10-10	2023	Fall	short	sinensis
BE23_B65	Grobbendonk	2023-10-10	2023	Fall	short	sinensis
BE23_B71	Grobbendonk	2023-10-10	2023	Fall	short	sinensis
BE23_B79	Grobbendonk	2023-10-10	2023	Fall	short	sinensis
BE23_B80	Grobbendonk	2023-10-10	2023	Fall	short	sinensis
BE23_B98	Grobbendonk	2023-10-10	2023	Fall	short	sinensis
