# Supplementary material
Source: Research Square preprint supplement (doi:10.21203/rs.3.rs-9149727/v1)
Supplement: Supplementary file 4 [file ef514c104d434e1bc5d1c503.xlsx]

## Sheet: readme
ID	Identification number individual crab
Country	Country where crab was captured
Mitospecies	Species based on mitochondrial DNA (COI)
Sex	Sex based on shape pleon
Carapace width	Carapace width of crab measured dorsally just behind the fourth pair of lateral spines
Mass	Mass in kg
NrTurns	Number of turns a crab could complete before exhaustion
GlucRest	Haemolymph glucose concentration (mg/L) at rest
GlucPostEx	Haemolymph glucose concentration (mg/L) post-exercise
LactRest	Haemolymph lactate concentration (mg/L) at rest
LactPostEx	Haemolymph lactose concentration (mg/L) post-exercise
RoutMetRate	Routine metabolic rate (mg O2/kg/h)
MaxMetRate	Maximum metabolic rate (mg O2/kg/h)
AerobicScope	Aerobic scope (mg O2/kg/h)
Lipids	Lipid content of hepatopancreatic tissue (g/g wet weight, %)
MissingLimb	Note on whether the crab was missing a pereiopod (yes; maximum one was missing/no; no pereiopod missing)
Comment

## Sheet: dataset
ID	Country	Mitospecies	Sex	CarapaceWidth	Mass	NrTurns	GlucRest	GlucPostEx	LactRest	LactPostEx	RoutMetRate	MaxMetRate	AerobicScope	Lipids	MissingLimb	Comment
B01	Belgium	sinensis	female	57.63	0.085	61	356.447	358.66	185.837	446.725	264.466	1086.07	821.6	28.2145	no	NA
B02	Belgium	japonica	male	55.01	0.079	16	305.668	579.786	109.847	277.615	516.849	1461.16	944.312	29.584	no	NA
B03	Belgium	japonica	male	48.03	0.052	29	146.829	157.793	26.3084	77.8489	309.31	2240.85	1931.54	13.7076	yes	NA
B04	Belgium	japonica	male	50.45	0.06	44	NA	288.483	86.646	219.668	219.987	1955.56	1735.58	27.2627	no	NA
G05	Germany	sinensis	male	70.96	0.191	11	117.426	231.949	37.1059	65.6412	92.4558	295.006	202.55	0.660384	no	NA
G06	Germany	sinensis	female	56.43	0.07	18	65.0491	313.215	53.7145	235.788	280.264	1458.82	1178.56	1.05627	no	mild disease
B07	Belgium	japonica	male	56.62	0.09	25	254.112	260.52	95.6692	264.422	291.907	646.529	354.622	42.8435	no	NA
G08	Germany	sinensis	male	66.67	0.145	28	172.674	596.666	42.5322	131.082	NA	NA	NA	45.0114	no	NA
G09	Germany	sinensis	female	51.6	0.052	52	223.029	268.127	40.2634	146.786	382.945	1276.85	893.901	25.7839	no	NA
G10	Germany	sinensis	male	59.3	0.106	27	176.432	230.756	22.4906	283.628	106.4	903.806	797.406	47.701	no	NA
B11	Belgium	japonica	male	64.55	0.126	6	199.16	574.92	32.9722	81.5093	293.593	663.961	370.367	31.6297	yes	NA
G12	Germany	sinensis	female	54.92	0.079	68	102.283	241.962	29.9049	335.696	236.727	618.503	381.776	4.44436	no	NA
G13	Germany	sinensis	male	55.93	0.088	45	153.417	234.022	47.5257	131.66	NA	NA	NA	35.4184	no	NA
B14	Belgium	japonica	female	52.14	0.057	8	144.731	450.399	22.5513	39.619	128.792	525.191	396.399	49.2506	no	NA
B15	Belgium	sinensis	male	52.29	0.058	28	202.683	480.832	72.7269	357.026	268.425	649.759	381.333	43.8116	no	NA
G16	Germany	sinensis	male	57.4	0.1	27	167.154	338.153	145.065	417.223	205.471	1732.93	1527.46	31.6554	no	missing 1 left eye
G17	Germany	sinensis	male	60.26	0.128	36	178.204	359.918	51.6234	93.5665	178.274	448.836	270.563	35.4654	no	little barnacle
B18	Belgium	japonica	male	72.93	0.177	12	103.622	289.167	6.66175	253.141	122.008	544.757	422.75	24.0603	yes	missing eye
B19	Belgium	japonica	male	58.22	0.091	32	127.386	237.793	56.764	275.402	104.67	1073.55	968.885	23.0646	no	NA
G20	Germany	sinensis	male	58.61	0.114	38	197.843	378.168	36.5087	242.317	182.169	804.661	622.491	29.4785	no	NA
G21	Germany	sinensis	male	69.92	0.178	28	188.21	295.297	98.3179	256.772	107.869	580.048	472.18	41.8962	no	escaped and placed back (20-10-2023)
B22	Belgium	sinensis	female	61.18	0.104	51	104.075	404.805	44.4404	153.829	180.129	884.841	704.712	16.1533	no	NA
G23	Germany	sinensis	male	61.28	0.116	41	264.865	584.862	57.0844	211.713	191.886	1586.61	1394.73	38.7904	yes	one gill is out (20-10-2023)
G24	Germany	sinensis	female	60.04	0.095	33	173.443	363.348	81.2163	135.3	103.314	1635.51	1532.2	38.3445	no	NA
B25	Belgium	sinensis	female	58.86	0.093	43	163.164	435.569	44.6733	156.023	144.311	890.705	746.394	46.3256	no	NA
G26	Germany	sinensis	female	53.1	0.071	54	233.176	344.569	68.9637	266.253	386.49	1953.41	1566.92	47.5327	no	NA
B27	Belgium	japonica	male	52.7	0.069	26	326.206	508.505	26.2477	235.126	237.035	1456.98	1219.95	12.3043	no	NA
B28	Belgium	japonica	female	54.28	0.061	20	216.12	187.669	58.8208	267.014	275.069	1935.64	1660.57	17.4143	no	NA
G29	Germany	sinensis	female	56.95	0.094	45	219.579	423.209	121.884	320.823	NA	NA	NA	44.8573	no	toe missing
G30	Germany	sinensis	male	56.14	0.093	51	288.354	472.276	143.552	186.558	174.439	523.737	349.299	33.274	no	NA
B31	Belgium	japonica	female	57.24	0.084	19	104.682	192.113	47.1716	483.702	163.849	333.665	169.816	8.90022	no	escaped and placed back (20-10-2023)
B32	Belgium	japonica	male	74.14	0.147	24	159.432	382.576	30.3454	399.975	305.787	790.657	484.871	35.7318	no	NA
G33	Germany	sinensis	male	75.12	0.215	50	141.013	405.435	19.579	679.924	161.014	703.824	542.81	38.1969	no	NA
B34	Belgium	japonica	male	59.06	0.097	34	102.609	207.075	52.4065	197.064	124.614	929.211	804.597	20.1332	yes	NA
B35	Belgium	japonica	female	54.24	0.067	51	187.424	299.266	39.0974	225.308	615.831	1169.68	553.845	24.5049	no	NA
G36	Germany	sinensis	female	56.25	0.086	53	185.593	442.405	83.059	285.15	111.513	875.018	763.506	42.8821	no	NA
B37	Belgium	sinensis	male	54.37	0.069	35	164.391	330.162	34.3267	264.659	396.442	983.793	587.351	12.5697	no	NA
B38	Belgium	sinensis	male	55.26	0.081	24	126.546	440.172	21.2889	73.6186	325.066	767.602	442.536	22.2592	yes	NA
G39	Germany	sinensis	female	51.43	0.067	51	284.964	558.655	121.079	435.539	429.844	1105.25	675.409	47.5717	no	NA
B40	Belgium	japonica	female	67.11	0.111	67	123.644	366.13	35.2319	390.63	NA	NA	NA	15.9322	no	NA
B41	Belgium	japonica	female	64.39	0.114	48	136.44	646.904	50.0772	378.934	87.3479	575.118	487.77	43.8972	no	half toe missing
G42	Germany	sinensis	male	56.9	0.102	20	172.767	127.328	72.9571	341.709	203.924	568.661	364.737	31.4531	no	NA
B43	Belgium	japonica	male	60.1	0.097	34	148.813	395.887	27.0078	138.117	205.285	1591.69	1386.4	29.6394	yes	NA
B44	Belgium	japonica	male	46.45	0.046	48	260.683	181.226	66.024	361.086	301.028	531.31	230.283	35.5893	yes	NA
G45	Germany	sinensis	male	77.77	0.191	43	134.255	NA	111.747	753.497	189.887	594.934	405.047	12.8597	no	NA
G46	Germany	sinensis	female	53.96	0.07	31	171.827	303.125	62.4329	87.1755	504.193	1276.63	772.436	5.48369	no	NA
B48	Belgium	sinensis	female	52.3	0.056	49	117.513	302.325	75.5686	83.5269	589.879	1399.43	809.555	17.2804	no	new put in on 21-10-2023, scar on carapace
G49	Germany	sinensis	male	57.56	0.089	54	172.815	354.997	55.4207	136.499	258.037	869.57	611.533	30.5511	no	NA
B50	Belgium	sinensis	female	57.44	0.079	61	347.309	330.252	63.5571	350.625	171.919	741.213	569.295	39.9235	yes	NA
G51	Germany	sinensis	female	57.99	0.093	61	187.635	264.22	77.7943	387.479	350.095	1016.23	666.138	35.1796	no	NA
G52	Germany	sinensis	male	52.78	0.074	55	168.521	476.832	171.422	452.901	483.405	1104.16	620.757	37.5009	no	NA
B53	Belgium	japonica	male	49.75	0.05	71	204.233	314.451	102.946	503.089	428.206	1600.88	1172.68	21.3848	no	NA
G54	Germany	sinensis	female	58.27	0.094	28	175.483	330.008	146.165	187.904	71.7661	843.55	771.784	37.9732	no	1 barnacle
B55	Belgium	sinensis	female	52.86	0.065	43	56.7076	91.039	6.2122	276.46	NA	NA	NA	NA	no	new put in on 21-10-2023
G56	Germany	sinensis	male	62.21	0.131	31	170.054	296.078	83.1859	150.912	323.619	743.384	419.765	47.715	no	NA
G57	Germany	sinensis	male	63.6	0.138	39	165.735	263.42	249.847	600.571	179.674	389.181	209.507	18.9785	no	NA
G58	Germany	sinensis	female	56.71	0.086	37	153.939	276.859	94.4545	260.619	416.498	924.929	508.43	11.7554	no	NA
B59	Belgium	japonica	female	48.07	0.043	24	199.051	238.808	39.1413	110.308	252.355	1553.77	1301.42	28.6336	no	NA
G60	Germany	sinensis	male	59.9	0.108	32	140.631	307.035	120.264	347.72	133.402	817.069	683.667	50.602	no	NA
B61	Belgium	sinensis	male	64.95	0.125	21	118.172	203.243	32.8984	129.07	130.968	369.752	238.784	2.81173	yes	NA
G62	Germany	sinensis	male	57.97	0.102	33	207.346	209.753	72.0559	96.257	218.147	957.779	739.632	22.6255	no	two barnacles, missing one spine
B63	Belgium	japonica	female	64.54	0.087	26	193.529	353.26	43.9353	162.563	239.163	605.353	366.19	18.8559	yes	NA
G64	Germany	sinensis	female	63.28	0.118	29	184.83	633.209	159.998	463.692	78.3174	363.419	285.102	39.1649	no	NA
B65	Belgium	sinensis	male	61.27	0.116	27	165.766	389.149	36.8708	285.192	151.573	1440.44	1288.87	29.345	no	NA
B66	Belgium	japonica	female	55.17	0.069	49	197.423	244.464	79.5384	282.487	235.922	1678.2	1442.28	25.3055	no	NA
B67	Belgium	japonica	female	65.29	0.131	51	181.159	336.573	33.5586	271.089	167.581	855.704	688.122	41.3543	no	NA
G68	Germany	sinensis	female	58.33	0.092	20	227.812	366.086	54.3402	169.856	220.3	1539.26	1318.96	38.5466	yes	NA
B69	Belgium	japonica	female	61.06	0.097	65	176.315	250.409	59.2808	229.86	118.654	520.036	401.381	41.9283	no	NA
G70	Germany	sinensis	male	58.2	0.105	50	171.716	328.284	50.1677	98.1921	480.269	801.86	321.591	50.276	no	NA
B71	Belgium	sinensis	female	58.72	0.094	26	214.188	436.983	35.7501	307.343	193.388	677.377	483.989	19.0223	no	NA
G72	Germany	sinensis	male	76.56	0.237	21	161.996	439.051	52.184	281.199	101.713	636.396	534.684	9.55507	no	NA
G73	Germany	sinensis	female	56.64	0.077	34	217.055	201.304	34.7896	83.2223	NA	NA	NA	37.5447	yes	NA
B74	Belgium	japonica	female	53.21	0.055	118	174.987	252.702	119.033	286.561	82.6105	685.2	602.589	36.5067	yes	tiny leg and small toe
G75	Germany	sinensis	female	54.96	0.072	37	291.637	244.967	59.0539	222.422	286.22	1237.28	951.056	33.1581	yes	NA
B76	Belgium	japonica	male	58.43	0.092	26	190.764	277.403	51.6966	209.788	175.648	1745.34	1569.7	43.5645	no	NA
G77	Germany	sinensis	male	57.86	0.092	30	200.49	339.751	58.2838	189.693	232.129	1771.54	1539.41	31.8311	no	NA
G78	Germany	sinensis	female	52.11	0.074	50	215.671	327.248	64.6804	196.245	NA	NA	NA	35.2015	no	NA
B79	Belgium	sinensis	female	61.94	0.1	47	145.739	370.382	79.0623	212.691	159.08	504.434	345.355	20.429	no	NA
B80	Belgium	sinensis	female	59.39	0.088	42	170.864	258.766	30.0521	126.135	266.223	1307.59	1041.36	20.9115	yes	NA
G81	Germany	sinensis	male	57.34	0.101	38	101.207	158.311	22.3333	134.922	288.92	686.569	397.649	NA	no	NA
B82	Belgium	japonica	male	59.1	0.097	21	151.304	243.888	23.6873	188.41	241.257	481.066	239.81	27.8515	yes	NA
B83	Belgium	japonica	female	51.54	0.059	47	273.404	293.133	76.8008	140.353	251.485	1157.8	906.311	40.4155	no	NA
G84	Germany	sinensis	male	55.36	0.086	33	182.499	234.628	96.6666	115.848	146.476	789.322	642.847	35.4875	yes	NA
G85	Germany	sinensis	female	56.58	0.083	30	203.329	266.6	78.4571	197.188	66.4273	797.444	731.017	43.2155	no	NA
B86	Belgium	japonica	male	53.17	0.073	44	217.534	337.643	118.673	177.618	632.245	1533.97	901.726	45.2933	no	NA
G87	Germany	sinensis	male	58.13	0.103	57	208.498	386.312	80.9192	459.134	198.309	893.432	695.123	51.94	no	NA
G88	Germany	sinensis	male	63.57	0.15	36	161.823	304.045	176.28	235.339	74.9282	516.952	442.024	43.7086	no	pink pleodus
G89	Germany	sinensis	female	55.05	0.075	42	163.488	281.882	70.5632	88.9202	804.08	2084.72	1280.64	39.0744	yes	NA
G90	Germany	sinensis	male	55.26	0.085	49	142.84	339.978	48.8431	236.986	234.402	1984.56	1750.16	31.5648	yes	NA
B91	Belgium	japonica	female	55.23	0.077	29	151.665	315.255	113.004	165.105	107.946	587.011	479.065	NA	no	NA
B92	Belgium	japonica	male	53.26	0.076	23	226.763	448.028	255.024	326.213	777.434	1043.34	265.905	38.1555	yes	NA
G93	Germany	sinensis	female	55.58	0.074	29	42.6509	105.805	13.8697	197.611	348.908	1543.86	1194.96	NA	no	mild disease
B94	Belgium	japonica	female	51.82	0.059	43	165.242	344.247	61.8046	320.186	100.612	1060.47	959.862	28.9561	no	NA
G95	Germany	sinensis	male	58.01	0.103	65	131.313	439.52	112.555	851.321	224.38	856.733	632.353	43.0431	no	mild disease
B96	Belgium	japonica	female	53.61	0.069	64	145.751	402.81	65.4125	387.358	241.043	1461.57	1220.52	12.4172	no	NA
G97	Germany	sinensis	female	52.15	0.074	38	208.881	320.809	87.8363	193.162	175.901	509.27	333.369	43.1984	no	mild disease
B98	Belgium	sinensis	male	55.61	0.082	49	185.199	244.927	160.868	410.669	NA	NA	NA	12.768	yes	NA
B99	Belgium	japonica	female	55.77	0.073	81	198.765	198.663	96.8324	658.698	476.918	1119.29	642.37	38.6343	yes	NA
G100	Germany	sinensis	male	57.82	0.097	74	98.399	319.398	100.314	424.917	NA	NA	NA	32.3514	no	strange eye
